# Supplementary material for: Using DNA metabarcoding to assess insect diversity in citrus orchards
Source: PeerJ. 2023 May 5;11:e15338. doi: 10.7717/peerj.15338 (PMC10166080; doi:10.7717/peerj.15338)
Supplement: Supplemental Information 1 [file peerj-11-15338-s001.xlsx]

## Sheet: Sheet1
Table S1 Malaise trap samples and their PCR and Sequencing replicates
Malaise trap samples			PCR replicates			Sequencing replicates
Location	Sample (bottle#)	Collection period (yy/mm/dd)	PCR R.1	PCR R.2	PCR R.3	SEQ R.1.1	SEQ R.1.2	SEQ R.2.1	SEQ R.2.2	SEQ R.3.1	SEQ R.3.2
Orchard GAN	S03	2018/5/11－2018/6/14	S3-1	S3-2	Failed	s3.1_1	s3.1_2	s3.2_1	s3.2_2	Failed	Failed
Orchard GAN	S09	2018/9/11-2018/10/11	S9-1	S9-2	S9-3	s9.1_1	s9.1_2	s9.2_1	s9.2_2	s9.3_1	s9.3_2
Orchard GAN	S11	2018/10/11－2018/11/15	S11-1	S11-2	S11-3	s11.1_1	s11.1_2	s11.2_1	s11.2_2	s11.3_1	s11.3_2
Orchard GAN	S16	2018/11/15－2018/12/14	S16-1	S16-2	S16-3	s16.1_1	s16.1_2	s16.2_1	s16.2_2	s16.3_1	s16.3_2
Orchard GAN	S18	2018/12/14－2019/1/18	S18-1	S18-2	S18-3	s18.1_1	s18.1_2	s18.2_1	s18.2_2	s18.3_1	s18.3_2
Orchard GAN	S19	2018/12/14－2019/1/18	S19-1	S19-2	S19-3	s19.1_1	s19.1_2	s19.2_1	s19.2_2	s19.3_1	s19.3_2
Orchard GAN	S39	2018/4/13－2018/5/11	S39-1	S39-2	S39-3	s39.1_1	s39.1_2	s39.2_1	s39.2_2	s39.3_1	s39.3_2
Orchard GAN	S41	2018/6/14－2018/7/13	S41-1	S41-2	S41-3	s41.1_1	s41.1_2	s41.2_1	s41.2_2	s41.3_1	s41.3_2
Orchard GAN	S23	2019/3/19－2019/4/15	S23-1	S23-2	S23-3	s23.1_1	s23.1_2	s23.2_1	s23.2_2	s23.3_1	s23.3_2
Orchard GAN	S24	2019/2/19-2019/3/19	S24-1	S24-2	S24-3	s24.1_1	s24.1_2	s24.2_1	s24.2_2	s24.3_1	s24.3_2
Orchard GAN	S30	2019/4/15－2019/5/15	S30-1	S30-2	S30-3	s30.1_1	s30.1_2	s30.2_1	s30.2_2	s30.3_1	s30.3_2
Orchard GAN	S37	2019/6/14－2019/7/12	S37-1	S37-2	S37-3	s37.1_1	s37.1_2	s37.2_1	s37.2_2	s37.3_1	s37.3_2
Orchard QIU	S01	2018/4/13－2018/5/11	S1-1	S1-2	S1-3	s1.1_1	s1.1_2	s1.2_1	s1.2_2	s1.3_1	s1.3_2
Orchard QIU	S06	2018/4/13－2018/5/11	S6-1	S6-2	S6-3	s6.1_1	s6.1_2	s6.2_1	s6.2_2	s6.3_1	s6.3_2
Orchard QIU	S07	2018/6/14－2018/7/13	S7-1	S7-2	S7-3	s7.1_1	s7.1_2	s7.2_1	s7.2_2	s7.3_1	s7.3_2
Orchard QIU	S08	2018/9/11-2018/10/11	S8-1	S8-2	S8-3	s8.1_1	s8.1_2	s8.2_1	s8.2_2	s8.3_1	s8.3_2
Orchard QIU	S12	2018/10/11－2018/11/15	S12-1	S12-2	S12-3	s12.1_1	s12.1_2	s12.2_1	s12.2_2	s12.3_1	s12.3_2
Orchard QIU	S14	2018/11/15－2018/12/14	S14-1	S14-2	S14-3	s14.1_1	s14.1_2	s14.2_1	s14.2_2	s14.3_1	s14.3_2
Orchard QIU	S20	2018/12/14－2019/1/18	S20-1	S20-2	S20-3	s20.1_1	s20.1_2	s20.2_1	s20.2_2	s20.3_1	s20.3_2
Orchard QIU	S21	2019/1/18－2019/2/19	S21-1	S21-2	S21-3	s21.1_1	s21.1_2	s21.2_1	s21.2_2	s21.3_1	s21.3_2
Orchard QIU	S40	2018/5/11－2018/6/14	S40-1	S40-2	S40-3	s40.1_1	s40.1_2	s40.2_1	s40.2_2	s40.3_1	s40.3_2
Orchard QIU	S25	2019/3/19－2019/4/15	S25-1	S25-2	S25-3	s25.1_1	s25.1_2	s25.2_1	s25.2_2	s25.3_1	s25.3_2
Orchard QIU	S26	2019/2/19-2019/3/19	S26-1	S26-2	S26-3	s26.1_1	s26.1_2	s26.2_1	s26.2_2	s26.3_1	s26.3_2
Orchard QIU	S29	2019/4/15－2019/5/15	S29-1	S29-2	S29-3	s29.1_1	s29.1_2	s29.2_1	s29.2_2	s29.3_1	s29.3_2
Orchard QIU	S32	2019/5/15－2019/6/14	S32-1	S32-2	S32-3	s32.1_1	s32.1_2	s32.2_1	s32.2_2	s32.3_1	s32.3_2
Orchard QIU	S33	2019/5/15－2019/6/14	S33-1	S33-2	S33-3	s33.1_1	s33.1_2	s33.2_1	s33.2_2	s33.3_1	s33.3_2
Orchard QIU	S35	2019/6/14－2019/7/12	S35-1	S35-2	S35-3	s35.1_1	s35.1_2	s35.2_1	s35.2_2	s35.3_1	s35.3_2
Orchard SHI	S02	2018/4/13－2018/5/11	S2-1	S2-2	S2-3	s2.1_1	s2.1_2	s2.2_1	s2.2_2	s2.3_1	s2.3_2
Orchard SHI	S04	2018/5/11－2018/6/14	S4-1	S4-2	S4-3	s4.1_1	s4.1_2	s4.2_1	s4.2_2	s4.3_1	s4.3_2
Orchard SHI	S05	2018/6/14－2018/7/13	S5-1	S5-2	S5-3	s5.1_1	s5.1_2	s5.2_1	s5.2_2	s5.3_1	s5.3_2
Orchard SHI	S10	2018/9/11-2018/10/11	Failed	S10-2	S10-3	Failed	Failed	s10.2_1	s10.2_2	s10.3_1	s10.3_2
Orchard SHI	S13	2018/10/11－2018/11/15	S13-1	S13-2	S13-3	s13.1_1	s13.1_2	s13.2_1	s13.2_2	s13.3_1	s13.3_2
Orchard SHI	S15	2018/11/15－2018/12/14	S15-1	S15-2	S15-3	s15.1_1	s15.1_2	s15.2_1	s15.2_2	s15.3_1	s15.3_2
Orchard SHI	S17	2018/12/14－2019/1/18	S17-1	S17-2	S17-3	s17.1_1	s17.1_2	s17.2_1	s17.2_2	s17.3_1	s17.3_2
Orchard SHI	S22	2018/5/11－2018/6/14	S22-1	S22-2	S22-3	s22.1_1	s22.1_2	s22.2_1	s22.2_2	s22.3_1	s22.3_2
Orchard SHI	S27	2019/3/19－2019/4/15	S27-1	S27-2	S27-3	s27.1_1	s27.1_2	s27.2_1	s27.2_2	s27.3_1	s27.3_2
Orchard SHI	S28	2019/2/19-2019/3/19	S28-1	S28-2	S28-3	s28.1_1	s28.1_2	s28.2_1	s28.2_2	s28.3_1	s28.3_2
Orchard SHI	S31	2019/4/15－2019/5/15	S31-1	S31-2	S31-3	s31.1_1	s31.1_2	s31.2_1	s31.2_2	s31.3_1	s31.3_2
Orchard SHI	S34	2019/5/15－2019/6/14	S34-1	S34-2	S34-3	s34.1_1	s34.1_2	s34.2_1	s34.2_2	s34.3_1	s34.3_2
Orchard SHI	S36	2019/6/14－2019/7/12	Failed	S36-2	S36-3	Failed	Failed	s36.2_1	s36.2_2	s36.3_1	s36.3_2
Orchard SHI	S38	2019/1/18-2019/2/19	S38-1	S38-2	S38-3	s38.1_1	s38.1_2	s38.2_1	s38.2_2	s38.3_1	s38.3_2
Orchard GAN	S42	2018/7/13－2018/8/10	S42-1	S42-2	S42-3	s42.1_1	s42.1_2	s42.2_1	s42.2_2	s42.3_1	s42.3_2
Orchard GAN	S43	2018/8/10－2018/9/8	S43-1	S43-2	S43-3	s43.1_1	s43.1_2	s43.2_1	s43.2_2	s43.3_1	s43.3_2
Note: GAN and SHI had 14 samples and QIU had 15 samples as two sample bottles were missing in the site Orchard GAN and SHI during the collection.
