# Supplementary material for: Using DNA metabarcoding to assess insect diversity in citrus orchards
Source: PeerJ. 2023 May 5;11:e15338. doi: 10.7717/peerj.15338 (PMC10166080; doi:10.7717/peerj.15338)
Supplement: Supplemental Information 2 [file peerj-11-15338-s002.xlsx]

## Sheet: Sheet1
Class	order	family	subfamily	genus	species	bin_uri	Status
Insecta	Blattodea	Ectobiidae	Blattellinae	Blattella	Blattella lituricollis, Blattella bisignata	BOLD:ACD8236	Pest
Insecta	Blattodea	Blattidae	Blattinae	Hebardina	Hebardina concinna	BOLD:ACQ7601	Pest
Insecta	Blattodea	Termitidae	Macrotermitinae	Odontotermes	Odontotermes formosanus	BOLD:ACS4673	Pest
Insecta	Blattodea					BOLD:ADT8029
Insecta	Coleoptera	Endomychidae	Lycoperdininae	Ancylopus	Ancylopus asiaticus	BOLD:ACV6599	Pest
Insecta	Coleoptera	Cerambycidae	Lamiinae	Anoplophora	Anoplophora chinensis	BOLD:ACF1042	Pest
Insecta	Coleoptera	Cerambycidae	Lamiinae	Anoplophora	Anoplophora chinensis	BOLD:ADV3409	Pest
Insecta	Coleoptera	Cerambycidae	Lamiinae	Anoplophora	Anoplophora horsfieldi, Anoplophora freyi	BOLD:AAJ2718	Pest
Insecta	Coleoptera	Anthribidae	Choraginae	Araecerus	Araecerus fasciculatus	BOLD:AAH0210	Pest
Insecta	Coleoptera	Chrysomelidae	Galerucinae	Argopistes		BOLD:ADV5970
Insecta	Coleoptera	Chrysomelidae	Galerucinae	Argopistes	Argopistes tsekooni	BOLD:AEA5262	Pest
Insecta	Coleoptera	Staphylinidae	Paederinae	Astenus	Astenus indicus	BOLD:ACG6387	Pest
Insecta	Coleoptera	Chrysomelidae	Galerucinae	Aulacophora	Aulacophora lewisii	BOLD:AAP7992	Pest
Insecta	Coleoptera	Coccinellidae	Coccinellinae	Calvia	Calvia muiri	BOLD:ADS7811	Predator
Insecta	Coleoptera	Nitidulidae	Carpophilinae	Carpophilus	Carpophilus marginellus, Carpophilus sp. SCU	BOLD:ACB6149	Pest
Insecta	Coleoptera	Nitidulidae	Carpophilinae	Carpophilus	Carpophilus nepos	BOLD:ABX0653	Pest
Insecta	Coleoptera	Coccinellidae	Coccinellinae	Cheilomenes	Cheilomenes sexmaculata	BOLD:AEA4822	Predator
Insecta	Coleoptera	Coccinellidae	Coccinellinae	Menochilus, Cheilomenes	Cheilomenes sexmaculata, Menochilus sexmaculatus	BOLD:ACM3340	Predator
Insecta	Coleoptera	Coccinellidae	Coccinellinae	Chilocorus	Chilocorus politus	BOLD:ADU2631	Predator
Insecta	Coleoptera	Coccinellidae	Coccinellinae	Chilocorus	Chilocorus renipustulatus, Chilocorus bipustulatus	BOLD:AAO1521	Predator
Insecta	Coleoptera	Cerambycidae	Cerambycinae	Chlorophorus	Chlorophorus annularis	BOLD:ADR4072	Pest
Insecta	Coleoptera	Curculionidae	Scolytinae	Cnestus	Cnestus mutilatus	BOLD:ACB5610	Pest
Insecta	Coleoptera	Coccinellidae	Coccinellinae	Coelophora	Coelophora saucia	BOLD:ACD4976	Predator
Insecta	Coleoptera	Chrysomelidae	Eumolpinae	Colasposoma	Colasposoma auripenne	BOLD:ADH6210	Pest
Insecta	Coleoptera	Chrysomelidae	Eumolpinae	Colasposoma	Colasposoma dauricum	BOLD:ACH8791	Pest
Insecta	Coleoptera	Latridiidae	Corticariinae	Corticarina	Corticarina truncatella	BOLD:ACO4981	Pest
Insecta	Coleoptera	Latridiidae	Corticariinae	Cortinicara	Cortinicara gibbosa, Cortinicara sp. O40	BOLD:AAI8935	Pest
Insecta	Coleoptera	Laemophloeidae		Cryptolestes	Cryptolestes ferrugineus	BOLD:ACM6835	Pest
Insecta	Coleoptera	Laemophloeidae		Cryptolestes	Cryptolestes pusillus, Cryptolestes sp. SCU	BOLD:ACQ2301	Predator
Insecta	Coleoptera	Erotylidae	Cryptophilinae, Languriinae	Cryptophilus	Cryptophilus integer	BOLD:ABX1692	Pest
Insecta	Coleoptera	Erotylidae	Cryptophilinae	Cryptophilus	Cryptophilus obliteratus	BOLD:AAP6170	Pest
Insecta	Coleoptera	Tenebrionidae	Diaperinae	Cynaeus	Cynaeus angustus	BOLD:ADM3801	Pest
Insecta	Coleoptera	Chrysomelidae	Galerucinae	Diabrotica	Diabrotica semiopaca	BOLD:ACM1805	Pest
Insecta	Coleoptera	Nitidulidae	Epuraeinae	Epuraea	Epuraea luteolus	BOLD:ABY3382	Pest
Insecta	Coleoptera	Nitidulidae	Epuraeinae	Epuraea	Epuraea ocularis	BOLD:ABX6025	Pest
Insecta	Coleoptera	Nitidulidae	Epuraeinae	Epuraea	Epuraea ocularis	BOLD:ADG3621	Pest
Insecta	Coleoptera	Chrysomelidae	Galerucinae	Galerucella	Galerucella grisescens	BOLD:ABX7703	Pest
Insecta	Coleoptera	Coccinellidae	Coccinellinae	Henosepilachna	Henosepilachna vigintioctopunctata	BOLD:AAI6802	Pest
Insecta	Coleoptera	Curculionidae	Hyperinae	Hypera	Hypera basalis	BOLD:ACS4876	Pest
Insecta	Coleoptera	Chrysomelidae	Galerucinae	Luperomorpha	Luperomorpha xanthodera	BOLD:ACC1219	Pest
Insecta	Coleoptera	Chrysomelidae	Galerucinae	Luperomorpha	Luperomorpha xanthodera	BOLD:ADJ6073	Pest
Insecta	Coleoptera	Coccinellidae	Coccinellinae	Micraspis	Micraspis discolor	BOLD:ACD6402	Pest
Insecta	Coleoptera	Mordellidae	Mordellinae	Mordellistena	Mordellistena stoeckleini	BOLD:ACG8844	Pest
Insecta	Coleoptera	Chrysomelidae	Cassidinae	Oocassida, Cassida	Oocassida pudibunda, Cassida circumdata	BOLD:ABX7335	Pest
Insecta	Coleoptera	Staphylinidae	Paederinae	Paederus	Paederus fuscipes	BOLD:ADY5142	Parasitoid
Insecta	Coleoptera	Staphylinidae	Paederinae	Paederus	Paederus fuscipes, Paederus caligatus	BOLD:AAX1892	Parasitoid
Insecta	Coleoptera	Chrysomelidae	Eumolpinae	Pagria		BOLD:ACW8270
Insecta	Coleoptera	Chrysomelidae	Galerucinae	Parathrylea	Parathrylea septempunctata	BOLD:ADK6481	Pest
Insecta	Coleoptera	Staphylinidae	Staphylininae	Philonthus	Philonthus sp. AMGS 80876, Philonthus sp. 1 JAPM-2012, Philonthus longicornis	BOLD:ACD1225	Pest
Insecta	Coleoptera	Chrysomelidae	Galerucinae	Phyllotreta	Phyllotreta striolata, Phyllotreta flexuosa	BOLD:ABX2406	Pest
Insecta	Coleoptera	Chrysomelidae	Cryptocephalinae	Physosmaragdina	Physosmaragdina nigrifrons	BOLD:ADU4028	Pest
Insecta	Coleoptera	Coccinellidae	Coccinellinae	Platynaspis	Platynaspis maculosa	BOLD:ACD7606	Pest
Insecta	Coleoptera	Anthribidae	Anthribinae	Platystomos	Platystomos albinus	BOLD:AAP7159	Pest
Insecta	Coleoptera	Coccinellidae	Coccinellinae	Propylea	Propylea quatuordecimpunctata, Propylea punctata14	BOLD:AAF6935	Pest
Insecta	Coleoptera	Bostrichidae	Dinoderinae	Rhyzopertha	Rhyzopertha dominica	BOLD:ACB4329	Pest
Insecta	Coleoptera	Cerambycidae	Lamiinae	Ropica	Ropica cf. subnotata	BOLD:ACV8739	Pest
Insecta	Coleoptera	Coccinellidae	Coccinellinae	Scymnus	Scymnus fuscatus	BOLD:ACV1539	Pest
Insecta	Coleoptera	Coccinellidae	Coccinellinae	Scymnus	Scymnus kaguyahime	BOLD:ADY5051	Pest
Insecta	Coleoptera	Coccinellidae	Microweiseinae	Serangium	Serangium japonicum	BOLD:ADY3178	Predator
Insecta	Coleoptera	Nitidulidae	Carpophilinae	Urophorus, Carpophilus	Urophorus humeralis, Carpophilus hemipterus, Carpophilus humeralis	BOLD:ABX4044	Pest
Insecta	Coleoptera	Anthribidae				BOLD:ACU9938
Insecta	Coleoptera	Anthribidae				BOLD:ADA7976
Insecta	Coleoptera	Buprestidae	Agrilinae	Agrilus		BOLD:AAY5905
Insecta	Coleoptera	Carabidae	Harpalinae	Harpalus		BOLD:ACB3770
Insecta	Coleoptera	Carabidae				BOLD:AAP7908
Insecta	Coleoptera	Carabidae				BOLD:ADC2041
Insecta	Coleoptera	Carabidae				BOLD:ADD3782
Insecta	Coleoptera	Carabidae				BOLD:ADV4397
Insecta	Coleoptera	Chrysomelidae				BOLD:ABX2105
Insecta	Coleoptera	Chrysomelidae				BOLD:ACD4540
Insecta	Coleoptera	Chrysomelidae				BOLD:ACV4983
Insecta	Coleoptera	Chrysomelidae				BOLD:ACZ4781
Insecta	Coleoptera	Chrysomelidae				BOLD:ADD5835
Insecta	Coleoptera	Cleridae				BOLD:ADI8544
Insecta	Coleoptera	Cleridae				BOLD:ADJ4684
Insecta	Coleoptera	Coccinellidae	Coccinellinae	Stethorus		BOLD:ACV1721
Insecta	Coleoptera	Coccinellidae	Coccinellinae			BOLD:AEB6470
Insecta	Coleoptera	Coccinellidae	Coccinellinae			BOLD:AEB6471
Insecta	Coleoptera	Coccinellidae				BOLD:ACV1820
Insecta	Coleoptera	Coccinellidae				BOLD:ADC2125
Insecta	Coleoptera	Coccinellidae				BOLD:ADG8223
Insecta	Coleoptera	Coccinellidae				BOLD:ADI5270
Insecta	Coleoptera	Coccinellidae				BOLD:ADJ2366
Insecta	Coleoptera	Coccinellidae				BOLD:ADS7844
Insecta	Coleoptera	Corylophidae				BOLD:ABX3265
Insecta	Coleoptera	Corylophidae				BOLD:ADH3589
Insecta	Coleoptera	Corylophidae				BOLD:ADV9073
Insecta	Coleoptera	Curculionidae				BOLD:ADT1725
Insecta	Coleoptera	Discolomatidae	Aphanocephalinae	Aphanocephalus		BOLD:ADP6501
Insecta	Coleoptera	Endomychidae				BOLD:ACI8826
Insecta	Coleoptera	Mordellidae	Mordellinae			BOLD:ACN7824
Insecta	Coleoptera	Mordellidae				BOLD:ACV5605
Insecta	Coleoptera	Mordellidae				BOLD:ADB8663
Insecta	Coleoptera	Mycetophagidae				BOLD:ACV6104
Insecta	Coleoptera	Mycetophagidae				BOLD:ACY2785
Insecta	Coleoptera	Nitidulidae	Epuraeinae	Epuraea		BOLD:ADG6768
Insecta	Coleoptera	Ptinidae				BOLD:ADI7799
Insecta	Coleoptera	Ptinidae				BOLD:ADJ2474
Insecta	Coleoptera	Scarabaeidae				BOLD:ACD5833
Insecta	Coleoptera	Silvanidae				BOLD:ACN3636
Insecta	Coleoptera	Staphylinidae	Aleocharinae	Aleochara		BOLD:AAN6489
Insecta	Coleoptera	Staphylinidae	Aleocharinae	Drusilla		BOLD:ACL9556
Insecta	Coleoptera	Staphylinidae	Staphylininae			BOLD:AAU7313
Insecta	Coleoptera	Staphylinidae	Staphylininae			BOLD:ADM8987
Insecta	Coleoptera	Staphylinidae				BOLD:ACD6685
Insecta	Coleoptera	Staphylinidae				BOLD:ACN5870
Insecta	Coleoptera	Staphylinidae				BOLD:ACN6720
Insecta	Coleoptera	Staphylinidae				BOLD:ACO0585
Insecta	Coleoptera	Staphylinidae				BOLD:ACR2449
Insecta	Coleoptera	Staphylinidae				BOLD:ACV5000
Insecta	Coleoptera	Staphylinidae				BOLD:ACW2429
Insecta	Coleoptera	Staphylinidae				BOLD:ACZ2278
Insecta	Coleoptera	Staphylinidae				BOLD:ADF9317
Insecta	Coleoptera	Staphylinidae				BOLD:ADH1998
Insecta	Coleoptera	Staphylinidae				BOLD:ADL5102
Insecta	Coleoptera	Staphylinidae				BOLD:ADT1996
Insecta	Coleoptera	Staphylinidae				BOLD:ADU4796
Insecta	Coleoptera	Staphylinidae				BOLD:ADV5555
Insecta	Coleoptera	Tenebrionidae				BOLD:ADT5254
Insecta	Coleoptera					BOLD:ADS0745
Insecta	Coleoptera					BOLD:ADS1905
Insecta	Dermaptera	Anisolabididae		Anisolabella	Anisolabella marginalis	BOLD:AEB3771	Predator
Insecta	Dermaptera	Anisolabididae	Anisolabidinae	Euborellia		BOLD:ADI1352
Insecta	Diptera	Agromyzidae	Agromyzinae	Agromyza	Agromyza albipennis	BOLD:AAG4745	Pest
Insecta	Diptera	Mycetophilidae	Leiinae	Allactoneura		BOLD:ACH1792
Insecta	Diptera	Culicidae	Anophelinae	Anopheles	Anopheles belenrae, Anopheles kweiyangensis, Anopheles anthropophagus, Anopheles sinensis, Anopheles engarensis, Anopheles vagus, Anopheles lesteri, Anopheles kleini	BOLD:AAA5339	Pest
Insecta	Diptera	Anthomyiidae	Anthomyiinae	Anthomyia	Anthomyia illocata	BOLD:ACD8455	Pest
Insecta	Diptera	Tachinidae	Exoristinae	Aplomya	Aplomya metallica	BOLD:ACH8065	Parasitoid
Insecta	Diptera	Tachinidae	Exoristinae	Aplomya	Aplomya metallica	BOLD:ADZ1169	Parasitoid
Insecta	Diptera	Syrphidae	Syrphinae	Asarkina	Asarkina ericetorum	BOLD:ABY7698	Predator
Insecta	Diptera	Muscidae	Atherigoninae	Atherigona	Atherigona orientalis	BOLD:AAG6816	Pest
Insecta	Diptera	Chloropidae, Muscidae	Atherigoninae, Oscinellinae	Atherigona, Anatrichus	Atherigona orientalis, Anatrichus sp. 11538	BOLD:AAF5305	Pest
Insecta	Diptera	Muscidae	Atherigoninae	Atherigona	Atherigona oryzae	BOLD:AAM7320	Pest
Insecta	Diptera	Muscidae	Atherigoninae	Atherigona	Atherigona reversura	BOLD:AAN8579	Pest
Insecta	Diptera	Tephritidae	Dacinae	Zeugodacus, Bactrocera	Bactrocera latifrons, Zeugodacus tau	BOLD:AAB9956	Pest
Insecta	Diptera	Tephritidae	Dacinae	Bactrocera	Bactrocera Sp.25, Bactrocera musae, Bactrocera bryoniae, Bactrocera propinqua, Bactrocera Sp.40, Bactrocera philippinensis, Bactrocera opiliae, Bactrocera Sp.27, Bactrocera lombokensis, Bactrocera Sp.24, Bactrocera Sp.4, Bactrocera pallida, Bactrocera thailandica, Bactrocera sp., Bactrocera endiandrae, Bactrocera Sp.53, Bactrocera Sp.9, Bactrocera carambolae, Bactrocera makilingensis, Bactrocera …	BOLD:AAA2295	Pest
Insecta	Diptera	Tephritidae	Dacinae	Zeugodacus, Bactrocera	Bactrocera tau, Zeugodacus zahadi, Bactrocera sp., Zeugodacus tau, Bactrocera cucurbitae, Bactrocera sp. 2, Bactrocera sp. 4, Bactrocera calumniata, Bactrocera zahadi, Bactrocera Sp.11	BOLD:AAA5440	Pest
Insecta	Diptera	Calliphoridae	Bengaliinae	Bengalia	Bengalia latro	BOLD:ADK6665	Pest
Insecta	Diptera	Calliphoridae	Bengaliinae	Bengalia	Bengalia latro	BOLD:ADW6895	Pest
Insecta	Diptera	Syrphidae	Syrphinae	Betasyrphus	Betasyrphus serarius	BOLD:AAZ5448	Predator
Insecta	Diptera	Sphaeroceridae	Limosininae	Spelobia, Bifronsina	Bifronsina bifrons, Spelobia luteilabris, Spelobia bifrons	BOLD:AAN6408	Pest
Insecta	Diptera	Ephydridae	Ephydrinae	Brachydeutera		BOLD:ABX7186
Insecta	Diptera	Sciaridae		Bradysia	Bradysia gibbosa	BOLD:ACO5209	Pest
Insecta	Diptera	Sciaridae		Bradysia	Bradysia gibbosa	BOLD:AEC0074	Pest
Insecta	Diptera	Sciaridae		Bradysia	Bradysia nomica	BOLD:ABW7972	Pest
Insecta	Diptera	Sciaridae		Bradysia	Bradysia odoriphaga, Bradysia difformis, Bradysia impatiens	BOLD:AAV1295	Pest
Insecta	Diptera	Sciaridae		Bradysia	Bradysia peraffinis	BOLD:ACD7618	Pest
Insecta	Diptera	Sciaridae		Bradysia	Bradysia subaprica	BOLD:ACH9097	Pest
Insecta	Diptera	Psychodidae	Psychodinae	Brunettia		BOLD:ADT3105
Insecta	Diptera	Drosophilidae	Steganinae	Cacoxenus	Cacoxenus perspicax	BOLD:ACN4601	Pest
Insecta	Diptera	Drosophilidae	Steganinae	Cacoxenus		BOLD:ACQ2399
Insecta	Diptera	Chloropidae	Oscinellinae	Cadrema		BOLD:AAF5121
Insecta	Diptera	Chironomidae	Chironominae	Chironomus	Chironomus javanus	BOLD:AAG6924	Pest
Insecta	Diptera	Chironomidae	Chironominae	Chironomus	Chironomus ramosus, Chironomus flaviplumus, Chironomus sp. PK, Chironomus incertipenis	BOLD:AAW3997	Pest
Insecta	Diptera	Chironomidae	Chironominae	Chironomus	Chironomus samoensis, Chironomus circumdatus, Chironomus incertipenis	BOLD:AAG5483	Pest
Insecta	Diptera	Chironomidae	Chironominae	Chironomus	Chironomus samoensis, Chironomus flaviplumus	BOLD:ACO0599	Pest
Insecta	Diptera	Chironomidae	Chironominae	Chironomus		BOLD:ACQ9007
Insecta	Diptera	Chironomidae	Chironominae	Chironomus		BOLD:ACP6988
Insecta	Diptera	Chironomidae	Chironominae	Chironomus	Chironomus sp. BK831, Chironomus sp. BK821, Chironomus sp. 1sc, Chironomus sp. BMCK1, Chironomus sp. TR3, Chironomus sp. BMCK3, Chironomus sp. TR1, Chironomus sp. BMCK5, Chironomus sp. BMCK4, Chironomus samoensis, Chironomus sp. BYCK1, Chironomus flaviplumus, Chironomus sp. 2, Chironomus orientalis, Chironomus sp. BYCK2	BOLD:AAV5954	Pest
Insecta	Diptera	Chironomidae	Chironominae	Chironomus	Chironomus striatipennis, Chironomus kiiensis, Chironomus flaviplumus	BOLD:AAD8160	Pest
Insecta	Diptera	Calliphoridae	Chrysomyinae	Chrysomya	Chrysomya albiceps, Chrysomya rufifacies, Chrysomya rufifacies DI215, Chrysomya sp.	BOLD:AAB3064	Pest
Insecta	Diptera	Calliphoridae	Chrysomyinae	Chrysomya	Chrysomya phaonis, Chrysomya megacephala, Chrysomya pinguis	BOLD:ACF0516	Pest
Insecta	Diptera	Calliphoridae	Chrysomyinae	Chrysomya	Chrysomya putoria, Chrysomya defixa, Chrysomya rufifacies, Chrysomya cabrerai, Chrysomya megacephala DI212, Chrysomya greenbergi, Chrysomya bezziana, Chrysomya megacephala, Chrysomya saffranea, Chrysomya pacifica	BOLD:AAA5667	Pest
Insecta	Diptera	Calliphoridae	Calliphorinae, Chrysomyinae	Calliphora, Chrysomya, Aldrichina	Chrysomya rufifacies, Calliphora grahami, Calliphora chinghaiensis, Aldrichina grahami	BOLD:AAE1809	Pest
Insecta	Diptera	Dolichopodidae	Diaphorinae	Chrysotus	Chrysotus cilipes	BOLD:ACJ0835	Predator
Insecta	Diptera	Dolichopodidae	Diaphorinae	Chrysotus	Chrysotus cilipes, Chrysotus n. sp. choricus grp	BOLD:ACB5414	Predator
Insecta	Diptera	Dolichopodidae	Diaphorinae	Chrysotus	Chrysotus n. sp. choricus grp, Chrysotus pulchellus	BOLD:ACO1274	Pest
Insecta	Diptera	Dolichopodidae	Diaphorinae	Chrysotus	Chrysotus pulchellus	BOLD:ABX2177	Pest
Insecta	Diptera	Chironomidae	Chironominae	Cladopelma	Cladopelma edwardsi	BOLD:ADH0990	Pest
Insecta	Diptera	Chironomidae	Chironominae	Cladopelma	Cladopelma edwardsi	BOLD:ADH0991	Pest
Insecta	Diptera	Chironomidae	Chironominae	Cladotanytarsus	Cladotanytarsus paratridorsum, Cladotanytarsus vanderwulpi	BOLD:ADJ8209	Pest
Insecta	Diptera	Pipunculidae	Pipunculinae	Clistoabdominalis		BOLD:AAO3573
Insecta	Diptera	Scatopsidae	Scatopsinae	Coboldia	Coboldia fuscipes	BOLD:AAN8523	Pest
Insecta	Diptera	Muscidae	Coenosiinae	Coenosia	Coenosia acuticornis	BOLD:AAG6793	Predator
Insecta	Diptera	Muscidae	Coenosiinae	Coenosia	Coenosia attenuata	BOLD:AAD7633	Predator
Insecta	Diptera	Culicidae	Culicinae	Culex	Coquillettidia richiardii, Culex pipiens, Culex erythrothorax, Culex quinquefasciatus, Culiseta litorea, Aedes vexans, Culex australicus, Culex rotoruae, Culex sp. R73, Culex theileri, Culex torrentium, Culex trifilatus, Culex sp. S59, Culex globocoxitus, Aedes sp., Culex modestus, Aedes aegypti, Culex asteliae, Culex sp. Souala_1, Anopheles stephensi, Culex theobaldi, Culex pipiens s.l., Culex p…	BOLD:AAA4751	Pest
Insecta	Diptera	Chironomidae	Orthocladiinae	Corynoneura	Corynoneura lobata	BOLD:ADL2071	Pest
Insecta	Diptera	Chironomidae	Orthocladiinae	Corynoneura		BOLD:ADL1602
Insecta	Diptera	Chironomidae	Orthocladiinae	Cricotopus	Cricotopus bicinctus	BOLD:ABV9992	Pest
Insecta	Diptera	Chironomidae	Orthocladiinae	Cricotopus	Cricotopus bimaculatus	BOLD:ACB6235	Pest
Insecta	Diptera	Chironomidae	Orthocladiinae	Cricotopus	Cricotopus bimaculatus	BOLD:ADM7777	Pest
Insecta	Diptera	Chironomidae	Orthocladiinae	Cricotopus	Cricotopus bimaculatus	BOLD:ADS1448	Pest
Insecta	Diptera	Chironomidae	Orthocladiinae	Cricotopus	Cricotopus bimaculatus	BOLD:ADT2083	Pest
Insecta	Diptera	Chironomidae	Orthocladiinae	Cricotopus		BOLD:ADR0666
Insecta	Diptera	Chironomidae	Orthocladiinae	Cricotopus	Cricotopus sp. 8CSG, Cricotopus cf. bimaculatus	BOLD:ADM6709	Pest
Insecta	Diptera	Chironomidae	Orthocladiinae	Cricotopus	Cricotopus triannulatus	BOLD:ACO9062	Pest
Insecta	Diptera	Chironomidae	Orthocladiinae	Cricotopus	Cricotopus trifasciatus, Cricotopus sp., Cricotopus tricinctus, Cricotopus sylvestris, Cricotopus sp. 5ES	BOLD:AAV1709	Pest
Insecta	Diptera	Chironomidae	Chironominae	Cryptochironomus	Cryptochironomus defectus	BOLD:AEA8239	Pest
Insecta	Diptera	Culicidae	Culicinae	Culex	Culex annulioris, Culex bitaeniorhynchus, Culex infula, Culex ethiopicus	BOLD:AAJ7281	Pest
Insecta	Diptera	Culicidae	Culicinae	Culex	Culex mimulus	BOLD:ACF0834	Pest
Insecta	Diptera	Culicidae	Culicinae	Culex	Culex mimulus	BOLD:AEB3241	Pest
Insecta	Diptera	Culicidae	Culicinae	Armigeres, Culex	Culex quinquefasciatus, Armigeres subalbatus	BOLD:AAC8113	Pest
Insecta	Diptera	Culicidae	Culicinae	Culex	Culex quinquefasciatus, Culex vagans	BOLD:AAE7784	Pest
Insecta	Diptera	Culicidae	Culicinae	Culex	Culex tritaeniorhynchus	BOLD:ACB9497	Pest
Insecta	Diptera	Culicidae	Culicinae	Culex	Culex tritaeniorhynchus	BOLD:ADR2856	Pest
Insecta	Diptera	Culicidae	Culicinae	Culex, Aedes	Culex tritaeniorhynchus, Aedes albopictus, Culex tritaenorhyncus	BOLD:AAE3201	Pest
Insecta	Diptera	Culicidae	Culicinae	Culex	Culex vishnui, Culex pseudovishnui	BOLD:ACB9212	Pest
Insecta	Diptera	Culicidae	Culicinae	Culex	Culex vishnui, Culex tritaeniorhynchus	BOLD:AAI9879	Pest
Insecta	Diptera	Ceratopogonidae	Ceratopogoninae	Culicoides	Culicoides actoni, Culicoides minimus	BOLD:AAJ7360	Pest
Insecta	Diptera	Ceratopogonidae	Ceratopogoninae	Culicoides	Culicoides arakawae, Culicoides arakawai	BOLD:AAD6828	Pest
Insecta	Diptera	Ceratopogonidae	Ceratopogoninae	Culicoides	Culicoides brevitarsis, Culicoides asiana	BOLD:AAI9876	Pest
Insecta	Diptera	Ceratopogonidae	Ceratopogoninae	Culicoides	Culicoides morisitai	BOLD:ABA7593	Pest
Insecta	Diptera	Ceratopogonidae	Ceratopogoninae	Culicoides	Culicoides oxystoma	BOLD:AAD1856	Pest
Insecta	Diptera	Ceratopogonidae	Ceratopogoninae	Culicoides	Culicoides punctatus	BOLD:AAI9881	Pest
Insecta	Diptera	Ceratopogonidae	Ceratopogoninae	Culicoides	Culicoides punctatus	BOLD:AEA8799	Pest
Insecta	Diptera	Ceratopogonidae	Ceratopogoninae	Culicoides	Culicoides shortti	BOLD:ACT4386	Pest
Insecta	Diptera	Ceratopogonidae	Forcipomyiinae	Dasyhelea	Dasyhelea ludingensis	BOLD:AAO7733	Pest
Insecta	Diptera	Anthomyiidae	Anthomyiinae	Delia	Delia sp. 2 TG-2018, Delia platura	BOLD:AAG2511	Pest
Insecta	Diptera	Milichiidae	Madizinae	Desmometopa	Desmometopa sordida	BOLD:ACB5861	Pest
Insecta	Diptera	Milichiidae	Madizinae	Desmometopa	Desmometopa varipalpis	BOLD:ACJ1856	Pest
Insecta	Diptera	Milichiidae	Madizinae	Desmometopa	Desmometopa varipalpis	BOLD:ADM8809	Pest
Insecta	Diptera	Drosophilidae	Drosophilinae	Dettopsomyia	Dettopsomyia nigrovittata	BOLD:ADM5019	Pest
Insecta	Diptera	Muscidae	Phaoniinae	Dichaetomyia	Dichaetomyia bibax	BOLD:ABW6108	Pest
Insecta	Diptera	Muscidae	Phaoniinae	Dichaetomyia	Dichaetomyia bibax	BOLD:ACV8182	Pest
Insecta	Diptera	Limoniidae	Limoniinae	Dicranomyia	Dicranomyia cf. tristis, Dicranomyia sp., Dicranomyia tristis	BOLD:ACB7725	Pest
Insecta	Diptera	Sepsidae	Sepsinae	Dicranosepsis	Dicranosepsis cf. sauteri, Dicranosepsis cf. sauteri RM-2008	BOLD:AAX9232	Pest
Insecta	Diptera	Sepsidae	Sepsinae	Dicranosepsis	Dicranosepsis olfactoria, Dicranosepsis unipilosa	BOLD:AAX9225	Pollinator
Insecta	Diptera	Sepsidae	Sepsinae	Dicranosepsis	Dicranosepsis transita, Dicranosepsis hamata, Dicranosepsis cf. parva RM-2008, Dicranosepsis emiliae, Dicranosepsis sp. fake revocans, Dicranosepsis distincta	BOLD:AAX9223	Pollinator
Insecta	Diptera	Chironomidae	Chironominae	Dicrotendipes	Dicrotendipes sp. 2XL, Dicrotendipes nervosus	BOLD:ACB5038	Pest
Insecta	Diptera	Tachinidae	Tachininae, Dexiinae	Ceromya, Dinera	Dinera ferina, Ceromya dorsigera	BOLD:ADK5018	Parasitoid
Insecta	Diptera	Tephritidae	Tephritinae	Dioxyna	Dioxyna sororcula	BOLD:ACF4573	Parasitoid
Insecta	Diptera	Tephritidae	Tephritinae	Dioxyna	Dioxyna sororcula, Campiglossa bidentis, Dioxyna bidentis	BOLD:AAD6634	Parasitoid
Insecta	Diptera	Tephritidae	Tephritinae	Dioxyna, Campiglossa	Dioxyna sororcula, Campiglossa sororcula	BOLD:ACF4574	Parasitoid
Insecta	Diptera	Phoridae	Phorinae	Diplonevra	Diplonevra peregrina	BOLD:ACN3841	Pest
Insecta	Diptera	Phoridae	Phorinae	Dohrniphora	Dohrniphora cornuta	BOLD:AAN8680	Pest
Insecta	Diptera	Phoridae	Phorinae	Dohrniphora	Dohrniphora cornuta	BOLD:ACO6439	Pest
Insecta	Diptera	Drosophilidae	Drosophilinae	Drosophila	Drosophila barbarae, Drosophila simulans, Drosophila melanogaster, Drosophila formosana	BOLD:AAA1831	Pest
Insecta	Diptera	Drosophilidae	Drosophilinae	Drosophila	Drosophila bizonata	BOLD:ADK5220	Pest
Insecta	Diptera	Drosophilidae	Drosophilinae	Drosophila	Drosophila busckii	BOLD:AAM6803	Pest
Insecta	Diptera	Drosophilidae	Drosophilinae	Drosophila	Drosophila guangdongensis	BOLD:ADS4181	Pest
Insecta	Diptera	Drosophilidae	Drosophilinae	Drosophila	Drosophila hypocausta	BOLD:ADD4326	Pest
Insecta	Diptera	Drosophilidae	Drosophilinae	Drosophila	Drosophila immigrans	BOLD:AAI9020	Pest
Insecta	Diptera	Drosophilidae	Drosophilinae	Drosophila	Drosophila kikkawai	BOLD:AAU1325	Pest
Insecta	Diptera	Drosophilidae	Drosophilinae	Drosophila	Drosophila melanogaster	BOLD:AEA6532	Pest
Insecta	Diptera	Drosophilidae	Drosophilinae	Drosophila	Drosophila nasuta, Drosophila albomicans, Drosophila kepulauana, Drosophila neohypocausta, Drosophila neonasuta, Drosophila sulfurigaster	BOLD:AAE8038	Pest
Insecta	Diptera	Drosophilidae	Drosophilinae	Drosophila	Drosophila ohnishii, Drosophila lini	BOLD:ADK0110	Pest
Insecta	Diptera	Drosophilidae	Drosophilinae	Drosophila	Drosophila prostipennis, Drosophila nepalensis, Drosophila trilutea	BOLD:ACE9640	Pest
Insecta	Diptera	Drosophilidae	Drosophilinae	Drosophila	Drosophila pseudoananassae, Drosophila bipectinata, Drosophila parabipectinata, Drosophila malerkotliana	BOLD:AAD0155	Pest
Insecta	Diptera	Drosophilidae	Drosophilinae	Drosophila	Drosophila pulaua, Drosophila nasuta, Drosophila kohkoa, Drosophila albomicans	BOLD:ADD5141	Pest
Insecta	Diptera	Drosophilidae	Drosophilinae	Drosophila	Drosophila simulans	BOLD:AAE8098	Pest
Insecta	Diptera	Drosophilidae	Drosophilinae	Drosophila	Drosophila sp. DNAS-2C1-224666, Drosophila suzukii	BOLD:AAC2499	Pest
Insecta	Diptera	Drosophilidae	Drosophilinae	Scaptomyza, Drosophila	Drosophila sp. TAW2, Scaptomyza pallida	BOLD:AAG8493	Pest
Insecta	Diptera	Drosophilidae	Drosophilinae	Drosophila	Drosophila sulfurigaster, Drosophila kepulauana	BOLD:ADD5142	Pest
Insecta	Diptera	Drosophilidae	Drosophilinae	Drosophila	Drosophila takahashii	BOLD:AAU0289	Pest
Insecta	Diptera	Drosophilidae	Drosophilinae	Drosophila	Drosophila tani	BOLD:AAV6741	Pest
Insecta	Diptera	Drosophilidae	Drosophilinae	Drosophila	Drosophila triauraria, Drosophila auraria, Drosophila quadraria	BOLD:AAL1524	Pest
Insecta	Diptera	Anthomyiidae	Anthomyiinae	Egle	Egle inermoides, Egle groenlandica	BOLD:ACF2534	Pest
Insecta	Diptera	Anthomyiidae	Anthomyiinae	Egle	Egle rhinotmeta	BOLD:ACD2883	Pest
Insecta	Diptera	Anthomyiidae	Anthomyiinae	Egle	Egle sp., Egle parvaeformis	BOLD:AAI6226	Pest
Insecta	Diptera	Anthomyiidae	Anthomyiinae	Egle	Egle steini, Egle parva, Egle parvaeformis	BOLD:ABY5449	Pest
Insecta	Diptera	Chloropidae	Oscinellinae	Elachiptera	Elachiptera sibirica	BOLD:AAD8112	Pest
Insecta	Diptera	Chloropidae	Oscinellinae	Elachiptera	Elachiptera tuberculifera, Elachiptera sibirica	BOLD:AAD8113	Pest
Insecta	Diptera	Tephritidae	Tephritinae	Ensina	Ensina sonchi	BOLD:AAD1552	Pest
Insecta	Diptera	Mycetophilidae	Mycetophilinae	Epicypta	Epicypta limnophila	BOLD:ADB8951	Pest
Insecta	Diptera	Syrphidae	Syrphinae	Simosyrphus, Episyrphus	Episyrphus viridaureus, Simosyrphus grandicornis, Episyrphus obligatus, Episyrphus balteatus	BOLD:AAC6833	Predator
Insecta	Diptera	Syrphidae	Eristalinae	Eristalinus	Eristalinus sp. K5, Eristalinus suavissimus, Eristalinus sp. D5, Eristalinus hervebazini, Eristalinus punctulatus	BOLD:AAG4659	Predator
Insecta	Diptera	Chironomidae	Orthocladiinae	Hydrobaenus, Eukiefferiella	Eukiefferiella sp. SK-2011, Hydrobaenus dentistylus	BOLD:ACB4787	Pest
Insecta	Diptera	Syrphidae	Syrphinae	Eupeodes	Eupeodes bucculatus, Eupeodes corollae	BOLD:ADJ8357	Predator
Insecta	Diptera	Syrphidae	Syrphinae	Eupeodes	Eupeodes confrater	BOLD:ABW2487	Predator
Insecta	Diptera	Anthomyiidae	Anthomyiinae	Eustalomyia	Eustalomyia hilaris	BOLD:ACB5383	Pest
Insecta	Diptera	Anthomyiidae	Anthomyiinae	Eustalomyia	Eustalomyia vittipes, Eustalomyia sp. 28.iv.2001	BOLD:AAG2513	Pest
Insecta	Diptera	Ulidiidae	Ulidiinae	Euxesta	Euxesta pechumani	BOLD:AAP2708	Pest
Insecta	Diptera	Tachinidae	Exoristinae	Exorista	Exorista hyalipennis	BOLD:ACH9143	Parasitoid
Insecta	Diptera	Tachinidae	Exoristinae	Exorista	Exorista japonica	BOLD:ACB4985	Parasitoid
Insecta	Diptera	Tachinidae	Exoristinae	Exorista	Exorista larvarum, Exorista sp. JOS1, Exorista mella, Exorista sp. JOS2	BOLD:AAG2107	Parasitoid
Insecta	Diptera	Tachinidae	Exoristinae	Exorista	Exorista larvarum, Exorista thula, Exorista fasciata	BOLD:ACF5729	Parasitoid
Insecta	Diptera	Fanniidae		Fannia	Fannia prisca	BOLD:ABW5579	Pest
Insecta	Diptera	Fanniidae		Fannia	Fannia prisca, Fannia sp3, Fannia nigra, Fannia sp.	BOLD:ACJ6083	Pest
Insecta	Diptera	Fanniidae		Fannia	Fannia pusio	BOLD:AAP1130	Pest
Insecta	Diptera	Cecidomyiidae	Cecidomyiinae	Feltiella	Feltiella acarisuga	BOLD:ACD4136	Predator
Insecta	Diptera	Cecidomyiidae	Cecidomyiinae	Feltiella	Feltiella acarisuga	BOLD:ACD4170	Pest
Insecta	Diptera	Ceratopogonidae	Forcipomyiinae	Forcipomyia	Forcipomyia bikanni	BOLD:ADB8555	Pest
Insecta	Diptera	Ceratopogonidae	Forcipomyiinae	Forcipomyia	Forcipomyia taiwana	BOLD:ACQ6088	Pest
Insecta	Diptera	Chironomidae	Chironominae	Glyptotendipes, Chironomus	Glyptotendipes tokunagai, Chironomus sp. 3, Chironomus sulfurosus	BOLD:ACH4991	Pest
Insecta	Diptera	Muscidae	Mydaeinae	Graphomya	Graphomya rufitibia	BOLD:ACA4642	Pest
Insecta	Diptera	Muscidae	Mydaeinae	Graphomya	Graphomya rufitibia	BOLD:ADK3570	Pest
Insecta	Diptera	Tachinidae	Phasiinae	Gymnosoma	Gymnosoma inornatum, Gymnosoma nudifrons, Gymnosoma clavatum, Gymnosoma dolycoridis, Gymnosoma sylvaticum, Gymnosoma costatum, Gymnosoma cf. inornatum, Gymnosoma acrosterni, Gymnosoma cf. dolycoridis, Gymnosoma nr. inornatum, Gymnosoma rotundatum	BOLD:ADK2725	Parasitoid
Insecta	Diptera	Tachinidae	Phasiinae	Gymnosoma		BOLD:AAV0936
Insecta	Diptera	Muscidae	Muscinae	Haematobosca	Haematobosca sanguinolenta	BOLD:AAI6535	Pest
Insecta	Diptera	Chironomidae	Chironominae	Harnischia	Harnischia ohmuraensis	BOLD:ADV6667	Pest
Insecta	Diptera	Syrphidae	Eristalinae	Phytomia, Eristalinus, Helophilus	Helophilus hybridus, Phytomia sp. COI7	BOLD:AAU6733	Predator
Insecta	Diptera	Calliphoridae	Luciliinae	Hemipyrellia	Hemipyrellia fernandica	BOLD:ACC3953	Pest
Insecta	Diptera	Calliphoridae	Luciliinae	Hemipyrellia	Hemipyrellia ligurriens, Hemipyrellia pulchra, Hemipyrellia sp. KR-2011	BOLD:AAE4423	Pest
Insecta	Diptera	Stratiomyidae	Hermetiinae	Hermetia	Hermetia illucens	BOLD:AAD0622	Pest
Insecta	Diptera	Stratiomyidae	Hermetiinae	Hermetia	Hermetia illucens	BOLD:ACF0943	Pest
Insecta	Diptera	Chironomidae	Orthocladiinae	Hydrobaenus	Hydrobaenus conformis	BOLD:AAE1908	Pest
Insecta	Diptera	Anthomyiidae	Anthomyiinae	Hydrophoria	Hydrophoria ruralis, Hydrophoria silvicola	BOLD:ACD2354	Pest
Insecta	Diptera	Muscidae	Azeliinae	Hydrotaea	Hydrotaea chalcogaster, Hydrotaea sp. CSU160701CB83	BOLD:AAW9286	Pest
Insecta	Diptera	Syrphidae	Syrphinae	Ischiodon, Simosyrphus	Ischiodon scutellaris, Simosyrphus grandicornis, Simosyrphus scutellaris	BOLD:AAE5566	Predator
Insecta	Diptera	Chironomidae	Chironominae	Kiefferulus	Kiefferulus tainanus, Kiefferulus barbatitarsis	BOLD:AAI7979	Pest
Insecta	Diptera	Anthomyiidae	Anthomyiinae	Lasiomma	Lasiomma octomaculatum	BOLD:ACN3757	Pest
Insecta	Diptera	Anthomyiidae	Anthomyiinae	Lasiomma	Lasiomma picipes, Lasiomma octoguttatum, Lasiomma nr. picipes	BOLD:ACZ5374	Pest
Insecta	Diptera	Cecidomyiidae	Cecidomyiinae	Lauthia	Lauthia cardui	BOLD:ABV9329	Pest
Insecta	Diptera	Drosophilidae	Steganinae	Leucophenga	Leucophenga helvipecta	BOLD:ACC3427	Pest
Insecta	Diptera	Drosophilidae	Steganinae	Leucophenga	Leucophenga maculata	BOLD:ACR6910	Pest
Insecta	Diptera	Tachinidae	Phasiinae	Leucostoma	Leucostoma aterrimum, Leucostoma sp. 1	BOLD:ACK5706	Predator
Insecta	Diptera	Muscidae	Coenosiinae	Limnophora		BOLD:ACN3496
Insecta	Diptera	Chironomidae	Orthocladiinae	Limnophyes	Limnophyes minimus	BOLD:AEA7139	Pest
Insecta	Diptera	Sphaeroceridae	Limosininae	Limosina	Limosina silvatica	BOLD:ACO7049	Pest
Insecta	Diptera	Agromyzidae	Phytomyzinae, Agromyzinae	Liriomyza	Liriomyza huidobrensis, Liriomyza trifolii, Liriomyza sativae	BOLD:AAJ2102	Pest
Insecta	Diptera	Muscidae	Coenosiinae	Lispe	Lispe assimilis	BOLD:AAZ1114	Pest
Insecta	Diptera	Muscidae	Coenosiinae	Lispe	Lispe leucospila, Lispe eidsvoldica	BOLD:AAG6857	Pest
Insecta	Diptera	Muscidae	Coenosiinae	Lispe	Lispe orientalis	BOLD:AAX6414	Pest
Insecta	Diptera	Muscidae	Coenosiinae	Lispe	Lispe pumila	BOLD:ACV4754	Pest
Insecta	Diptera	Muscidae	Coenosiinae	Lispe	Lispe pygmaea	BOLD:ACD2267	Pest
Insecta	Diptera	Muscidae	Coenosiinae	Lispe	Lispe sericipalpis, Lispe orientalis	BOLD:ACI9613	Pest
Insecta	Diptera	Muscidae	Coenosiinae	Lispe	Lispe sericipalpis, Lispe orientalis	BOLD:ACW5365	Pest
Insecta	Diptera	Muscidae	Coenosiinae	Lispe	Lispe sp., Lispe pectinipes	BOLD:ABW5492	Pest
Insecta	Diptera	Muscidae	Coenosiinae	Lispocephala	Lispocephala miki	BOLD:ACV6987	Pest
Insecta	Diptera	Calliphoridae	Luciliinae	Lucilia	Lucilia ampullacea, Lucilia illustris, Chrysomya megacephala, Lucilia porphyrina	BOLD:AAC3450	Pest
Insecta	Diptera	Calliphoridae	Luciliinae	Lucilia	Lucilia cf. caesarillustris INMLP 250, Lucilia caesarillustris, Lucilia cf. caesarillustris INMLP 262, Lucilia cf. caesarillustris INMLP 241, Lucilia cf. caesarillustris INMLP 256, Lucilia caesar, Lucilia cf. caesarillustris INMLP 255, Lucilia cf. caesarillustris INMLP 261, Lucilia cf. caesarillustris INMLP 260, Lucilia cf. caesarillustris INMLP 263, Lucilia illustris, Lucilia cf. caesarillustris…	BOLD:AAA7470	Pest
Insecta	Diptera	Calliphoridae	Luciliinae	Lucilia	Lucilia cuprina DI190.1, Lucilia magnicornis, Lucilia cuprina x sericata, Lucilia silvarum, Lucilia sericata, Hemipyrellia ligurriens, Lucilia taiyuanensis, Lucilia sp. O77, Phormia regina, Lucilia sericata Bristol colony, Lucilia cuprina, Lucilia illustris, Lucilia chini, Lucilia sp. MATM-2012	BOLD:AAA6618	Pest
Insecta	Diptera	Calliphoridae	Luciliinae	Hypopygiopsis, Lucilia	Lucilia hainanensis, Lucilia bazini, Hypopygiopsis infumata	BOLD:AAJ2052	Pest
Insecta	Diptera	Calliphoridae	Luciliinae	Lucilia	Lucilia papuensis	BOLD:AAF0222	Pest
Insecta	Diptera	Calliphoridae	Luciliinae	Lucilia	Lucilia papuensis	BOLD:ACD6729	Pest
Insecta	Diptera	Calliphoridae	Luciliinae	Lucilia	Lucilia shenyangensis	BOLD:ADK4266	Pest
Insecta	Diptera	Culicidae	Culicinae	Lutzia	Lutzia fuscanus, Lutzia fuscana, Lutzia sp. CM form, Lutzia halifaxii	BOLD:AAG3834	Pest
Insecta	Diptera	Keroplatidae	Macrocerinae	Macrocera	Macrocera pusilla	BOLD:AAM9013	Pest
Insecta	Diptera	Phoridae	Metopininae	Megaselia	Megaselia albicans	BOLD:ACF7689	Pest
Insecta	Diptera	Phoridae	Metopininae	Megaselia	Megaselia meconicera	BOLD:ABW5511	Pest
Insecta	Diptera	Phoridae	Metopininae	Megaselia	Megaselia tamilnaduensis	BOLD:ADK4033	Pest
Insecta	Diptera	Syrphidae	Syrphinae	Melanostoma	Melanostoma fasciatum	BOLD:ABY6279	Predator
Insecta	Diptera	Syrphidae	Syrphinae	Platycheirus, Melanostoma, Ceriana, Lejogaster	Melanostoma scalare, Melanostoma sp. A, Melanostoma sp. B, Melanostoma mellinum-agg., Melanostoma orientale, Melanostoma dubium, Melanostoma sp. NIBIO 15LA-02, Melanostoma mellinum, Melanostoma sp. BOLDAAB2866	BOLD:AAB2866	Predator
Insecta	Diptera	Calliphoridae	Luciliinae, Melanomyinae	Melinda, Lucilia	Melinda pusilla	BOLD:ACN1129	Pest
Insecta	Diptera	Chironomidae	Chironominae	Microchironomus	Microchironomus tabarui	BOLD:ACQ8342	Pest
Insecta	Diptera	Chironomidae	Chironominae	Microchironomus	Microchironomus tener	BOLD:ADH1469	Pest
Insecta	Diptera	Stratiomyidae	Sarginae	Microchrysa	Microchrysa flaviventris	BOLD:AAG0257	Pest
Insecta	Diptera	Milichiidae	Milichiinae	Milichiella	Milichiella lacteipennis	BOLD:AAG7056	Pest
Insecta	Diptera	Chironomidae	Tanypodinae	Monopelopia		BOLD:ADC6287
Insecta	Diptera	Muscidae	Muscinae	Musca	Musca conducens, Musca asiatica	BOLD:AAX3121	Pest
Insecta	Diptera	Muscidae	Muscinae	Musca	Musca confiscata	BOLD:AAX3118	Pest
Insecta	Diptera	Muscidae	Muscinae	Musca	Musca convexifrons	BOLD:AAX3117	Pest
Insecta	Diptera	Muscidae	Muscinae	Musca	Musca crassirostris	BOLD:AAF6545	Pest
Insecta	Diptera	Muscidae	Muscinae	Musca	Musca larvipara, Musca domestica, Musca sp. 73 AV-2017, Musca sorbens	BOLD:AAA6021	Pest
Insecta	Diptera	Muscidae	Muscinae	Musca	Musca lucidula, Musca domestica, Musca albina, Musca sorbens	BOLD:AAA6020	Pest
Insecta	Diptera	Muscidae	Muscinae	Musca	Musca ventrosa	BOLD:AAX3130	Pest
Insecta	Diptera	Muscidae	Azeliinae	Muscina	Muscina japonica	BOLD:ACZ3011	Pest
Insecta	Diptera	Muscidae	Azeliinae	Muscina	Muscina pascuorum	BOLD:AAG1714	Pest
Insecta	Diptera	Drosophilidae	Drosophilinae	Mycodrosophila	Mycodrosophila gratiosa	BOLD:ADT3564	Pest
Insecta	Diptera	Mycetophilidae	Mycomyinae	Mycomya	Mycomya occultans	BOLD:AAY8346	Pest
Insecta	Diptera	Tachinidae	Exoristinae	Nemorilla	Nemorilla maculosa	BOLD:ADV4946	Parasitoid
Insecta	Diptera	Muscidae	Muscinae	Neomyia	Neomyia indica	BOLD:ACP5510	Pest
Insecta	Diptera	Muscidae	Muscinae	Neomyia	Neomyia yunnanensis, Neomyia timorensis	BOLD:AAX5910	Pest
Insecta	Diptera	Chironomidae	Chironominae	Neozavrelia		BOLD:ACY3205
Insecta	Diptera	Cecidomyiidae	Winnertziinae	Nikandria	Nikandria brevitarsis	BOLD:ACR0116	Pest
Insecta	Diptera	Ephydridae	Ilytheinae	Nostima	Nostima picta	BOLD:ADV7457	Pest
Insecta	Diptera	Ephydridae	Ilytheinae	Nostima	Nostima picta, Nostima approximata	BOLD:AAG2754	Pest
Insecta	Diptera	Sphaeroceridae	Limosininae	Opalimosina	Opalimosina mirabilis	BOLD:AAN6406	Pest
Insecta	Diptera	Agromyzidae	Agromyzinae	Ophiomyia	Ophiomyia lantanae	BOLD:AAW9154	Pest
Insecta	Diptera	Muscidae	Coenosiinae	Orchisia	Orchisia costata	BOLD:ABX0213	Pest
Insecta	Diptera	Dolichopodidae	Dolichopodinae	Paraclius	Paraclius digitatus	BOLD:ACM3123	Pest
Insecta	Diptera	Syrphidae	Syrphinae	Paragus	Paragus haemorrhous, Paragus politus, Paragus coadunatus, Paragus rufocincta, Paragus constrictus, Paragus tibialis, Paragus aff. haemorrhous, Paragus cf. haemorrhous, Paragus ascoensis	BOLD:ABZ4619	Predator
Insecta	Diptera	Syrphidae	Syrphinae	Paragus	Paragus hermomensis, Paragus antoinettae	BOLD:AAZ8968	Predator
Insecta	Diptera	Syrphidae	Syrphinae	Paragus	Paragus serratus, Paragus crenulatus, Paragus crenulatus II	BOLD:AAG4649	Predator
Insecta	Diptera	Chironomidae	Chironominae	Paratendipes	Paratendipes nigorofasciatus	BOLD:ADR3659	Pest
Insecta	Diptera	Anthomyiidae	Pegomyinae	Pegomya	Pegomya flavifrons	BOLD:AAG6754	Pest
Insecta	Diptera	Anthomyiidae	Pegomyinae	Pegomya	Pegomya rugulosa, Pegomya bicolor bicolor	BOLD:ACM1176	Pest
Insecta	Diptera	Tachinidae	Tachininae	Peribaea	Peribaea tibialis	BOLD:ACB1892	Parasitoid
Insecta	Diptera	Ephydridae	Ilytheinae	Philygria	Philygria vittipennis	BOLD:AAP6349	Pest
Insecta	Diptera	Tachinidae	Exoristinae	Phorinia	Phorinia flava	BOLD:ACH9513	Parasitoid
Insecta	Diptera	Tachinidae	Exoristinae	Phorocera	Phorocera slossonae	BOLD:AAP4830	Pest
Insecta	Diptera	Drosophilidae	Steganinae	Phortica	Phortica haba	BOLD:ACK4624	Pest
Insecta	Diptera	Drosophilidae	Steganinae	Phortica	Phortica okadai, Phortica kappa, Phortica conifera, Phortica chi, Phortica saeta, Phortica psi, Phortica iota, Phortica archikappa, Phortica tau, Phortica liukuni	BOLD:ACK5416	Pest
Insecta	Diptera	Drosophilidae	Steganinae	Phortica	Phortica speculum	BOLD:AAY0673	Pest
Insecta	Diptera	Ulidiidae	Ulidiinae	Physiphora	Physiphora aenea, Physiphora clausa	BOLD:AAG6922	Pest
Insecta	Diptera	Agromyzidae	Phytomyzinae	Phytoliriomyza		BOLD:AAV4859
Insecta	Diptera	Agromyzidae	Phytomyzinae	Phytoliriomyza		BOLD:ABX2113
Insecta	Diptera	Chironomidae	Chironominae	Polypedilum	Polypedilum cf. okiharaki	BOLD:ADD1176	Pest
Insecta	Diptera	Chironomidae	Chironominae	Polypedilum	Polypedilum convexum	BOLD:ACX2279	Pest
Insecta	Diptera	Chironomidae	Chironominae	Polypedilum	Polypedilum cultellatum	BOLD:ACX8040	Pest
Insecta	Diptera	Chironomidae	Chironominae	Polypedilum	Polypedilum cultellatum	BOLD:ACX8041	Pest
Insecta	Diptera	Chironomidae	Chironominae	Polypedilum	Polypedilum decematogttatum	BOLD:ACV3535	Pest
Insecta	Diptera	Chironomidae	Chironominae	Polypedilum	Polypedilum japonicum	BOLD:ACV3483	Pest
Insecta	Diptera	Chironomidae	Chironominae	Polypedilum	Polypedilum japonicum	BOLD:ACV3484	Pest
Insecta	Diptera	Chironomidae	Chironominae	Polypedilum	Polypedilum japonicum	BOLD:ADU3767	Pest
Insecta	Diptera	Chironomidae	Chironominae	Polypedilum	Polypedilum masudai	BOLD:ACV4202	Pest
Insecta	Diptera	Chironomidae	Chironominae	Polypedilum	Polypedilum scalaenum, Polypedilum cf. lucidum	BOLD:ADF3189	Pest
Insecta	Diptera	Chironomidae	Chironominae	Polypedilum	Polypedilum sp. 1 WHW2014, Polypedilum cf. tobaseptimum, Polypedilum sp., Polypedilum crassistyla	BOLD:ACQ5096	Pest
Insecta	Diptera	Chironomidae	Chironominae	Polypedilum	Polypedilum uncinatum	BOLD:ACX1689	Pest
Insecta	Diptera	Chironomidae	Tanypodinae	Procladius	Procladius choreus, Procladius sp. 8XL	BOLD:ACB4698	Pest
Insecta	Diptera	Chironomidae	Tanypodinae	Procladius	Procladius culiciformis, Procladius sp. 5XL, Procladius choreus	BOLD:ACB6320	Pest
Insecta	Diptera	Chironomidae	Tanypodinae	Procladius		BOLD:ADC7931
Insecta	Diptera	Chironomidae	Orthocladiinae	Psectrocladius	Psectrocladius schlienzi	BOLD:AAU6327	Pest
Insecta	Diptera	Psychodidae	Psychodinae	Psychoda	Psychoda alternata, Psychoda sp. 1 TG-2018	BOLD:AAF9306	Pest
Insecta	Diptera	Psychodidae	Psychodinae	Psychoda		BOLD:AAU7263
Insecta	Diptera	Psychodidae	Psychodinae	Psychoda	Psychoda uncinula	BOLD:ACD9559	Pest
Insecta	Diptera	Stratiomyidae	Sarginae	Ptecticus	Ptecticus aurifer	BOLD:AAU6732	Pest
Insecta	Diptera	Sphaeroceridae	Limosininae	Pullimosina	Pullimosina heteroneura	BOLD:AAP3626	Pest
Insecta	Diptera	Sphaeroceridae	Limosininae	Leptocera, Rachispoda	Rachispoda sp. 1, Leptocera nigra, Rachispoda PK04, Rachispoda sp. 4	BOLD:AAG6826	Pest
Insecta	Diptera	Sphaeroceridae	Limosininae	Rachispoda		BOLD:ABX9851
Insecta	Diptera	Chironomidae	Orthocladiinae	Rheocricotopus		BOLD:ADR2796
Insecta	Diptera	Chironomidae	Chironominae	Rheotanytarsus		BOLD:ADP1196
Insecta	Diptera	Chloropidae	Rhodesiellinae	Rhodesiella	Rhodesiella nitidifrons	BOLD:AAI0424	Pest
Insecta	Diptera	Chloropidae	Rhodesiellinae	Rhodesiella		BOLD:AAJ4406
Insecta	Diptera	Platystomatidae	Platystomatinae	Rivellia	Rivellia apicalis	BOLD:ACO0990	Pest
Insecta	Diptera	Platystomatidae	Platystomatinae	Rivellia	Rivellia basilaris	BOLD:AAC4186	Pest
Insecta	Diptera	Sarcophagidae	Sarcophaginae	Sarcophaga	Sarcophaga albiceps, Sarcophaga crassipalpis, Sarcophaga misera	BOLD:AAE9461	Pest
Insecta	Diptera	Sarcophagidae	Sarcophaginae	Sarcophaga	Sarcophaga albiceps, Sarcophaga misera	BOLD:AAB4496	Pest
Insecta	Diptera	Sarcophagidae	Sarcophaginae	Sarcophaga	Sarcophaga aratrix, Sarcophaga similis, Sarcophaga crassipalpis	BOLD:ACB4532	Pest
Insecta	Diptera	Sarcophagidae	Sarcophaginae	Sarcophaga	Sarcophaga caudagalli	BOLD:ACX8659	Pest
Insecta	Diptera	Sarcophagidae	Sarcophaginae	Sarcophaga	Sarcophaga caudagalli	BOLD:ADJ9942	Pest
Insecta	Diptera	Sarcophagidae	Sarcophaginae	Sarcophaga	Sarcophaga depressifrons	BOLD:ADK2993	Pest
Insecta	Diptera	Sarcophagidae	Sarcophaginae	Sarcophaga	Sarcophaga dux, Sarcophaga brevicornis	BOLD:AAC4539	Pest
Insecta	Diptera	Sarcophagidae	Sarcophaginae	Sarcophaga	Sarcophaga gravelyi, Sarcophaga amicoides	BOLD:ACH7953	Pest
Insecta	Diptera	Sarcophagidae	Sarcophaginae	Sarcophaga	Sarcophaga hainanensis	BOLD:ACW2759	Pest
Insecta	Diptera	Sarcophagidae	Sarcophaginae	Sarcophaga	Sarcophaga hirtipes, Sarcophaga albiceps	BOLD:ABY5605	Pest
Insecta	Diptera	Sarcophagidae	Sarcophaginae	Sarcophaga	Sarcophaga iwuensis	BOLD:ADK7599	Pest
Insecta	Diptera	Sarcophagidae	Sarcophaginae	Sarcophaga	Sarcophaga josephi	BOLD:ADK7786	Pest
Insecta	Diptera	Sarcophagidae	Sarcophaginae	Sarcophaga	Sarcophaga kempi, Sarcophaga sp. S134, Sarcophaga sp. S102	BOLD:AAX9407	Pest
Insecta	Diptera	Sarcophagidae	Sarcophaginae	Sarcophaga	Sarcophaga peregrina, Sarcophaga krathonmai, Sarcophaga javanica, Sarcophaga formosensis, Sarcophaga nathani	BOLD:AAA6022	Pest
Insecta	Diptera	Sarcophagidae	Sarcophaginae	Sarcophaga	Sarcophaga scopariiformis	BOLD:AAF1378	Pest
Insecta	Diptera	Sarcophagidae	Sarcophaginae	Sarcophaga	Sarcophaga tuberosa	BOLD:ADK7409	Pest
Insecta	Diptera	Syrphidae	Syrphinae	Scaeva	Scaeva pyrastri	BOLD:ADL6253	Predator
Insecta	Diptera	Drosophilidae	Drosophilinae	Scaptomyza	Scaptomyza pallida	BOLD:ADS9465	Pest
Insecta	Diptera	Drosophilidae	Drosophilinae	Scaptomyza, Drosophila	Scaptomyza pallida, Scaptomyza sp. Dip_32 AV-2017	BOLD:ACE9016	Pest
Insecta	Diptera	Ephydridae	Ephydrinae	Scatella	Scatella lutosa, Scatella tenuicosta, Scatella stagnalis	BOLD:ACZ6583	Pest
Insecta	Diptera	Sciaridae		Sciara	Sciara hamatilis, Sciara humeralis	BOLD:AAH3914	Pest
Insecta	Diptera	Sciaridae		Sciara	Sciara obliquicapilli, Sciara ruficauda	BOLD:ACD7223	Pest
Insecta	Diptera	Sciaridae		Sciara	Sciara sp. 1 JS-2017, Sciara bryophila	BOLD:ADD2461	Pest
Insecta	Diptera	Sepsidae	Sepsinae	Sepsis	Sepsis monostigma	BOLD:ACS2530	Pest
Insecta	Diptera	Sepsidae	Sepsinae	Sepsis	Sepsis punctum	BOLD:ACS2531	Pest
Insecta	Diptera	Simuliidae	Simuliinae	Simulium	Simulium quinquestriatum	BOLD:ABX6791	Pest
Insecta	Diptera	Tachinidae	Tachininae	Siphona	Siphona paludosa	BOLD:ACA9865	Parasitoid
Insecta	Diptera	Chloropidae	Oscinellinae	Siphunculina	Siphunculina aenea	BOLD:ACB5467	Predator
Insecta	Diptera	Chironomidae	Orthocladiinae	Smittia	Smittia aterrima	BOLD:AEA7084	Pest
Insecta	Diptera	Chironomidae	Orthocladiinae	Smittia	Smittia leucopogon	BOLD:ABW7981	Pest
Insecta	Diptera	Chironomidae	Orthocladiinae	Smittia	Smittia leucopogon	BOLD:ADX6371	Pest
Insecta	Diptera	Chironomidae	Orthocladiinae	Smittia	Smittia sp. DNAS-33A-250225, Smittia aterrima	BOLD:AAN5356	Pest
Insecta	Diptera	Tephritidae	Tephritinae	Spathulina	Spathulina acroleuca, Spathulina ochroleuca	BOLD:ACV1733	Pest
Insecta	Diptera	Tephritidae	Tephritinae	Sphaeniscus	Sphaeniscus atilius	BOLD:ACS9938	Pest
Insecta	Diptera	Syrphidae	Syrphinae	Sphaerophoria	Sphaerophoria bankowskae, Sphaerophoria infuscata, Sphaerophoria rueppelli, Sphaerophoria nr. philanthus, Sphaerophoria batava, Sphaerophoria sp., Sphaerophoria rueppellii, Sphaerophoria interrupta-group, Sphaerophoria sp. MA-1, Sphaerophoria cleoae, Sphaerophoria asymmetrica, Sphaerophoria cranbrookensis, Sphaerophoria fatarum, Sphaerophoria bengalensis, Sphaerophoria bifurcata, Sphaerophoria ta…	BOLD:AAA7374	Predator
Insecta	Diptera	Muscidae	Coenosiinae	Spilogona	Spilogona tendipes	BOLD:AAP9047	Pest
Insecta	Diptera	Lauxaniidae	Lauxaniinae	Steganopsis	Steganopsis melanogaster	BOLD:AAP3488	Pest
Insecta	Diptera	Chironomidae	Chironominae	Stempellinella	Stempellinella coronata	BOLD:AAH9939	Pest
Insecta	Diptera	Ceratopogonidae	Ceratopogoninae	Stilobezzia		BOLD:ADK2627
Insecta	Diptera	Rhiniidae		Stomorhina	Stomorhina discolor	BOLD:AAG7049	Pest
Insecta	Diptera	Rhiniidae		Stomorhina	Stomorhina obsoleta, Stomorhina discolor	BOLD:ACE8294	Pest
Insecta	Diptera	Muscidae	Muscinae	Stomoxys	Stomoxys calcitrans	BOLD:AAA3181	Pest
Insecta	Diptera	Muscidae	Muscinae	Stomoxys	Stomoxys calcitrans, Stomoxys indicus	BOLD:ACI1304	Pest
Insecta	Diptera	Muscidae	Muscinae	Stomoxys	Stomoxys uruma	BOLD:AAF3270	Pest
Insecta	Diptera	Dolichopodidae	Dolichopodinae, Sympycninae	Syntormon, Hercostomus	Syntormon flexibile	BOLD:AEB6883	Pest
Insecta	Diptera	Tabanidae	Tabaninae	Tabanus	Tabanus marginalis	BOLD:AAH9538	Pest
Insecta	Diptera	Chironomidae	Tanypodinae	Tanypus	Tanypus chinensis	BOLD:ADC7018	Pest
Insecta	Diptera	Chironomidae	Tanypodinae	Tanypus	Tanypus kraatzi	BOLD:ACV5726	Pest
Insecta	Diptera	Chironomidae	Chironominae	Tanytarsus	Tanytarsus formosanus	BOLD:ADM3265	Pest
Insecta	Diptera	Chironomidae	Chironominae	Tanytarsus	Tanytarsus oscillans, Tanytarsus kiseogi, Tanytarsus unagiseptimus	BOLD:ACB5344	Pest
Insecta	Diptera	Chironomidae	Chironominae	Tanytarsus	Tanytarsus pollexus	BOLD:ACR5734	Pest
Insecta	Diptera	Chironomidae	Chironominae	Tanytarsus	Tanytarsus shouautumnalis	BOLD:ADL4539	Pest
Insecta	Diptera	Chironomidae	Chironominae	Tanytarsus	Tanytarsus tamaundecimus	BOLD:ACB5330	Pest
Insecta	Diptera	Sphaeroceridae	Limosininae	Telomerina	Telomerina flavipes	BOLD:ACJ1971	Pest
Insecta	Diptera	Mycetophilidae	Gnoristinae	Tetragoneura	Tetragoneura ruuhijarvii	BOLD:ACW3965	Pest
Insecta	Diptera	Chloropidae	Chloropinae	Thaumatomyia	Thaumatomyia pulla	BOLD:AAG9240	Parasitoid
Insecta	Diptera	Chloropidae	Chloropinae	Thaumatomyia	Thaumatomyia pulla, Thaumatomyia hallandica	BOLD:AAG9241	Parasitoid
Insecta	Diptera	Tachinidae	Dexiinae	Thelaira	Thelaira nigripes, Thelaira nigrina	BOLD:ACD1435	Parasitoid
Insecta	Diptera	Chironomidae	Orthocladiinae	Thienemanniella		BOLD:AAO7612
Insecta	Diptera	Chironomidae	Orthocladiinae	Thienemanniella		BOLD:ADF7688
Insecta	Diptera	Pipunculidae	Pipunculinae	Tomosvaryella	Tomosvaryella palliditarsis, Tomosvaryella sp. AK4	BOLD:AAO3574	Predator
Insecta	Diptera	Pipunculidae	Pipunculinae	Tomosvaryella		BOLD:AAG3775
Insecta	Diptera	Pipunculidae	Pipunculinae	Tomosvaryella		BOLD:AAO3577
Insecta	Diptera	Tachinidae	Exoristinae	Vibrissina	Vibrissina turrita	BOLD:ACL8661	Parasitoid
Insecta	Diptera	Chironomidae	Tanypodinae	Zavrelimyia	Zavrelimyia dolosa, Zavrelimyia divisa	BOLD:ACX5080	Pest
Insecta	Diptera	Chironomidae	Tanypodinae	Zavrelimyia		BOLD:ACC5189
Insecta	Diptera	Tephritidae	Dacinae	Zeugodacus, Bactrocera	Zeugodacus cucurbitae, Bactrocera carambolae, Bactrocera cucurbitae, Bactrocera sp. 1, Bactrocera Sp.22	BOLD:AAA5439	Pest
Insecta	Diptera	Agromyzidae	Agromyzinae	Melanagromyza		BOLD:ABX2154
Insecta	Diptera	Agromyzidae	Agromyzinae	Ophiomyia		BOLD:ACN4131
Insecta	Diptera	Agromyzidae				BOLD:ABZ8478
Insecta	Diptera	Agromyzidae				BOLD:ACG2026
Insecta	Diptera	Agromyzidae				BOLD:ACM7453
Insecta	Diptera	Agromyzidae				BOLD:ACO5845
Insecta	Diptera	Agromyzidae				BOLD:ACO9691
Insecta	Diptera	Agromyzidae				BOLD:ACU7796
Insecta	Diptera	Agromyzidae				BOLD:ACW9222
Insecta	Diptera	Agromyzidae				BOLD:ACX7007
Insecta	Diptera	Agromyzidae				BOLD:ACY5745
Insecta	Diptera	Agromyzidae				BOLD:ACY5966
Insecta	Diptera	Agromyzidae				BOLD:ACY6196
Insecta	Diptera	Agromyzidae				BOLD:ADC1362
Insecta	Diptera	Agromyzidae				BOLD:ADH1874
Insecta	Diptera	Agromyzidae				BOLD:ADH3181
Insecta	Diptera	Agromyzidae				BOLD:ADM4117
Insecta	Diptera	Agromyzidae				BOLD:ADS4134
Insecta	Diptera	Agromyzidae				BOLD:ADU0050
Insecta	Diptera	Agromyzidae				BOLD:ADU6542
Insecta	Diptera	Agromyzidae				BOLD:ADV6764
Insecta	Diptera	Anthomyiidae	Anthomyiinae	Anthomyia		BOLD:ABW5575
Insecta	Diptera	Anthomyiidae	Anthomyiinae	Egle		BOLD:AAL7521
Insecta	Diptera	Anthomyiidae	Anthomyiinae	Lasiomma		BOLD:ACI2757
Insecta	Diptera	Anthomyiidae	Pegomyinae	Pegomya		BOLD:ACB2221
Insecta	Diptera	Anthomyiidae	Pegomyinae	Pegomya		BOLD:ACR3394
Insecta	Diptera	Anthomyiidae				BOLD:ACZ4820
Insecta	Diptera	Asilidae				BOLD:ADH3056
Insecta	Diptera	Bombyliidae				BOLD:ACW7616
Insecta	Diptera	Calliphoridae	Luciliinae	Lucilia		BOLD:ADV0410
Insecta	Diptera	Calliphoridae				BOLD:AAH3036
Insecta	Diptera	Calliphoridae				BOLD:ACV2943
Insecta	Diptera	Calliphoridae				BOLD:ADG8167
Insecta	Diptera	Calliphoridae				BOLD:ADS8186
Insecta	Diptera	Calliphoridae				BOLD:ADV0612
Insecta	Diptera	Cecidomyiidae	Cecidomyiinae	Asteromyia		BOLD:ADF8569
Insecta	Diptera	Cecidomyiidae	Cecidomyiinae			BOLD:ACF6805
Insecta	Diptera	Cecidomyiidae	Cecidomyiinae			BOLD:ACW1636
Insecta	Diptera	Cecidomyiidae	Cecidomyiinae			BOLD:ADU0964
Insecta	Diptera	Cecidomyiidae				BOLD:AAG6405
Insecta	Diptera	Cecidomyiidae				BOLD:AAH3664
Insecta	Diptera	Cecidomyiidae				BOLD:AAH3671
Insecta	Diptera	Cecidomyiidae				BOLD:AAH3700
Insecta	Diptera	Cecidomyiidae				BOLD:AAN5227
Insecta	Diptera	Cecidomyiidae				BOLD:AAO7694
Insecta	Diptera	Cecidomyiidae				BOLD:AAV5768
Insecta	Diptera	Cecidomyiidae				BOLD:AAY6447
Insecta	Diptera	Cecidomyiidae				BOLD:ABV1375
Insecta	Diptera	Cecidomyiidae				BOLD:ABW5482
Insecta	Diptera	Cecidomyiidae				BOLD:ABW5559
Insecta	Diptera	Cecidomyiidae				BOLD:ABW7982
Insecta	Diptera	Cecidomyiidae				BOLD:ABW9324
Insecta	Diptera	Cecidomyiidae				BOLD:ABW9593
Insecta	Diptera	Cecidomyiidae				BOLD:ABX2817
Insecta	Diptera	Cecidomyiidae				BOLD:ABX2821
Insecta	Diptera	Cecidomyiidae				BOLD:ABX4964
Insecta	Diptera	Cecidomyiidae				BOLD:ABX6103
Insecta	Diptera	Cecidomyiidae				BOLD:ACA3953
Insecta	Diptera	Cecidomyiidae				BOLD:ACA6263
Insecta	Diptera	Cecidomyiidae				BOLD:ACA6463
Insecta	Diptera	Cecidomyiidae				BOLD:ACC0852
Insecta	Diptera	Cecidomyiidae				BOLD:ACC8303
Insecta	Diptera	Cecidomyiidae				BOLD:ACD9843
Insecta	Diptera	Cecidomyiidae				BOLD:ACE1218
Insecta	Diptera	Cecidomyiidae				BOLD:ACF8536
Insecta	Diptera	Cecidomyiidae				BOLD:ACF9251
Insecta	Diptera	Cecidomyiidae				BOLD:ACG1226
Insecta	Diptera	Cecidomyiidae				BOLD:ACI5810
Insecta	Diptera	Cecidomyiidae				BOLD:ACK7321
Insecta	Diptera	Cecidomyiidae				BOLD:ACM0918
Insecta	Diptera	Cecidomyiidae				BOLD:ACM7256
Insecta	Diptera	Cecidomyiidae				BOLD:ACM7525
Insecta	Diptera	Cecidomyiidae				BOLD:ACM7697
Insecta	Diptera	Cecidomyiidae				BOLD:ACM7977
Insecta	Diptera	Cecidomyiidae				BOLD:ACM8215
Insecta	Diptera	Cecidomyiidae				BOLD:ACM8352
Insecta	Diptera	Cecidomyiidae				BOLD:ACN2441
Insecta	Diptera	Cecidomyiidae				BOLD:ACN2497
Insecta	Diptera	Cecidomyiidae				BOLD:ACN2794
Insecta	Diptera	Cecidomyiidae				BOLD:ACN2830
Insecta	Diptera	Cecidomyiidae				BOLD:ACN4544
Insecta	Diptera	Cecidomyiidae				BOLD:ACN6062
Insecta	Diptera	Cecidomyiidae				BOLD:ACN6063
Insecta	Diptera	Cecidomyiidae				BOLD:ACN6538
Insecta	Diptera	Cecidomyiidae				BOLD:ACO0652
Insecta	Diptera	Cecidomyiidae				BOLD:ACO0736
Insecta	Diptera	Cecidomyiidae				BOLD:ACO0853
Insecta	Diptera	Cecidomyiidae				BOLD:ACO0900
Insecta	Diptera	Cecidomyiidae				BOLD:ACO2318
Insecta	Diptera	Cecidomyiidae				BOLD:ACO2969
Insecta	Diptera	Cecidomyiidae				BOLD:ACO3576
Insecta	Diptera	Cecidomyiidae				BOLD:ACO4064
Insecta	Diptera	Cecidomyiidae				BOLD:ACO5485
Insecta	Diptera	Cecidomyiidae				BOLD:ACO5694
Insecta	Diptera	Cecidomyiidae				BOLD:ACO6873
Insecta	Diptera	Cecidomyiidae				BOLD:ACO6945
Insecta	Diptera	Cecidomyiidae				BOLD:ACO7032
Insecta	Diptera	Cecidomyiidae				BOLD:ACO7195
Insecta	Diptera	Cecidomyiidae				BOLD:ACO7760
Insecta	Diptera	Cecidomyiidae				BOLD:ACO7816
Insecta	Diptera	Cecidomyiidae				BOLD:ACO8473
Insecta	Diptera	Cecidomyiidae				BOLD:ACO8710
Insecta	Diptera	Cecidomyiidae				BOLD:ACO8845
Insecta	Diptera	Cecidomyiidae				BOLD:ACO9769
Insecta	Diptera	Cecidomyiidae				BOLD:ACP1439
Insecta	Diptera	Cecidomyiidae				BOLD:ACP2185
Insecta	Diptera	Cecidomyiidae				BOLD:ACP6365
Insecta	Diptera	Cecidomyiidae				BOLD:ACP6481
Insecta	Diptera	Cecidomyiidae				BOLD:ACP6842
Insecta	Diptera	Cecidomyiidae				BOLD:ACP7183
Insecta	Diptera	Cecidomyiidae				BOLD:ACQ4016
Insecta	Diptera	Cecidomyiidae				BOLD:ACR1182
Insecta	Diptera	Cecidomyiidae				BOLD:ACU7691
Insecta	Diptera	Cecidomyiidae				BOLD:ACU8738
Insecta	Diptera	Cecidomyiidae				BOLD:ACU9346
Insecta	Diptera	Cecidomyiidae				BOLD:ACU9418
Insecta	Diptera	Cecidomyiidae				BOLD:ACU9619
Insecta	Diptera	Cecidomyiidae				BOLD:ACU9739
Insecta	Diptera	Cecidomyiidae				BOLD:ACV0087
Insecta	Diptera	Cecidomyiidae				BOLD:ACV0855
Insecta	Diptera	Cecidomyiidae				BOLD:ACV1247
Insecta	Diptera	Cecidomyiidae				BOLD:ACV2123
Insecta	Diptera	Cecidomyiidae				BOLD:ACW2325
Insecta	Diptera	Cecidomyiidae				BOLD:ACW2801
Insecta	Diptera	Cecidomyiidae				BOLD:ACW6131
Insecta	Diptera	Cecidomyiidae				BOLD:ACX4118
Insecta	Diptera	Cecidomyiidae				BOLD:ACX5726
Insecta	Diptera	Cecidomyiidae				BOLD:ACY5304
Insecta	Diptera	Cecidomyiidae				BOLD:ACZ3063
Insecta	Diptera	Cecidomyiidae				BOLD:ACZ4544
Insecta	Diptera	Cecidomyiidae				BOLD:ACZ5643
Insecta	Diptera	Cecidomyiidae				BOLD:ACZ5839
Insecta	Diptera	Cecidomyiidae				BOLD:ACZ6432
Insecta	Diptera	Cecidomyiidae				BOLD:ADB7105
Insecta	Diptera	Cecidomyiidae				BOLD:ADB8413
Insecta	Diptera	Cecidomyiidae				BOLD:ADB8519
Insecta	Diptera	Cecidomyiidae				BOLD:ADB8593
Insecta	Diptera	Cecidomyiidae				BOLD:ADC0949
Insecta	Diptera	Cecidomyiidae				BOLD:ADC1558
Insecta	Diptera	Cecidomyiidae				BOLD:ADC1575
Insecta	Diptera	Cecidomyiidae				BOLD:ADC1778
Insecta	Diptera	Cecidomyiidae				BOLD:ADG9438
Insecta	Diptera	Cecidomyiidae				BOLD:ADH0753
Insecta	Diptera	Cecidomyiidae				BOLD:ADH9083
Insecta	Diptera	Cecidomyiidae				BOLD:ADK9578
Insecta	Diptera	Cecidomyiidae				BOLD:ADS3471
Insecta	Diptera	Cecidomyiidae				BOLD:ADS4115
Insecta	Diptera	Cecidomyiidae				BOLD:ADS4862
Insecta	Diptera	Cecidomyiidae				BOLD:ADS5290
Insecta	Diptera	Cecidomyiidae				BOLD:ADT3165
Insecta	Diptera	Cecidomyiidae				BOLD:ADT3711
Insecta	Diptera	Cecidomyiidae				BOLD:ADT4170
Insecta	Diptera	Cecidomyiidae				BOLD:ADT4473
Insecta	Diptera	Cecidomyiidae				BOLD:ADT5589
Insecta	Diptera	Cecidomyiidae				BOLD:ADT8389
Insecta	Diptera	Cecidomyiidae				BOLD:ADT8637
Insecta	Diptera	Cecidomyiidae				BOLD:ADU3562
Insecta	Diptera	Cecidomyiidae				BOLD:ADU5779
Insecta	Diptera	Cecidomyiidae				BOLD:ADU8373
Insecta	Diptera	Cecidomyiidae				BOLD:ADV1655
Insecta	Diptera	Cecidomyiidae				BOLD:ADV1832
Insecta	Diptera	Cecidomyiidae				BOLD:ADV3879
Insecta	Diptera	Cecidomyiidae				BOLD:ADV6097
Insecta	Diptera	Cecidomyiidae				BOLD:ADW9289
Insecta	Diptera	Cecidomyiidae				BOLD:ADX7269
Insecta	Diptera	Cecidomyiidae				BOLD:ADY3952
Insecta	Diptera	Cecidomyiidae				BOLD:ADY7081
Insecta	Diptera	Cecidomyiidae				BOLD:ADY7437
Insecta	Diptera	Cecidomyiidae				BOLD:AEA1602
Insecta	Diptera	Ceratopogonidae	Ceratopogoninae	Culicoides		BOLD:ACO0426
Insecta	Diptera	Ceratopogonidae	Forcipomyiinae	Forcipomyia		BOLD:ABV1249
Insecta	Diptera	Ceratopogonidae	Forcipomyiinae	Forcipomyia		BOLD:ACN8298
Insecta	Diptera	Ceratopogonidae	Forcipomyiinae	Forcipomyia		BOLD:ACO8431
Insecta	Diptera	Ceratopogonidae	Forcipomyiinae	Forcipomyia		BOLD:ACV4244
Insecta	Diptera	Ceratopogonidae				BOLD:ABX2163
Insecta	Diptera	Ceratopogonidae				BOLD:ABX9577
Insecta	Diptera	Ceratopogonidae				BOLD:ABY0215
Insecta	Diptera	Ceratopogonidae				BOLD:ABY0384
Insecta	Diptera	Ceratopogonidae				BOLD:ACD5681
Insecta	Diptera	Ceratopogonidae				BOLD:ACM7886
Insecta	Diptera	Ceratopogonidae				BOLD:ACN2048
Insecta	Diptera	Ceratopogonidae				BOLD:ACP2268
Insecta	Diptera	Ceratopogonidae				BOLD:ACP2441
Insecta	Diptera	Ceratopogonidae				BOLD:ACP4272
Insecta	Diptera	Ceratopogonidae				BOLD:ACP4280
Insecta	Diptera	Ceratopogonidae				BOLD:ACR1045
Insecta	Diptera	Ceratopogonidae				BOLD:ACU8246
Insecta	Diptera	Ceratopogonidae				BOLD:ACU8417
Insecta	Diptera	Ceratopogonidae				BOLD:ACU9802
Insecta	Diptera	Ceratopogonidae				BOLD:ACW1632
Insecta	Diptera	Ceratopogonidae				BOLD:ACW1784
Insecta	Diptera	Ceratopogonidae				BOLD:ACW2053
Insecta	Diptera	Ceratopogonidae				BOLD:ACX6101
Insecta	Diptera	Ceratopogonidae				BOLD:ADC1150
Insecta	Diptera	Ceratopogonidae				BOLD:ADC1190
Insecta	Diptera	Ceratopogonidae				BOLD:ADC1235
Insecta	Diptera	Ceratopogonidae				BOLD:ADC2004
Insecta	Diptera	Ceratopogonidae				BOLD:ADC2007
Insecta	Diptera	Ceratopogonidae				BOLD:ADC2252
Insecta	Diptera	Ceratopogonidae				BOLD:ADC2253
Insecta	Diptera	Ceratopogonidae				BOLD:ADE3037
Insecta	Diptera	Ceratopogonidae				BOLD:ADG9697
Insecta	Diptera	Ceratopogonidae				BOLD:ADH4425
Insecta	Diptera	Ceratopogonidae				BOLD:ADJ2649
Insecta	Diptera	Ceratopogonidae				BOLD:ADM3839
Insecta	Diptera	Ceratopogonidae				BOLD:ADM6070
Insecta	Diptera	Ceratopogonidae				BOLD:ADP2937
Insecta	Diptera	Ceratopogonidae				BOLD:ADS2297
Insecta	Diptera	Ceratopogonidae				BOLD:ADS5750
Insecta	Diptera	Ceratopogonidae				BOLD:ADT0884
Insecta	Diptera	Ceratopogonidae				BOLD:ADT2028
Insecta	Diptera	Ceratopogonidae				BOLD:ADT9461
Insecta	Diptera	Ceratopogonidae				BOLD:ADU4173
Insecta	Diptera	Ceratopogonidae				BOLD:ADX3727
Insecta	Diptera	Chamaemyiidae	Chamaemyiinae	Leucopis		BOLD:ABX2824
Insecta	Diptera	Chironomidae	Chironominae	Chironomus		BOLD:ADV3212
Insecta	Diptera	Chironomidae	Chironominae	Cryptochironomus		BOLD:ADT3414
Insecta	Diptera	Chironomidae	Chironominae	Einfeldia		BOLD:ACD8351
Insecta	Diptera	Chironomidae	Chironominae	Endochironomus, Benthalia		BOLD:ADK4905
Insecta	Diptera	Chironomidae	Chironominae			BOLD:ADY8264
Insecta	Diptera	Chironomidae	Orthocladiinae	Cricotopus		BOLD:ADT2084
Insecta	Diptera	Chironomidae	Orthocladiinae	Cricotopus		BOLD:ADT2085
Insecta	Diptera	Chironomidae	Orthocladiinae	Limnophyes		BOLD:ADL1545
Insecta	Diptera	Chironomidae	Orthocladiinae	Pseudosmittia		BOLD:ACR3546
Insecta	Diptera	Chironomidae	Orthocladiinae			BOLD:ACN2681
Insecta	Diptera	Chironomidae	Orthocladiinae			BOLD:ADT5513
Insecta	Diptera	Chironomidae	Orthocladiinae			BOLD:ADX1484
Insecta	Diptera	Chironomidae	Tanypodinae	Ablabesmyia		BOLD:ADY6351
Insecta	Diptera	Chironomidae	Tanypodinae	Monopelopia		BOLD:ADP2689
Insecta	Diptera	Chironomidae				BOLD:ACN3192
Insecta	Diptera	Chironomidae				BOLD:ACO9003
Insecta	Diptera	Chironomidae				BOLD:ACO9312
Insecta	Diptera	Chironomidae				BOLD:ACU8291
Insecta	Diptera	Chironomidae				BOLD:ACV0083
Insecta	Diptera	Chironomidae				BOLD:ADU5416
Insecta	Diptera	Chironomidae				BOLD:ADU6857
Insecta	Diptera	Chironomidae				BOLD:ADU6858
Insecta	Diptera	Chironomidae				BOLD:AEB7781
Insecta	Diptera	Chironomidae				BOLD:AEB8771
Insecta	Diptera	Chironomidae				BOLD:AEB9891
Insecta	Diptera	Chironomidae				BOLD:AEC0657
Insecta	Diptera	Chironomidae				BOLD:AEC2537
Insecta	Diptera	Chloropidae	Oscinellinae	Dasyopa		BOLD:ACO7180
Insecta	Diptera	Chloropidae	Oscinellinae			BOLD:AAG1505
Insecta	Diptera	Chloropidae	Oscinellinae			BOLD:AAG1511
Insecta	Diptera	Chloropidae	Oscinellinae			BOLD:ABZ6740
Insecta	Diptera	Chloropidae	Oscinellinae			BOLD:ACO9394
Insecta	Diptera	Chloropidae	Oscinellinae			BOLD:ACR3351
Insecta	Diptera	Chloropidae	Oscinellinae			BOLD:ACW4977
Insecta	Diptera	Chloropidae				BOLD:ABW5566
Insecta	Diptera	Chloropidae				BOLD:ABW7988
Insecta	Diptera	Chloropidae				BOLD:ACA3149
Insecta	Diptera	Chloropidae				BOLD:ACD7653
Insecta	Diptera	Chloropidae				BOLD:ACG0916
Insecta	Diptera	Chloropidae				BOLD:ACG2168
Insecta	Diptera	Chloropidae				BOLD:ACH0245
Insecta	Diptera	Chloropidae				BOLD:ACN5293
Insecta	Diptera	Chloropidae				BOLD:ACQ7667
Insecta	Diptera	Chloropidae				BOLD:ACQ9153
Insecta	Diptera	Chloropidae				BOLD:ACR0498
Insecta	Diptera	Chloropidae				BOLD:ACT7657
Insecta	Diptera	Chloropidae				BOLD:ACU9192
Insecta	Diptera	Chloropidae				BOLD:ACU9878
Insecta	Diptera	Chloropidae				BOLD:ACV0895
Insecta	Diptera	Chloropidae				BOLD:ACV2690
Insecta	Diptera	Chloropidae				BOLD:ACV5393
Insecta	Diptera	Chloropidae				BOLD:ACV5628
Insecta	Diptera	Chloropidae				BOLD:ACW4978
Insecta	Diptera	Chloropidae				BOLD:ACW8049
Insecta	Diptera	Chloropidae				BOLD:ACW9236
Insecta	Diptera	Chloropidae				BOLD:ACW9734
Insecta	Diptera	Chloropidae				BOLD:ACX4837
Insecta	Diptera	Chloropidae				BOLD:ADE9270
Insecta	Diptera	Chloropidae				BOLD:ADH8250
Insecta	Diptera	Chloropidae				BOLD:ADH9835
Insecta	Diptera	Chloropidae				BOLD:ADM5287
Insecta	Diptera	Chloropidae				BOLD:ADM8630
Insecta	Diptera	Chloropidae				BOLD:ADT8826
Insecta	Diptera	Chloropidae				BOLD:ADU7477
Insecta	Diptera	Chloropidae				BOLD:ADV4100
Insecta	Diptera	Chloropidae				BOLD:ADV4999
Insecta	Diptera	Chloropidae				BOLD:ADW7268
Insecta	Diptera	Chyromyidae				BOLD:ACV2194
Insecta	Diptera	Culicidae, Tipulidae, Limoniidae	Limoniinae, Anophelinae	Limonia, Anopheles		BOLD:AAN4419
Insecta	Diptera	Dolichopodidae	Diaphorinae	Chrysotus		BOLD:ACM7903
Insecta	Diptera	Dolichopodidae	Diaphorinae	Chrysotus		BOLD:ADS4557
Insecta	Diptera	Dolichopodidae	Diaphorinae	Chrysotus		BOLD:ADS5312
Insecta	Diptera	Dolichopodidae				BOLD:ABW7864
Insecta	Diptera	Dolichopodidae				BOLD:ABY0087
Insecta	Diptera	Dolichopodidae				BOLD:ABY0771
Insecta	Diptera	Dolichopodidae				BOLD:ACF9164
Insecta	Diptera	Dolichopodidae				BOLD:ACI9258
Insecta	Diptera	Dolichopodidae				BOLD:ACO0909
Insecta	Diptera	Dolichopodidae				BOLD:ACO1066
Insecta	Diptera	Dolichopodidae				BOLD:ACO5036
Insecta	Diptera	Dolichopodidae				BOLD:ACP4486
Insecta	Diptera	Dolichopodidae				BOLD:ACU8525
Insecta	Diptera	Dolichopodidae				BOLD:ACU9238
Insecta	Diptera	Dolichopodidae				BOLD:ACW2138
Insecta	Diptera	Dolichopodidae				BOLD:ADC2115
Insecta	Diptera	Dolichopodidae				BOLD:ADE1291
Insecta	Diptera	Dolichopodidae				BOLD:ADH3107
Insecta	Diptera	Dolichopodidae				BOLD:ADV4320
Insecta	Diptera	Drosophilidae	Drosophilinae	Drosophila		BOLD:ADS9072
Insecta	Diptera	Drosophilidae	Drosophilinae	Scaptomyza		BOLD:ACL1049
Insecta	Diptera	Drosophilidae	Drosophilinae	Zaprionus		BOLD:ACV1527
Insecta	Diptera	Drosophilidae	Steganinae	Leucophenga		BOLD:ABW5555
Insecta	Diptera	Drosophilidae	Steganinae	Leucophenga		BOLD:ADO1932
Insecta	Diptera	Drosophilidae	Steganinae	Leucophenga		BOLD:ADU5159
Insecta	Diptera	Drosophilidae				BOLD:ABW5570
Insecta	Diptera	Drosophilidae				BOLD:ABW8534
Insecta	Diptera	Drosophilidae				BOLD:ACD7865
Insecta	Diptera	Drosophilidae				BOLD:ACG0240
Insecta	Diptera	Drosophilidae				BOLD:ACO0928
Insecta	Diptera	Drosophilidae				BOLD:ACO3528
Insecta	Diptera	Drosophilidae				BOLD:ACO8718
Insecta	Diptera	Drosophilidae				BOLD:ACP4034
Insecta	Diptera	Drosophilidae				BOLD:ACV3378
Insecta	Diptera	Drosophilidae				BOLD:ADF5605
Insecta	Diptera	Drosophilidae				BOLD:ADG1071
Insecta	Diptera	Drosophilidae				BOLD:ADU3161
Insecta	Diptera	Ephydridae	Discomyzinae	Psilopa		BOLD:ABW5531
Insecta	Diptera	Ephydridae	Ephydrinae	Scatella		BOLD:ABW7890
Insecta	Diptera	Ephydridae	Ephydrinae	Scatella		BOLD:ADV4026
Insecta	Diptera	Ephydridae	Hydrelliinae			BOLD:ADH9066
Insecta	Diptera	Ephydridae	Ilytheinae	Nostima		BOLD:ACA2879
Insecta	Diptera	Ephydridae	Ilytheinae	Nostima		BOLD:ADS2764
Insecta	Diptera	Ephydridae	Ilytheinae	Nostima		BOLD:ADU7738
Insecta	Diptera	Ephydridae				BOLD:ABY0698
Insecta	Diptera	Ephydridae				BOLD:ABY1193
Insecta	Diptera	Ephydridae				BOLD:ACD5635
Insecta	Diptera	Ephydridae				BOLD:ACM7787
Insecta	Diptera	Ephydridae				BOLD:ACO7229
Insecta	Diptera	Ephydridae				BOLD:ACO8271
Insecta	Diptera	Ephydridae				BOLD:ACO9119
Insecta	Diptera	Ephydridae				BOLD:ACP4382
Insecta	Diptera	Ephydridae				BOLD:ACU9704
Insecta	Diptera	Ephydridae				BOLD:ACV5169
Insecta	Diptera	Ephydridae				BOLD:ACW2707
Insecta	Diptera	Ephydridae				BOLD:ADU0935
Insecta	Diptera	Ephydridae				BOLD:ADY2289
Insecta	Diptera	Fanniidae				BOLD:ACP3490
Insecta	Diptera	Fanniidae				BOLD:ACZ6419
Insecta	Diptera	Hybotidae	Tachydromiinae			BOLD:ACQ1912
Insecta	Diptera	Hybotidae				BOLD:ACO3219
Insecta	Diptera	Hybotidae				BOLD:ACW2596
Insecta	Diptera	Keroplatidae				BOLD:ABY1196
Insecta	Diptera	Keroplatidae				BOLD:ACW2710
Insecta	Diptera	Keroplatidae				BOLD:ADU1251
Insecta	Diptera	Lauxaniidae				BOLD:ADV7258
Insecta	Diptera	Limoniidae	Limoniinae	Dicranomyia		BOLD:ACO3824
Insecta	Diptera	Limoniidae	Limoniinae	Libnotes, Limonia		BOLD:AAN4393
Insecta	Diptera	Limoniidae	Limoniinae	Limonia		BOLD:AAN4411
Insecta	Diptera	Limoniidae	Limoniinae	Limonia		BOLD:AAN4421
Insecta	Diptera	Limoniidae				BOLD:ADC1393
Insecta	Diptera	Lonchaeidae				BOLD:ACO7753
Insecta	Diptera	Lonchaeidae				BOLD:ACP3069
Insecta	Diptera	Lonchaeidae				BOLD:ACV4775
Insecta	Diptera	Lonchaeidae				BOLD:ACW1395
Insecta	Diptera	Lonchaeidae				BOLD:ACW5731
Insecta	Diptera	Lonchaeidae				BOLD:ADS1404
Insecta	Diptera	Lonchaeidae				BOLD:ADV2365
Insecta	Diptera	Milichiidae	Madizinae	Desmometopa		BOLD:ADU4737
Insecta	Diptera	Milichiidae	Milichiinae	Milichiella		BOLD:ACV7647
Insecta	Diptera	Milichiidae	Milichiinae	Milichiella		BOLD:ACX5806
Insecta	Diptera	Milichiidae				BOLD:ADM7834
Insecta	Diptera	Muscidae	Atherigoninae	Atherigona		BOLD:AAG1696
Insecta	Diptera	Muscidae	Atherigoninae	Atherigona		BOLD:AAG1745
Insecta	Diptera	Muscidae	Atherigoninae	Atherigona		BOLD:AAO8257
Insecta	Diptera	Muscidae	Atherigoninae	Atherigona		BOLD:ACJ5809
Insecta	Diptera	Muscidae	Atherigoninae	Atherigona		BOLD:ACP5356
Insecta	Diptera	Muscidae	Atherigoninae	Atherigona		BOLD:ADH0509
Insecta	Diptera	Muscidae	Atherigoninae	Atherigona		BOLD:ADN9303
Insecta	Diptera	Muscidae	Atherigoninae	Atherigona		BOLD:ADS1269
Insecta	Diptera	Muscidae	Atherigoninae	Atherigona		BOLD:ADS4059
Insecta	Diptera	Muscidae	Atherigoninae	Atherigona		BOLD:ADU1643
Insecta	Diptera	Muscidae	Atherigoninae	Atherigona		BOLD:ADY4313
Insecta	Diptera	Muscidae	Coenosiinae	Coenosia		BOLD:ABV1242
Insecta	Diptera	Muscidae	Coenosiinae	Coenosia		BOLD:ABW5576
Insecta	Diptera	Muscidae	Coenosiinae	Coenosia		BOLD:ACA6779
Insecta	Diptera	Muscidae	Coenosiinae	Coenosia		BOLD:ACD6075
Insecta	Diptera	Muscidae	Coenosiinae	Coenosia		BOLD:ADV0280
Insecta	Diptera	Muscidae	Coenosiinae	Coenosia		BOLD:ADV2812
Insecta	Diptera	Muscidae	Coenosiinae	Limnophora		BOLD:ACO3894
Insecta	Diptera	Muscidae	Coenosiinae	Lispe		BOLD:ACA4045
Insecta	Diptera	Muscidae	Coenosiinae	Lispe		BOLD:ADQ8521
Insecta	Diptera	Muscidae	Coenosiinae	Lispe		BOLD:ADS2915
Insecta	Diptera	Muscidae	Coenosiinae	Lispe		BOLD:ADS8437
Insecta	Diptera	Muscidae	Coenosiinae	Lispe		BOLD:ADY6033
Insecta	Diptera	Muscidae	Coenosiinae			BOLD:ACD5297
Insecta	Diptera	Muscidae	Muscinae	Morellia		BOLD:ABX9964
Insecta	Diptera	Muscidae	Mydaeinae	Hebecnema		BOLD:ABW6115
Insecta	Diptera	Muscidae	Phaoniinae	Phaonia		BOLD:ABW5537
Insecta	Diptera	Muscidae				BOLD:ABW5577
Insecta	Diptera	Muscidae				BOLD:ABX9967
Insecta	Diptera	Muscidae				BOLD:ACB1873
Insecta	Diptera	Muscidae				BOLD:ACK2111
Insecta	Diptera	Muscidae				BOLD:ACK2305
Insecta	Diptera	Muscidae				BOLD:ACL1544
Insecta	Diptera	Muscidae				BOLD:ACN5201
Insecta	Diptera	Muscidae				BOLD:ACO8313
Insecta	Diptera	Muscidae				BOLD:ACV0220
Insecta	Diptera	Muscidae				BOLD:ACV1174
Insecta	Diptera	Muscidae				BOLD:ACV1178
Insecta	Diptera	Muscidae				BOLD:ACV1193
Insecta	Diptera	Muscidae				BOLD:ACV8099
Insecta	Diptera	Muscidae				BOLD:ACW5568
Insecta	Diptera	Muscidae				BOLD:ACX8381
Insecta	Diptera	Muscidae				BOLD:ACY5017
Insecta	Diptera	Muscidae				BOLD:ACY5917
Insecta	Diptera	Muscidae				BOLD:ACY6381
Insecta	Diptera	Muscidae				BOLD:ADE6801
Insecta	Diptera	Muscidae				BOLD:ADH6860
Insecta	Diptera	Muscidae				BOLD:ADP4201
Insecta	Diptera	Muscidae				BOLD:ADY4342
Insecta	Diptera	Mycetophilidae	Leiinae	Leia		BOLD:ABX2143
Insecta	Diptera	Mycetophilidae	Mycetophilinae	Sceptonia		BOLD:ADF7673
Insecta	Diptera	Mycetophilidae	Mycomyinae	Neoempheria		BOLD:AAG4911
Insecta	Diptera	Mycetophilidae	Sciophilinae	Sciophila		BOLD:ACT5382
Insecta	Diptera	Mycetophilidae				BOLD:ACC5120
Insecta	Diptera	Mycetophilidae				BOLD:ACO0862
Insecta	Diptera	Mycetophilidae				BOLD:ADB8007
Insecta	Diptera	Mycetophilidae				BOLD:ADC2383
Insecta	Diptera	Mycetophilidae				BOLD:ADE8646
Insecta	Diptera	Mycetophilidae				BOLD:ADH4605
Insecta	Diptera	Mycetophilidae				BOLD:ADT6496
Insecta	Diptera	Periscelididae				BOLD:ACN4222
Insecta	Diptera	Phoridae	Chonocephalinae	Chonocephalus		BOLD:ACF6739
Insecta	Diptera	Phoridae	Metopininae	Megaselia		BOLD:ACB0802
Insecta	Diptera	Phoridae	Metopininae	Megaselia		BOLD:ACC1347
Insecta	Diptera	Phoridae	Metopininae	Megaselia		BOLD:ACC5871
Insecta	Diptera	Phoridae	Metopininae	Megaselia		BOLD:ACM0240
Insecta	Diptera	Phoridae	Metopininae	Megaselia		BOLD:ACO2285
Insecta	Diptera	Phoridae	Metopininae			BOLD:ACQ8442
Insecta	Diptera	Phoridae	Phorinae	Diplonevra		BOLD:ACO7379
Insecta	Diptera	Phoridae	Phorinae, Metopininae	Megaselia, Diplonevra		BOLD:ACA3150
Insecta	Diptera	Phoridae				BOLD:AAO8578
Insecta	Diptera	Phoridae				BOLD:ABW5512
Insecta	Diptera	Phoridae				BOLD:ABW5522
Insecta	Diptera	Phoridae				BOLD:ABW5557
Insecta	Diptera	Phoridae				BOLD:ABW5562
Insecta	Diptera	Phoridae				BOLD:ABW7948
Insecta	Diptera	Phoridae				BOLD:ABW7950
Insecta	Diptera	Phoridae				BOLD:ABW7963
Insecta	Diptera	Phoridae				BOLD:ABW7976
Insecta	Diptera	Phoridae				BOLD:ABW7990
Insecta	Diptera	Phoridae				BOLD:ABW7994
Insecta	Diptera	Phoridae				BOLD:ABX3324
Insecta	Diptera	Phoridae				BOLD:ABX6652
Insecta	Diptera	Phoridae				BOLD:ABX9574
Insecta	Diptera	Phoridae				BOLD:ACA3147
Insecta	Diptera	Phoridae				BOLD:ACB5771
Insecta	Diptera	Phoridae				BOLD:ACF6985
Insecta	Diptera	Phoridae				BOLD:ACF8807
Insecta	Diptera	Phoridae				BOLD:ACG1044
Insecta	Diptera	Phoridae				BOLD:ACM7658
Insecta	Diptera	Phoridae				BOLD:ACM8029
Insecta	Diptera	Phoridae				BOLD:ACN1670
Insecta	Diptera	Phoridae				BOLD:ACN2491
Insecta	Diptera	Phoridae				BOLD:ACN2583
Insecta	Diptera	Phoridae				BOLD:ACO0933
Insecta	Diptera	Phoridae				BOLD:ACO1062
Insecta	Diptera	Phoridae				BOLD:ACO3474
Insecta	Diptera	Phoridae				BOLD:ACO4627
Insecta	Diptera	Phoridae				BOLD:ACO4775
Insecta	Diptera	Phoridae				BOLD:ACO7076
Insecta	Diptera	Phoridae				BOLD:ACO7364
Insecta	Diptera	Phoridae				BOLD:ACO7552
Insecta	Diptera	Phoridae				BOLD:ACO8245
Insecta	Diptera	Phoridae				BOLD:ACO8329
Insecta	Diptera	Phoridae				BOLD:ACO8838
Insecta	Diptera	Phoridae				BOLD:ACO9022
Insecta	Diptera	Phoridae				BOLD:ACO9761
Insecta	Diptera	Phoridae				BOLD:ACO9799
Insecta	Diptera	Phoridae				BOLD:ACO9978
Insecta	Diptera	Phoridae				BOLD:ACP2597
Insecta	Diptera	Phoridae				BOLD:ACP3822
Insecta	Diptera	Phoridae				BOLD:ACP3949
Insecta	Diptera	Phoridae				BOLD:ACP4922
Insecta	Diptera	Phoridae				BOLD:ACP4980
Insecta	Diptera	Phoridae				BOLD:ACP9633
Insecta	Diptera	Phoridae				BOLD:ACQ7223
Insecta	Diptera	Phoridae				BOLD:ACQ9639
Insecta	Diptera	Phoridae				BOLD:ACQ9810
Insecta	Diptera	Phoridae				BOLD:ACR1196
Insecta	Diptera	Phoridae				BOLD:ACR1917
Insecta	Diptera	Phoridae				BOLD:ACR2597
Insecta	Diptera	Phoridae				BOLD:ACR2774
Insecta	Diptera	Phoridae				BOLD:ACR3517
Insecta	Diptera	Phoridae				BOLD:ACR3556
Insecta	Diptera	Phoridae				BOLD:ACS3082
Insecta	Diptera	Phoridae				BOLD:ACU8003
Insecta	Diptera	Phoridae				BOLD:ACU8491
Insecta	Diptera	Phoridae				BOLD:ACU8522
Insecta	Diptera	Phoridae				BOLD:ACU8751
Insecta	Diptera	Phoridae				BOLD:ACV0221
Insecta	Diptera	Phoridae				BOLD:ACV0403
Insecta	Diptera	Phoridae				BOLD:ACV3265
Insecta	Diptera	Phoridae				BOLD:ACW2012
Insecta	Diptera	Phoridae				BOLD:ACW2520
Insecta	Diptera	Phoridae				BOLD:ACW2704
Insecta	Diptera	Phoridae				BOLD:ACW5649
Insecta	Diptera	Phoridae				BOLD:ACX7112
Insecta	Diptera	Phoridae				BOLD:ACX7198
Insecta	Diptera	Phoridae				BOLD:ACY1777
Insecta	Diptera	Phoridae				BOLD:ACY1934
Insecta	Diptera	Phoridae				BOLD:ACY2836
Insecta	Diptera	Phoridae				BOLD:ACY2849
Insecta	Diptera	Phoridae				BOLD:ACY5231
Insecta	Diptera	Phoridae				BOLD:ACY5467
Insecta	Diptera	Phoridae				BOLD:ACZ4929
Insecta	Diptera	Phoridae				BOLD:ACZ5675
Insecta	Diptera	Phoridae				BOLD:ADB5385
Insecta	Diptera	Phoridae				BOLD:ADB5418
Insecta	Diptera	Phoridae				BOLD:ADB6288
Insecta	Diptera	Phoridae				BOLD:ADB7761
Insecta	Diptera	Phoridae				BOLD:ADB8517
Insecta	Diptera	Phoridae				BOLD:ADD7915
Insecta	Diptera	Phoridae				BOLD:ADE0374
Insecta	Diptera	Phoridae				BOLD:ADE2910
Insecta	Diptera	Phoridae				BOLD:ADE4509
Insecta	Diptera	Phoridae				BOLD:ADE5513
Insecta	Diptera	Phoridae				BOLD:ADE5515
Insecta	Diptera	Phoridae				BOLD:ADE7279
Insecta	Diptera	Phoridae				BOLD:ADF8977
Insecta	Diptera	Phoridae				BOLD:ADH8688
Insecta	Diptera	Phoridae				BOLD:ADJ1474
Insecta	Diptera	Phoridae				BOLD:ADM4346
Insecta	Diptera	Phoridae				BOLD:ADM9630
Insecta	Diptera	Phoridae				BOLD:ADN5194
Insecta	Diptera	Phoridae				BOLD:ADO3003
Insecta	Diptera	Phoridae				BOLD:ADP2870
Insecta	Diptera	Phoridae				BOLD:ADQ0130
Insecta	Diptera	Phoridae				BOLD:ADQ3343
Insecta	Diptera	Phoridae				BOLD:ADS5414
Insecta	Diptera	Phoridae				BOLD:ADS5699
Insecta	Diptera	Phoridae				BOLD:ADS7311
Insecta	Diptera	Phoridae				BOLD:ADS8905
Insecta	Diptera	Phoridae				BOLD:ADT6871
Insecta	Diptera	Phoridae				BOLD:ADT7956
Insecta	Diptera	Phoridae				BOLD:ADU3008
Insecta	Diptera	Phoridae				BOLD:ADU5266
Insecta	Diptera	Phoridae				BOLD:ADU7962
Insecta	Diptera	Phoridae				BOLD:ADU9014
Insecta	Diptera	Phoridae				BOLD:ADV0859
Insecta	Diptera	Phoridae				BOLD:ADV4980
Insecta	Diptera	Phoridae				BOLD:ADV5338
Insecta	Diptera	Phoridae				BOLD:ADV6048
Insecta	Diptera	Phoridae				BOLD:ADW9310
Insecta	Diptera	Phoridae				BOLD:ADX2223
Insecta	Diptera	Phoridae				BOLD:ADZ8078
Insecta	Diptera	Platystomatidae				BOLD:ACV1591
Insecta	Diptera	Platystomatidae				BOLD:ADV6573
Insecta	Diptera	Psilidae				BOLD:AAF9705
Insecta	Diptera	Psilidae				BOLD:ACW1663
Insecta	Diptera	Psilidae				BOLD:ADE2906
Insecta	Diptera	Psychodidae	Psychodinae	Brunettia		BOLD:AAU4651
Insecta	Diptera	Psychodidae	Psychodinae	Brunettia		BOLD:ADS2146
Insecta	Diptera	Psychodidae	Psychodinae	Psychoda, Telmatoscopus, Clogmia		BOLD:AAF9305
Insecta	Diptera	Psychodidae	Psychodinae			BOLD:ACO0584
Insecta	Diptera	Psychodidae				BOLD:AAP4715
Insecta	Diptera	Psychodidae				BOLD:ABW5553
Insecta	Diptera	Psychodidae				BOLD:ABW7944
Insecta	Diptera	Psychodidae				BOLD:ACK1425
Insecta	Diptera	Psychodidae				BOLD:ACM4821
Insecta	Diptera	Psychodidae				BOLD:ACN0369
Insecta	Diptera	Psychodidae				BOLD:ACO0857
Insecta	Diptera	Psychodidae				BOLD:ACO7685
Insecta	Diptera	Psychodidae				BOLD:ACO8336
Insecta	Diptera	Psychodidae				BOLD:ACO8501
Insecta	Diptera	Psychodidae				BOLD:ACP1440
Insecta	Diptera	Psychodidae				BOLD:ACP4523
Insecta	Diptera	Psychodidae				BOLD:ACP6860
Insecta	Diptera	Psychodidae				BOLD:ACQ0419
Insecta	Diptera	Psychodidae				BOLD:ACU7800
Insecta	Diptera	Psychodidae				BOLD:ACU7959
Insecta	Diptera	Psychodidae				BOLD:ACV0501
Insecta	Diptera	Psychodidae				BOLD:ACW3498
Insecta	Diptera	Psychodidae				BOLD:ACZ6450
Insecta	Diptera	Psychodidae				BOLD:ADB8725
Insecta	Diptera	Psychodidae				BOLD:ADP4787
Insecta	Diptera	Psychodidae				BOLD:ADP5065
Insecta	Diptera	Psychodidae				BOLD:ADS7106
Insecta	Diptera	Psychodidae				BOLD:ADT5617
Insecta	Diptera	Sarcophagidae	Sarcophaginae	Sarcophaga		BOLD:ADT3984
Insecta	Diptera	Sarcophagidae	Sarcophaginae			BOLD:ACO9321
Insecta	Diptera	Sarcophagidae	Sarcophaginae			BOLD:ADS2424
Insecta	Diptera	Sarcophagidae				BOLD:ACN1766
Insecta	Diptera	Sarcophagidae				BOLD:ACN5450
Insecta	Diptera	Sarcophagidae				BOLD:ADS5429
Insecta	Diptera	Sarcophagidae				BOLD:ADT5693
Insecta	Diptera	Scatopsidae	Scatopsinae	Colobostema, Holoplagia		BOLD:AAG8389
Insecta	Diptera	Scatopsidae				BOLD:ACM8057
Insecta	Diptera	Scatopsidae				BOLD:ADT3836
Insecta	Diptera	Scatopsidae				BOLD:ADU2534
Insecta	Diptera	Sciaridae		Bradysia		BOLD:ACM9918
Insecta	Diptera	Sciaridae		Bradysia		BOLD:ACO0760
Insecta	Diptera	Sciaridae		Bradysia		BOLD:ACU7568
Insecta	Diptera	Sciaridae		Bradysia		BOLD:ADD0911
Insecta	Diptera	Sciaridae		Bradysia		BOLD:ADD2715
Insecta	Diptera	Sciaridae		Bradysia		BOLD:ADD3057
Insecta	Diptera	Sciaridae		Bradysia		BOLD:ADD3351
Insecta	Diptera	Sciaridae		Bradysia		BOLD:ADJ8265
Insecta	Diptera	Sciaridae		Bradysia		BOLD:ADT1755
Insecta	Diptera	Sciaridae		Bradysia		BOLD:ADT4659
Insecta	Diptera	Sciaridae		Bradysia, Chaetosciara		BOLD:ACO3188
Insecta	Diptera	Sciaridae		Bradysia, Pseudolycoriella		BOLD:ACO9793
Insecta	Diptera	Sciaridae		Bradysia, Pseudolycoriella		BOLD:ADK7486
Insecta	Diptera	Sciaridae		Cosmosciara		BOLD:ACG9863
Insecta	Diptera	Sciaridae		Dolichosciara		BOLD:ADJ9055
Insecta	Diptera	Sciaridae		Dolichosciara		BOLD:ADJ9663
Insecta	Diptera	Sciaridae		Hyperlasion		BOLD:ADC2208
Insecta	Diptera	Sciaridae		Prosciara		BOLD:ADK4635
Insecta	Diptera	Sciaridae		Pseudolycoriella		BOLD:ADD2556
Insecta	Diptera	Sciaridae		Sciara		BOLD:ADJ8008
Insecta	Diptera	Sciaridae				BOLD:ABW2719
Insecta	Diptera	Sciaridae				BOLD:ABX0268
Insecta	Diptera	Sciaridae				BOLD:ABX2119
Insecta	Diptera	Sciaridae				BOLD:ACD5296
Insecta	Diptera	Sciaridae				BOLD:ACD5710
Insecta	Diptera	Sciaridae				BOLD:ACN2867
Insecta	Diptera	Sciaridae				BOLD:ACO0940
Insecta	Diptera	Sciaridae				BOLD:ACO3759
Insecta	Diptera	Sciaridae				BOLD:ACO8180
Insecta	Diptera	Sciaridae				BOLD:ACO9545
Insecta	Diptera	Sciaridae				BOLD:ACP1124
Insecta	Diptera	Sciaridae				BOLD:ACU8016
Insecta	Diptera	Sciaridae				BOLD:ACU9636
Insecta	Diptera	Sciaridae				BOLD:ACU9880
Insecta	Diptera	Sciaridae				BOLD:ADS8205
Insecta	Diptera	Sciaridae				BOLD:ADT2040
Insecta	Diptera	Sciaridae				BOLD:ADT6725
Insecta	Diptera	Sciaridae				BOLD:ADT8241
Insecta	Diptera	Sciaridae				BOLD:AEB7157
Insecta	Diptera	Sciaridae				BOLD:AEC0943
Insecta	Diptera	Sciaridae				BOLD:AEC1206
Insecta	Diptera	Sepsidae				BOLD:AAZ4286
Insecta	Diptera	Sepsidae				BOLD:ACS2331
Insecta	Diptera	Sepsidae				BOLD:ACW9789
Insecta	Diptera	Sphaeroceridae	Limosininae	Coproica		BOLD:ABW7888
Insecta	Diptera	Sphaeroceridae	Limosininae	Rachispoda		BOLD:ABX2157
Insecta	Diptera	Sphaeroceridae	Limosininae			BOLD:ADT9788
Insecta	Diptera	Sphaeroceridae				BOLD:AAP4724
Insecta	Diptera	Sphaeroceridae				BOLD:ACN6747
Insecta	Diptera	Sphaeroceridae				BOLD:ACO1089
Insecta	Diptera	Sphaeroceridae				BOLD:ACO7116
Insecta	Diptera	Sphaeroceridae				BOLD:ACO7289
Insecta	Diptera	Sphaeroceridae				BOLD:ACO7679
Insecta	Diptera	Sphaeroceridae				BOLD:ACO8600
Insecta	Diptera	Sphaeroceridae				BOLD:ACU7623
Insecta	Diptera	Sphaeroceridae				BOLD:ACV0415
Insecta	Diptera	Sphaeroceridae				BOLD:ACV1006
Insecta	Diptera	Sphaeroceridae				BOLD:ACV4523
Insecta	Diptera	Sphaeroceridae				BOLD:ADG0165
Insecta	Diptera	Sphaeroceridae				BOLD:ADZ6597
Insecta	Diptera	Stratiomyidae				BOLD:AAU6669
Insecta	Diptera	Stratiomyidae				BOLD:ACP1364
Insecta	Diptera	Stratiomyidae				BOLD:ACV1346
Insecta	Diptera	Stratiomyidae				BOLD:ACZ6023
Insecta	Diptera	Stratiomyidae				BOLD:ADI0172
Insecta	Diptera	Stratiomyidae				BOLD:ADU3312
Insecta	Diptera	Syrphidae	Eristalinae	Eristalinus		BOLD:ADD4230
Insecta	Diptera	Syrphidae	Eristalinae	Eumerus		BOLD:ADD4786
Insecta	Diptera	Syrphidae	Eristalinae	Eumerus		BOLD:ADD9580
Insecta	Diptera	Syrphidae	Eristalinae	Syritta		BOLD:ADD9743
Insecta	Diptera	Tachinidae	Exoristinae	Aplomya		BOLD:ADZ0250
Insecta	Diptera	Tachinidae	Exoristinae	Drino		BOLD:ADA0001
Insecta	Diptera	Tachinidae	Exoristinae	Drino		BOLD:ADY4548
Insecta	Diptera	Tachinidae	Exoristinae	Lespesia		BOLD:AAG2255
Insecta	Diptera	Tachinidae	Exoristinae	Phorocera		BOLD:ACM9568
Insecta	Diptera	Tachinidae	Tachininae	Peleteria		BOLD:ABX7120
Insecta	Diptera	Tachinidae	Tachininae	Peleteria		BOLD:ADU7776
Insecta	Diptera	Tachinidae	Tachininae			BOLD:ACO3299
Insecta	Diptera	Tachinidae				BOLD:AAG2298
Insecta	Diptera	Tachinidae				BOLD:AAG6798
Insecta	Diptera	Tachinidae				BOLD:ABW6114
Insecta	Diptera	Tachinidae				BOLD:ACD2191
Insecta	Diptera	Tachinidae				BOLD:ACD6069
Insecta	Diptera	Tachinidae				BOLD:ACD6152
Insecta	Diptera	Tachinidae				BOLD:ACO3014
Insecta	Diptera	Tachinidae				BOLD:ACO5497
Insecta	Diptera	Tachinidae				BOLD:ACV3262
Insecta	Diptera	Tachinidae				BOLD:ACW1913
Insecta	Diptera	Tachinidae				BOLD:ACX4750
Insecta	Diptera	Tachinidae				BOLD:ACY1933
Insecta	Diptera	Tachinidae				BOLD:ACY2619
Insecta	Diptera	Tachinidae				BOLD:ADC1062
Insecta	Diptera	Tachinidae				BOLD:ADE8116
Insecta	Diptera	Tachinidae				BOLD:ADG9685
Insecta	Diptera	Tachinidae				BOLD:ADH1738
Insecta	Diptera	Tachinidae				BOLD:ADH3200
Insecta	Diptera	Tachinidae				BOLD:ADQ0558
Insecta	Diptera	Tachinidae				BOLD:ADU8216
Insecta	Diptera	Tachinidae				BOLD:ADW7094
Insecta	Diptera	Tachinidae				BOLD:ADW9892
Insecta	Diptera	Tachinidae				BOLD:ADZ3707
Insecta	Diptera	Tephritidae				BOLD:AAG3430
Insecta	Diptera	Tephritidae				BOLD:ABV1257
Insecta	Diptera	Tephritidae				BOLD:ACW5610
Insecta	Diptera	Tephritidae				BOLD:ADS6335
Insecta	Diptera	Tipulidae	Tipulinae	Nephrotoma		BOLD:AAI3209
Insecta	Diptera	Tipulidae	Tipulinae	Tipula		BOLD:AAF8163
Insecta	Diptera					BOLD:ADH4383
Insecta	Diptera					BOLD:ADJ1073
Insecta	Diptera					BOLD:ADJ1810
Insecta	Diptera					BOLD:ADJ8101
Insecta	Diptera					BOLD:ADK0626
Insecta	Diptera					BOLD:ADS7578
Insecta	Diptera					BOLD:ADS8317
Insecta	Diptera					BOLD:ADT8310
Insecta	Diptera					BOLD:ADT9266
Insecta	Diptera					BOLD:ADV0471
Insecta	Diptera					BOLD:ADV0486
Insecta	Diptera					BOLD:ADV2594
Insecta	Diptera					BOLD:ADV3338
Insecta	Diptera					BOLD:ADV4051
Insecta	Diptera					BOLD:ADV4250
Insecta	Diptera					BOLD:ADV4846
Insecta	Diptera					BOLD:ADZ8463
Insecta	Ephemeroptera	Baetidae	Baetinae	Cloeon	Cloeon marginale, Cloeon sp. Yano-2017	BOLD:ADK0673	Predator
Insecta	Ephemeroptera	Baetidae	Baetinae	Cloeon	Cloeon sp. GUAM1, Cloeon sp. Yano-2017, Cloeon sp. TH4, Cloeon navasi	BOLD:AAG5740	Pest
Insecta	Ephemeroptera	Baetidae	Baetinae	Cloeon	Cloeon virens, Cloeon sp. TH2	BOLD:AAG5734	Predator
Insecta	Hemiptera	Aleyrodidae	Aleyrodinae	Aleuroclava	Aleuroclava indicus	BOLD:ACB8736	Pest
Insecta	Hemiptera	Aleyrodidae	Aleyrodinae	Aleuroclava	Aleuroclava rhododendri	BOLD:ACB8735	Pest
Insecta	Hemiptera	Cicadellidae	Megophthalminae, Typhlocybinae	Empoasca, Amrasca	Amrasca biguttula, Empoasca sp. iihr_bpl_lhb 6	BOLD:ACB8550	Pest
Insecta	Hemiptera	Anthocoridae	Anthocorinae	Anthocoris	Anthocoris antevolens	BOLD:ACD5166	Predator
Insecta	Hemiptera	Anthocoridae, Coreidae	Coreinae, Anthocorinae	Acanthocoris, Anthocoris	Anthocoris kerzhneri, Acanthocoris sordidus	BOLD:ACD6649	Predator
Insecta	Hemiptera	Aphididae	Aphidinae	Aphis	Aphis celastrii	BOLD:AAI4332	Pest
Insecta	Hemiptera	Aphididae	Aphidinae	Aphis	Aphis frangulae, Aphis confusa, Aphis hypericiphaga, Aphis sp. K-5 no.3, Aphis forbesi, Aphis monardae, Aphis parietariae, Aphis hypochoeridis, Aphis sp. K-2 no.3, Aphis viticis, Aphis sp. E rgf-2008, Aphis sp. K-2 no.4, Aphis clerodendri, Aphis sp. D rgf-2008, Aphis sp. C rgf-2008, Aphis plantaginis, Aphis egomae, Aphis sp. 3 DML-2014, Aphis oestlundi, Aphis idaei, Aphis sp., Aphis argrimoniae, …	BOLD:AAA3070	Pest
Insecta	Hemiptera	Aphididae	Aphidinae	Aphis	Aphis ichigocola	BOLD:ACB7870	Pest
Insecta	Hemiptera	Aphididae	Aphidinae	Aphis	Aphis intybi, Aphis fabae, Aphis coronillae, Aphis craccivora, Aphis euphorbiae, Aphis masoni, Aphis rumicis, Aphis tirucallis	BOLD:AAB7937	Pest
Insecta	Hemiptera	Aphididae	Aphidinae	Aphis	Aphis spiraecola, Aphis helianthi	BOLD:AAA4183	Pest
Insecta	Hemiptera	Miridae	Mirinae	Apolygus	Apolygus pulchellus	BOLD:ADV8329	Parasitoid
Insecta	Hemiptera	Cicadellidae	Deltocephalinae	Balclutha	Balclutha incisa, Balclutha sp.	BOLD:AAC9294	Pest
Insecta	Hemiptera	Aleyrodidae	Aleyrodinae	Bemisia	Bemisia tabaci	BOLD:AAG4846	Pest
Insecta	Hemiptera	Aleyrodidae	Aleyrodinae	Bemisia	Bemisia tabaci	BOLD:AAM1247	Pest
Insecta	Hemiptera	Aleyrodidae	Aleyrodinae	Bemisia	Bemisia tabaci AsiaII 3	BOLD:ADC0726	Pest
Insecta	Hemiptera	Aphalaridae	Spondyliaspidinae	Blastopsylla	Blastopsylla occidentalis	BOLD:ACQ1185	Pest
Insecta	Hemiptera	Miridae	Phylinae	Campylomma	Campylomma verbasci, Campylomma livida	BOLD:ACM0164	Pest
Insecta	Hemiptera	Aphididae	Aphidinae	Capitophorus	Capitophorus hippophaes	BOLD:AAI3665	Pest
Insecta	Hemiptera	Aphididae	Aphidinae	Capitophorus	Capitophorus hippophaes	BOLD:ADY6417	Pest
Insecta	Hemiptera	Delphacidae	Delphacinae	Cemus	Cemus zhitus, Cemus sauteri	BOLD:AAV4239	Pest
Insecta	Hemiptera	Coreidae	Coreinae	Cletus	Cletus bipunctatus	BOLD:AAZ6797	Pest
Insecta	Hemiptera	Plataspidae	Plataspidinae	Coptosoma	Coptosoma parvipictum	BOLD:ADU0100	Pest
Insecta	Hemiptera	Tingidae	Tinginae	Corythucha	Corythucha sp. HP28, Corythucha marmorata	BOLD:AAR9127	Pest
Insecta	Hemiptera	Aphididae	Aphidinae	Cryptomyzus	Cryptomyzus ribis	BOLD:ACN0670	Pest
Insecta	Hemiptera	Aleyrodidae	Aleyrodinae	Dialeurodes	Dialeurodes citri	BOLD:ACB8196	Pest
Insecta	Hemiptera	Aleyrodidae	Aleyrodinae	Dialeurodes	Dialeurodes hongkongensis	BOLD:ACB8207	Pest
Insecta	Hemiptera	Liviidae	Euphyllurinae	Diaphorina	Diaphorina citri	BOLD:AAT8865	Pest
Insecta	Hemiptera	Rhyparochromidae, Pyrrhocoridae		Dysdercus	Dysdercus cingulatus	BOLD:ACD5362	Pest
Insecta	Hemiptera	Cicadellidae	Typhlocybinae	Empoasca		BOLD:ADU2373
Insecta	Hemiptera	Pentatomidae	Pentatominae	Erthesina	Erthesina fullo	BOLD:ADK4813	Pest
Insecta	Hemiptera	Aphididae	Lachninae	Eulachnus	Eulachnus thunbergii	BOLD:ACJ6228	Pest
Insecta	Hemiptera	Pentatomidae	Pentatominae	Eysarcoris	Eysarcoris annamita	BOLD:ADV0745	Pest
Insecta	Hemiptera	Pentatomidae	Pentatominae	Eysarcoris	Eysarcoris guttigerus	BOLD:ADV6018	Pest
Insecta	Hemiptera	Pentatomidae	Pentatominae	Eysarcoris	Eysarcoris guttigerus	BOLD:ADV6019	Pest
Insecta	Hemiptera	Geocoridae	Geocorinae	Geocoris	Geocoris pallidipennis	BOLD:ADC8565	Predator
Insecta	Hemiptera	Cicadellidae	Deltocephalinae	Graminella	Graminella nigrinota, Graminella sonorus	BOLD:AAY9516	Pest
Insecta	Hemiptera	Reduviidae	Ectrichodiinae	Haematoloecha	Haematoloecha nigrorufa	BOLD:ACA7161	Predator
Insecta	Hemiptera	Cicadellidae	Deltocephalinae	Hishimonus	Hishimonus hamatus	BOLD:ADT2006	Pest
Insecta	Hemiptera	Cicadellidae	Deltocephalinae	Hishimonus	Hishimonus sellatus	BOLD:ACZ4222	Pest
Insecta	Hemiptera	Aphididae	Aphidinae	Hyalopterus	Hyalopterus pruni	BOLD:ACD8115	Pest
Insecta	Hemiptera	Delphacidae	Delphacinae	Laodelphax	Laodelphax striatella	BOLD:ABY1518	Pest
Insecta	Hemiptera	Aphididae	Aphidinae	Melanaphis	Melanaphis sacchari, Melanaphis japonica	BOLD:AAK7235	Pest
Insecta	Hemiptera	Delphacidae	Delphacinae	Metadelphax	Metadelphax propinqua	BOLD:ABX2193	Pest
Insecta	Hemiptera	Cicadellidae		Mukaria	Mukaria maculata	BOLD:ADV6234	Pest
Insecta	Hemiptera	Aphididae	Aphidinae	Myzus	Myzus persicae	BOLD:AAA7683	Pest
Insecta	Hemiptera	Delphacidae	Delphacinae	Nilaparvata	Nilaparvata bakeri	BOLD:ACV6500	Pest
Insecta	Hemiptera	Delphacidae	Delphacinae	Nilaparvata	Nilaparvata lugens	BOLD:ACA8955	Pest
Insecta	Hemiptera	Lygaeidae	Orsillinae	Nysius	Nysius caledoniae, Nysius graminicola	BOLD:AAG8780	Pest
Insecta	Hemiptera	Lygaeidae	Orsillinae	Nysius	Nysius plebeius, Nysius clevelandensis	BOLD:AAI3382	Pest
Insecta	Hemiptera	Anthocoridae	Anthocorinae	Orius	Orius minutus	BOLD:ADA2620	Predator
Insecta	Hemiptera	Aphididae	Eriosomatinae	Pemphigus	Pemphigus populitransversus	BOLD:AAC5979	Pest
Insecta	Hemiptera	Aphididae	Aphidinae	Phorodon	Phorodon humuli	BOLD:ADV3186	Pest
Insecta	Hemiptera	Pentatomidae	Asopinae	Picromerus	Picromerus sp., Picromerus lewisi	BOLD:ACV9845	Predator
Insecta	Hemiptera	Pentatomidae	Pentatominae	Plautia	Plautia stali	BOLD:ACD5574	Pest
Insecta	Hemiptera	Aphididae	Aphidinae, Saltusaphidinae	Saltusaphis, Rhopalosiphum	Rhopalosiphum rufiabdominalis, Rhopalosiphum rufiabdominale, Saltusaphis sp. YW-2015	BOLD:AAI0406	Pest
Insecta	Hemiptera	Ricaniidae	Ricaniinae	Ricania	Ricania speculum	BOLD:ADV8098	Pest
Insecta	Hemiptera	Alydidae	Alydinae	Riptortus	Riptortus clavatus	BOLD:ACV7036	Pest
Insecta	Hemiptera	Alydidae	Alydinae	Riptortus	Riptortus pedestris	BOLD:ADC7670	Pest
Insecta	Hemiptera	Alydidae	Alydinae	Riptortus	Riptortus sp. HK-2014, Riptortus pedestris	BOLD:ACV7033	Pest
Insecta	Hemiptera	Aphididae	Aphidinae	Schizaphis	Schizaphis graminum	BOLD:ABV9069	Pest
Insecta	Hemiptera	Aphididae	Aphidinae	Sitobion	Sitobion avenae	BOLD:AAB4894	Pest
Insecta	Hemiptera	Aphididae	Aphidinae	Sitobion	Sitobion avenae	BOLD:ADV2414	Pest
Insecta	Hemiptera	Aphididae	Aphidinae	Sitobion	Sitobion ibarae	BOLD:ACY7130	Pest
Insecta	Hemiptera	Delphacidae	Delphacinae	Sogatella	Sogatella furcifera, Sogatella vibix	BOLD:ABW1267	Pest
Insecta	Hemiptera	Miridae	Mirinae	Taylorilygus	Taylorilygus apicalis	BOLD:ACY9106	Pest
Insecta	Hemiptera	Aphididae	Calaphidinae	Therioaphis	Therioaphis trifolii	BOLD:AAA3759	Pest
Insecta	Hemiptera	Miridae	Phylinae	Tytthus	Tytthus cf. chinensis, Tytthus chinensis	BOLD:AAZ2082	Predator
Insecta	Hemiptera	Aphididae	Aphidinae	Uroleucon	Uroleucon formosanum	BOLD:ACW0075	Pest
Insecta	Hemiptera	Aleyrodidae				BOLD:ACP9143
Insecta	Hemiptera	Aphididae	Anoeciinae	Anoecia		BOLD:ACC2722
Insecta	Hemiptera	Aphididae	Aphidinae	Sitobion		BOLD:ADV0047
Insecta	Hemiptera	Aphididae	Aphidinae			BOLD:ADS9771
Insecta	Hemiptera	Aphrophoridae				BOLD:ADJ2201
Insecta	Hemiptera	Berytidae				BOLD:ACZ2557
Insecta	Hemiptera	Cicadellidae	Deltocephalinae	Graminella		BOLD:ADY7958
Insecta	Hemiptera	Cicadellidae				BOLD:ABY1519
Insecta	Hemiptera	Cicadellidae				BOLD:ACF7251
Insecta	Hemiptera	Cicadellidae				BOLD:ACN3744
Insecta	Hemiptera	Cicadellidae				BOLD:ACO2045
Insecta	Hemiptera	Cicadellidae				BOLD:ACO3013
Insecta	Hemiptera	Cicadellidae				BOLD:ACO3251
Insecta	Hemiptera	Cicadellidae				BOLD:ACO7761
Insecta	Hemiptera	Cicadellidae				BOLD:ACP7706
Insecta	Hemiptera	Cicadellidae				BOLD:ACS8161
Insecta	Hemiptera	Cicadellidae				BOLD:ACV2552
Insecta	Hemiptera	Cicadellidae				BOLD:ACV3092
Insecta	Hemiptera	Cicadellidae				BOLD:ACX0959
Insecta	Hemiptera	Cicadellidae				BOLD:ADI9195
Insecta	Hemiptera	Cicadellidae				BOLD:ADJ5085
Insecta	Hemiptera	Cicadellidae				BOLD:ADP6663
Insecta	Hemiptera	Cicadellidae				BOLD:ADT3752
Insecta	Hemiptera	Cicadellidae				BOLD:ADT7112
Insecta	Hemiptera	Cicadellidae				BOLD:ADT8937
Insecta	Hemiptera	Cicadellidae				BOLD:ADU6381
Insecta	Hemiptera	Cicadellidae				BOLD:ADV5171
Insecta	Hemiptera	Pyrrhocoridae		Armatillus		BOLD:AEB3289
Insecta	Hemiptera	Rhopalidae	Rhopalinae	Rhopalus		BOLD:ADU2140
Insecta	Hymenoptera	Pompilidae	Pompilinae	Agenioideus	Agenioideus cinctellus	BOLD:ABA5974	Predator
Insecta	Hymenoptera	Ichneumonidae	Anomaloninae	Agrypon	Agrypon hilare	BOLD:ACH4258	Parasitoid
Insecta	Hymenoptera	Braconidae	Rogadinae	Aleiodes	Aleiodes buzurae, Aleiodes probuzurae	BOLD:AAH8658	Parasitoid
Insecta	Hymenoptera	Tenthredinidae	Allantinae	Allantus	Allantus basalis	BOLD:ACO1385	Pest
Insecta	Hymenoptera	Tenthredinidae	Allantinae	Allantus	Allantus luctifer	BOLD:ACO8611	Pest
Insecta	Hymenoptera	Tenthredinidae	Allantinae	Allantus	Allantus luctifer	BOLD:ADO0414	Pest
Insecta	Hymenoptera	Tenthredinidae	Allantinae	Allantus	Allantus mellipes	BOLD:ABA5928	Pest
Insecta	Hymenoptera	Tenthredinidae	Allantinae	Allantus	Allantus nigritibialis	BOLD:ACO4834	Pest
Insecta	Hymenoptera	Ichneumonidae	Cryptinae	Allophatnus	Allophatnus fulvitergus	BOLD:ACW6106	Parasitoid
Insecta	Hymenoptera	Apidae	Apinae	Apis	Amegilla himalajensis, Apis nigrocincta, Apis cerana	BOLD:AAM5455	Pollinator
Insecta	Hymenoptera	Apidae	Apinae	Amegilla	Amegilla SE Asia 06, Amegilla cingulifera	BOLD:AAJ2255	Pollinator
Insecta	Hymenoptera	Apidae	Apinae	Amegilla		BOLD:AAJ4631
Insecta	Hymenoptera	Tenthredinidae	Allantinae	Ametastegia	Ametastegia pulchella	BOLD:ADC2372	Pest
Insecta	Hymenoptera	Pompilidae	Pompilinae	Anoplius	Anoplius alpinobalticus	BOLD:ABY2333	Predator
Insecta	Hymenoptera	Braconidae, Pteromalidae	Microgastrinae, Miscogasterinae	Apanteles	Apanteles carpatus	BOLD:AAC2372	Parasitoid
Insecta	Hymenoptera	Braconidae	Microgastrinae	Apanteles	Apanteles inunctus	BOLD:ADG1290	Parasitoid
Insecta	Hymenoptera	Braconidae	Microgastrinae	Apanteles	Apanteles jason, Apanteles melpomene	BOLD:AAH1089	Parasitoid
Insecta	Hymenoptera	Braconidae	Microgastrinae	Apanteles	Apanteles lenea	BOLD:AAB1923	Parasitoid
Insecta	Hymenoptera	Braconidae	Microgastrinae	Apanteles	Apanteles machaeralis	BOLD:ADM0372	Parasitoid
Insecta	Hymenoptera	Braconidae	Microgastrinae	Apanteles	Apanteles penelope	BOLD:ADG1545	Parasitoid
Insecta	Hymenoptera	Braconidae	Microgastrinae	Apanteles		BOLD:ABY2703
Insecta	Hymenoptera	Braconidae	Microgastrinae	Apanteles		BOLD:AAB1924
Insecta	Hymenoptera	Braconidae	Microgastrinae	Apanteles	Apanteles sp., Apanteles PK03, Apanteles sp. 6 SY-2018, Apanteles merope, Apanteles sp. AAZ_054	BOLD:AAH1201	Parasitoid
Insecta	Hymenoptera	Braconidae	Microgastrinae	Apanteles		BOLD:AAV2096
Insecta	Hymenoptera	Braconidae	Microgastrinae	Apanteles	Apanteles sp., Apanteles taragamae, Apanteles sp. GTB274DN1854	BOLD:ACJ8648	Parasitoid
Insecta	Hymenoptera	Braconidae	Aphidiinae	Aphidius	Aphidius avenaphis, Aphidius uzbekistanicus, Aphidius ervi	BOLD:AAJ1250	Parasitoid
Insecta	Hymenoptera	Braconidae	Aphidiinae	Aphidius	Aphidius ervi	BOLD:ACK4754	Parasitoid
Insecta	Hymenoptera	Braconidae	Aphidiinae	Aphidius	Aphidius gifuensis	BOLD:ACZ8625	Parasitoid
Insecta	Hymenoptera	Braconidae	Aphidiinae	Aphidius	Aphidius gifuensis	BOLD:ADV3015	Parasitoid
Insecta	Hymenoptera	Braconidae	Aphidiinae	Aphidius	Aphidius rhopalosiphi	BOLD:ACO2007	Parasitoid
Insecta	Hymenoptera	Braconidae	Aphidiinae	Aphidius	Aphidius rhopalosiphi, Aphidius matricariae, Aphidius urticae, Aphidius cingulatus	BOLD:ACF4786	Parasitoid
Insecta	Hymenoptera	Braconidae	Aphidiinae	Aphidius	Aphidius rhopalosiphi, Aphidius urticae, Aphidius cingulatus, Aphidius tarsalis	BOLD:ABZ3101	Parasitoid
Insecta	Hymenoptera	Braconidae	Aphidiinae	Aphidius	Aphidius rhopalosiphi, Aphidius urticae, Aphidius gifuensis, Aphidius ervi	BOLD:AAD6802	Parasitoid
Insecta	Hymenoptera	Braconidae	Aphidiinae	Diaeretiella, Aphidius	Aphidius viaticus, Diaeretiella rapae	BOLD:AAG1421	Parasitoid
Insecta	Hymenoptera	Apidae	Apinae	Apis	Apis cerana	BOLD:ABY8399	Pollinator
Insecta	Hymenoptera	Apidae	Apinae	Apis	Apis mellifera capensis, Andrena rubi, Apis dorsata, Apis mellifera, Apis mellifera sahariensis, Apis cerana	BOLD:AAA2326	Pollinator
Insecta	Hymenoptera	Braconidae	Alysiinae	Asobara		BOLD:ACF3746
Insecta	Hymenoptera	Braconidae	Alysiinae	Asobara		BOLD:ACP4715
Insecta	Hymenoptera	Tenthredinidae	Allantinae	Athalia	Athalia proxima, Athalia infumata	BOLD:ACZ5715	Pest
Insecta	Hymenoptera	Ichneumonidae	Cryptinae	Atractodes	Atractodes fumatus	BOLD:ACC1594	Parasitoid
Insecta	Hymenoptera	Pompilidae	Pepsinae	Auplopus	Auplopus carbonarius	BOLD:AAZ1472	Parasitoid
Insecta	Hymenoptera	Pompilidae	Pepsinae	Auplopus	Auplopus carbonarius	BOLD:ACQ6676	Parasitoid
Insecta	Hymenoptera	Pompilidae	Pepsinae	Auplopus	Auplopus carbonarius	BOLD:ADT3837	Parasitoid
Insecta	Hymenoptera	Pompilidae	Pepsinae	Auplopus	Auplopus carbonarius, Auplopus sp. SJW-2017	BOLD:ADV2159	Parasitoid
Insecta	Hymenoptera	Diapriidae	Diapriinae	Aneurhynchus, Basalys	Basalys oberbergensis, Aneurhynchus galesiformis, Basalys breisgauensis, Basalys orion	BOLD:AAU9056	Parasitoid
Insecta	Hymenoptera	Braconidae	Aphidiinae	Binodoxys	Binodoxys angelicae	BOLD:ACB8002	Parasitoid
Insecta	Hymenoptera	Braconidae	Aphidiinae	Binodoxys	Binodoxys angelicae	BOLD:ACD8366	Parasitoid
Insecta	Hymenoptera	Braconidae	Braconinae	Bracon	Bracon garugaphagae	BOLD:ADM1796	Parasitoid
Insecta	Hymenoptera	Braconidae	Cardiochilinae	Cardiochiles	Cardiochiles fuscipennis	BOLD:ACV9844	Parasitoid
Insecta	Hymenoptera	Apidae	Xylocopinae	Ceratina	Ceratina nigrolateralis, Ceratina cf. nigrolateralis, Ceratina collusor, Ceratina coptica	BOLD:AAI7482	Pollinator
Insecta	Hymenoptera	Apidae	Xylocopinae	Ceratina	Ceratina smaragdula, Ceratina binghami	BOLD:AAF1368	Pollinator
Insecta	Hymenoptera	Philanthidae	Philanthinae	Cerceris		BOLD:AEC0959
Insecta	Hymenoptera	Sphecidae	Sceliphrinae	Chalybion	Chalybion bengalense	BOLD:AAH3474	Predator
Insecta	Hymenoptera	Ichneumonidae	Campopleginae	Hyposoter, Charops		BOLD:AAH1999
Insecta	Hymenoptera	Braconidae	Cheloninae	Chelonus		BOLD:AAH0570
Insecta	Hymenoptera	Ichneumonidae	Cryptinae	Chlorocryptus	Chlorocryptus purpuratus	BOLD:ACQ2826	Parasitoid
Insecta	Hymenoptera	Braconidae	Microgastrinae	Choeras		BOLD:ACE8680
Insecta	Hymenoptera	Braconidae	Microgastrinae	Choeras		BOLD:ABY8486
Insecta	Hymenoptera	Braconidae	Microgastrinae	Choeras		BOLD:AAH1252
Insecta	Hymenoptera	Braconidae	Microgastrinae	Choeras		BOLD:AAH1193
Insecta	Hymenoptera	Braconidae	Alysiinae	Chorebus	Chorebus lateralis, Chorebus credne, Chorebus bres	BOLD:AAG1322	Parasitoid
Insecta	Hymenoptera	Chrysididae	Chrysidinae	Chrysis	Chrysis westerlundi, Chrysis provancheri	BOLD:AAL7397	Pollinator
Insecta	Hymenoptera	Chrysididae	Cleptinae	Cleptes	Cleptes metallicorpus	BOLD:ADX6581	Parasitoid
Insecta	Hymenoptera	Megachilidae	Megachilinae	Coelioxys	Coelioxys confusa	BOLD:ABX6904	Pollinator
Insecta	Hymenoptera	Ichneumonidae	Metopiinae	Colpotrochia	Colpotrochia cincta	BOLD:ACF7930	Parasitoid
Insecta	Hymenoptera	Ichneumonidae	Metopiinae	Colpotrochia	Colpotrochia jozankeana, Colpotrochia pilosa	BOLD:ADK9791	Parasitoid
Insecta	Hymenoptera	Encyrtidae	Encyrtinae	Copidosoma	Copidosoma floridanum	BOLD:ACQ4091	Parasitoid
Insecta	Hymenoptera	Braconidae	Microgastrinae	Cotesia	Cotesia erionotae	BOLD:ACY9028	Parasitoid
Insecta	Hymenoptera	Braconidae	Microgastrinae	Cotesia	Cotesia glabrata	BOLD:AAV9097	Parasitoid
Insecta	Hymenoptera	Braconidae	Microgastrinae	Cotesia	Cotesia jft31, Cotesia eliniae, Cotesia zygaenarum, Cotesia halli	BOLD:ACE6464	Parasitoid
Insecta	Hymenoptera	Braconidae	Microgastrinae	Cotesia		BOLD:ACF2838
Insecta	Hymenoptera	Braconidae	Microgastrinae	Cotesia		BOLD:ACE9505
Insecta	Hymenoptera	Braconidae	Microgastrinae	Cotesia		BOLD:AAH1335
Insecta	Hymenoptera	Braconidae	Microgastrinae	Cotesia	Cotesia kariyai	BOLD:ACD3988	Parasitoid
Insecta	Hymenoptera	Braconidae	Microgastrinae	Cotesia		BOLD:ADC0710
Insecta	Hymenoptera	Braconidae	Microgastrinae	Cotesia	Cotesia PK07, Cotesia pilicornis, Cotesia sp.	BOLD:ACZ1256	Parasitoid
Insecta	Hymenoptera	Braconidae	Microgastrinae	Cotesia	Cotesia rubecula, Cotesia lunata	BOLD:ACF1247	Parasitoid
Insecta	Hymenoptera	Braconidae	Microgastrinae	Cotesia	Cotesia ruficrus	BOLD:ABZ1947	Parasitoid
Insecta	Hymenoptera	Braconidae	Microgastrinae	Cotesia	Cotesia ruficrus	BOLD:ADL6804	Parasitoid
Insecta	Hymenoptera	Braconidae	Microgastrinae	Cotesia		BOLD:AAH1084
Insecta	Hymenoptera	Braconidae	Microgastrinae	Cotesia	Cotesia urabae, Cotesia jft94	BOLD:ABZ5517	Parasitoid
Insecta	Hymenoptera	Braconidae	Microgastrinae	Cotesia	Cotesia vestalis, Cotesia PK04, Cotesia jft52, Cotesia icipe	BOLD:ABZ7318	Parasitoid
Insecta	Hymenoptera	Braconidae	Microgastrinae	Cotesia	Cotesia vestalis, Cotesia plutellae	BOLD:ABZ6416	Parasitoid
Insecta	Hymenoptera	Braconidae	Alysiinae	Cratospila		BOLD:AAJ6440
Insecta	Hymenoptera	Pompilidae	Pepsinae	Cryptocheilus	Cryptocheilus elegans, Cryptocheilus fabricii	BOLD:AAN9269	Parasitoid
Insecta	Hymenoptera	Ichneumonidae	Tryphoninae	Ctenochira	Ctenochira genalis	BOLD:AAI9994	Parasitoid
Insecta	Hymenoptera	Braconidae	Alysiinae	Dinotrema		BOLD:ABZ5628
Insecta	Hymenoptera	Braconidae	Alysiinae	Dinotrema		BOLD:AAH2151
Insecta	Hymenoptera	Braconidae	Alysiinae	Dinotrema		BOLD:AAA7636
Insecta	Hymenoptera	Ichneumonidae	Diplazontinae	Diplazon	Diplazon laetatorius, Diplazon sp. O49	BOLD:AAD4214	Parasitoid
Insecta	Hymenoptera	Ichneumonidae	Diplazontinae	Diplazon	Diplazon orientalis	BOLD:ACK6083	Parasitoid
Insecta	Hymenoptera	Ichneumonidae	Diplazontinae	Diplazon	Diplazon scutatorius, Diplazon tetragonus	BOLD:AAL2105	Parasitoid
Insecta	Hymenoptera	Braconidae	Microgastrinae	Dolichogenidea	Dolichogenidea cerialis	BOLD:AAZ9570	Parasitoid
Insecta	Hymenoptera	Ichneumonidae	Campopleginae	Dusona	Dusona auriculator	BOLD:AAZ9493	Parasitoid
Insecta	Hymenoptera	Ichneumonidae	Campopleginae	Dusona	Dusona juvenilis	BOLD:ACR3198	Parasitoid
Insecta	Hymenoptera	Braconidae	Braconinae	Ectemnoplax	Ectemnoplax peruliventris	BOLD:ADH4419	Parasitoid
Insecta	Hymenoptera	Ichneumonidae	Ophioninae	Enicospilus	Enicospilus lineolatus	BOLD:AAI5181	Parasitoid
Insecta	Hymenoptera	Ichneumonidae	Ophioninae	Enicospilus	Enicospilus melanocarpus	BOLD:ACN6789	Parasitoid
Insecta	Hymenoptera	Ichneumonidae	Ophioninae	Enicospilus	Enicospilus merdarius	BOLD:AEC6060	Parasitoid
Insecta	Hymenoptera	Ichneumonidae	Ophioninae	Enicospilus	Enicospilus ugaldei	BOLD:AAC6002	Parasitoid
Insecta	Hymenoptera	Ichneumonidae	Ophioninae	Enicospilus	Enicospilus yonezawanus	BOLD:AAI5182	Parasitoid
Insecta	Hymenoptera	Ichneumonidae	Campopleginae	Eriborus	Eriborus obscuripes	BOLD:ADD2082	Parasitoid
Insecta	Hymenoptera	Ichneumonidae	Tryphoninae	Erromenus	Erromenus zonarius, Erromenus brunnicans	BOLD:ACV8179	Parasitoid
Insecta	Hymenoptera	Vespidae	Eumeninae	Eumenes	Eumenes coarctatus, Eumenes coronatus	BOLD:AAN3639	Predator
Insecta	Hymenoptera	Vespidae	Eumeninae	Euodynerus	Euodynerus notatus	BOLD:AAN0689	Predator
Insecta	Hymenoptera	Ichneumonidae	Cryptinae	Eurycryptus	Eurycryptus unicolor	BOLD:ADK7581	Parasitoid
Insecta	Hymenoptera	Braconidae	Braconinae	Euurobracon	Euurobracon breviterebrae	BOLD:ACW0313	Parasitoid
Insecta	Hymenoptera	Ichneumonidae	Metopiinae	Exochus	Exochus momoii	BOLD:ADK4281	Parasitoid
Insecta	Hymenoptera	Gasteruptiidae	Gasteruptiinae	Gasteruption	Gasteruption parvicollarium	BOLD:ADY3278	Parasitoid
Insecta	Hymenoptera	Gasteruptiidae	Gasteruptiinae	Gasteruption		BOLD:ADM4579
Insecta	Hymenoptera	Braconidae	Microgastrinae	Glyptapanteles	Glyptapanteles creatonoti	BOLD:AAH1268	Parasitoid
Insecta	Hymenoptera	Ichneumonidae	Orthocentrinae	Gnathochorisis	Gnathochorisis flavipes	BOLD:ACP8759	Pest
Insecta	Hymenoptera	Halictidae	Nomiinae	Nomia, Gnathonomia	Gnathonomia thoracica, Nomia thoracica	BOLD:AAI7401	pollinator
Insecta	Hymenoptera	Ichneumonidae	Cryptinae	Gotra	Gotra marginata	BOLD:AAZ8561	Parasitoid
Insecta	Hymenoptera	Halictidae	Halictinae	Halictus	Halictus aerarius	BOLD:AAI6489	Pollinator
Insecta	Hymenoptera	Halictidae	Halictinae	Halictus	Halictus aff. aerarius	BOLD:ACZ4664	Pest
Insecta	Hymenoptera	Ichneumonidae	Cryptinae	Hedycryptus	Hedycryptus rufopetiolatus	BOLD:ADV0662	Parasitoid
Insecta	Hymenoptera	Megachilidae	Megachilinae	Heriades	Heriades sauteri, Heriades ma02, Heriades SEA01, Heriades sp., Heriades sp. serian	BOLD:AAI1851	Pollinator
Insecta	Hymenoptera	Braconidae	Alysiinae	Heterolexis	Heterolexis balteata	BOLD:ACR0084	Parasitoid
Insecta	Hymenoptera	Halictidae	Nomiinae	Nomia, Hoplonomia	Hoplonomia incerta, Nomia incerta	BOLD:AAE1639	Pollinator
Insecta	Hymenoptera	Colletidae	Hylaeinae	Hylaeus		BOLD:ACT9841
Insecta	Hymenoptera	Ichneumonidae	Campopleginae	Hyposoter	Hyposoter didymator	BOLD:ACP5618	Parasitoid
Insecta	Hymenoptera	Ichneumonidae	Campopleginae	Hyposoter		BOLD:AAM7398
Insecta	Hymenoptera	Ichneumonidae	Cryptinae	Idiolispa, Trychosis	Idiolispa analis, Trychosis ambigua	BOLD:ABX6817	Parasitoid
Insecta	Hymenoptera	Ichneumonidae	Cryptinae	Idiolispa		BOLD:AAH1855
Insecta	Hymenoptera	Ichneumonidae	Cryptinae	Isotima	Isotima rufithorax	BOLD:ADU1057	Parasitoid
Insecta	Hymenoptera	Halictidae	Halictinae	Lasioglossum	Lasioglossum affine	BOLD:AAW9973	Pest
Insecta	Hymenoptera	Halictidae	Halictinae	Lasioglossum	Lasioglossum kumejimense	BOLD:AAJ1693	Pest
Insecta	Hymenoptera	Halictidae	Halictinae	Lasioglossum	Lasioglossum R1, Lasioglossum scitulum	BOLD:AAN9689	Pollinator
Insecta	Hymenoptera	Braconidae	Euphorinae	Leiophron		BOLD:ADT7907
Insecta	Hymenoptera	Braconidae	Aphidiinae	Lipolexis	Lipolexis gracilis	BOLD:ADB8872	Parasitoid
Insecta	Hymenoptera	Braconidae	Aphidiinae	Lipolexis	Lipolexis oregmae	BOLD:AAJ2061	Pest
Insecta	Hymenoptera	Crabronidae		Liris	Liris festinans	BOLD:ACA3046	Predator
Insecta	Hymenoptera	Pompilidae	Pepsinae	Lissocnemis		BOLD:ADV6510
Insecta	Hymenoptera	Braconidae	Aphidiinae	Lysiphlebia	Lysiphlebia japonica	BOLD:ADJ8129	Parasitoid
Insecta	Hymenoptera	Braconidae	Aphidiinae	Lysiphlebia, Lysiphlebus	Lysiphlebus orientalis, Lysiphlebia japonica	BOLD:ACQ8273	Parasitoid
Insecta	Hymenoptera	Ichneumonidae	Mesochorinae	Mesochorus	Mesochorus faciator	BOLD:ACT9619	Parasitoid
Insecta	Hymenoptera	Braconidae	Microgastrinae	Microplitis	Microplitis fraudulentus, Microplitis eremitus, Microplitis strenuus, Microplitis jft111, Microplitis xanthopus, Microplitis jft112	BOLD:AAA3092	Parasitoid
Insecta	Hymenoptera	Braconidae	Microgastrinae	Microplitis		BOLD:AAI1514
Insecta	Hymenoptera	Braconidae	Microgastrinae	Microplitis	Microplitis maculipennis	BOLD:ACV9232	Parasitoid
Insecta	Hymenoptera	Braconidae	Microgastrinae	Microplitis	Microplitis mediator, Microplitis varicolor	BOLD:AAA2408	Parasitoid
Insecta	Hymenoptera	Braconidae	Microgastrinae	Microplitis	Microplitis mediator, Microplitis varicolor	BOLD:ACY8113	Parasitoid
Insecta	Hymenoptera	Braconidae	Microgastrinae	Microplitis	Microplitis PK06, Microplitis similis, Microplitis prodeniae	BOLD:AAQ3083	Parasitoid
Insecta	Hymenoptera	Braconidae	Microgastrinae	Microplitis		BOLD:ACR5071
Insecta	Hymenoptera	Braconidae	Microgastrinae	Microplitis		BOLD:ADH1757
Insecta	Hymenoptera	Braconidae	Microgastrinae	Microplitis	Microplitis varicolor	BOLD:ACY8112	Pest
Insecta	Hymenoptera	Tenthredinidae	Nematinae	Moricella	Moricella rufonota	BOLD:ABV5727	Pest
Insecta	Hymenoptera	Ichneumonidae	Ichneumoninae	Neotypus	Neotypus nobilitator	BOLD:ADC1063	Parasitoid
Insecta	Hymenoptera	Ichneumonidae	Campopleginae	Olesicampe	Olesicampe melanogaster	BOLD:AAH1712	Parasitoid
Insecta	Hymenoptera	Ichneumonidae	Campopleginae	Olesicampe	Olesicampe melanogaster	BOLD:ACP9334	Parasitoid
Insecta	Hymenoptera	Ichneumonidae	Campopleginae	Olesicampe	Olesicampe melanogaster	BOLD:ACP9433	Parasitoid
Insecta	Hymenoptera	Braconidae	Opiinae	Opius	Opius crenuliferus	BOLD:ACD8151	Parasitoid
Insecta	Hymenoptera	Braconidae	Opiinae	Opius	Opius pachymerus	BOLD:ADH5997	Parasitoid
Insecta	Hymenoptera	Vespidae	Polistinae	Parapolybia	Parapolybia varia	BOLD:AEA5102	Pest
Insecta	Hymenoptera	Crabronidae	Pemphredoninae	Pemphredon	Pemphredon cf. inornata, Pemphredon inornata	BOLD:ACJ5494	Pest
Insecta	Hymenoptera	Braconidae	Opiinae	Phaedrotoma	Phaedrotoma depressa	BOLD:ABX9282	Parasitoid
Insecta	Hymenoptera	Braconidae	Opiinae	Phaedrotoma	Phaedrotoma vermiculifera	BOLD:ADL6846	Parasitoid
Insecta	Hymenoptera	Ichneumonidae	Cryptinae	Phygadeuon, Stilpnus	Phygadeuon subtilis, Phygadeuon melanurator, Stilpnus fallax	BOLD:AAG9191	Parasitoid
Insecta	Hymenoptera	Ichneumonidae	Cryptinae	Picardiella	Picardiella melanoleuca	BOLD:ABU7134	Pest
Insecta	Hymenoptera	Ichneumonidae	Pimplinae	Pimpla	Pimpla sp., Pimpla laothoe, Pimpla sp. 1	BOLD:AAQ0489	Parasitoid
Insecta	Hymenoptera	Platygastridae	Scelioninae	Platyscelio	Platyscelio pulchricornis	BOLD:ACW9062	Parasitoid
Insecta	Hymenoptera	Ichneumonidae	Orthocentrinae	Plectiscus		BOLD:ACP8469
Insecta	Hymenoptera	Ichneumonidae	Orthocentrinae	Plectiscus	Plectiscus impurator, Plectiscus ridibundus, Plectiscus agilis	BOLD:ABU9109	Parasitoid
Insecta	Hymenoptera	Pompilidae	Pepsinae	Poecilagenia	Poecilagenia sculpturata	BOLD:ACZ0008	Pest
Insecta	Hymenoptera	Vespidae	Polistinae	Polistes	Polistes chinensis	BOLD:AAR7976	Pest
Insecta	Hymenoptera	Vespidae	Polistinae	Polistes	Polistes jokahamae	BOLD:AAY2793	Pest
Insecta	Hymenoptera	Vespidae	Polistinae	Polistes	Polistes snelleni	BOLD:AAH7783	Pest
Insecta	Hymenoptera	Ichneumonidae	Cryptinae	Polytribax	Polytribax penetrator	BOLD:ADA3681	Parasitoid
Insecta	Hymenoptera	Braconidae	Aphidiinae	Praon	Praon volucre	BOLD:ABX2027	Parasitoid
Insecta	Hymenoptera	Braconidae	Aphidiinae	Praon	Praon yomenae	BOLD:ACB7574	Parasitoid
Insecta	Hymenoptera	Tenthredinidae	Nematinae	Pristiphora	Pristiphora nigricans	BOLD:ADS8886	Pest
Insecta	Hymenoptera	Tenthredinidae	Nematinae	Pristiphora	Pristiphora pallidiventris	BOLD:AAU3334	Pest
Insecta	Hymenoptera	Platygastridae	Scelioninae	Psilanteris		BOLD:ACD0663
Insecta	Hymenoptera	Pteromalidae	Pteromalinae	Pteromalus	Pteromalus puparum	BOLD:ADS3281	Parasitoid
Insecta	Hymenoptera	Sphecidae	Sceliphrinae	Sceliphron	Sceliphron madraspatanum	BOLD:AAP9891	Pest
Insecta	Hymenoptera	Ichneumonidae	Pimplinae	Schizopyga	Schizopyga flavifrons	BOLD:ABW3335	Parasitoid
Insecta	Hymenoptera	Ichneumonidae	Cryptinae	Schreineria	Schreineria populnea, Schreineria cingulipes	BOLD:ACR0260	Parasitoid
Insecta	Hymenoptera	Bethylidae	Epyrinae	Sclerodermus	Sclerodermus sichuanensis, Sclerodermus guani, Sclerodermus harmandi, Sclerodermus sp. 1 YJ2014, Sclerodermus sp. 2 YJ2014	BOLD:ADJ9037	Parasitoid
Insecta	Hymenoptera	Scoliidae	Scoliinae	Scolia	Scolia oculata	BOLD:ACQ5469	Parasitoid
Insecta	Hymenoptera	Braconidae	Microgastrinae	Snellenius		BOLD:ADB7288
Insecta	Hymenoptera	Formicidae	Myrmicinae	Solenopsis	Solenopsis invicta	BOLD:AAG5042	Pest
Insecta	Hymenoptera	Braconidae	Euphorinae	Spathicopis	Spathicopis flavocephala	BOLD:ACV9695	Parasitoid
Insecta	Hymenoptera	Ichneumonidae	Diplazontinae	Syrphoctonus	Syrphoctonus cf. tarsatorius, Syrphoctonus tarsatorius, Syrphoctonus pectoralis	BOLD:AAK1321	Parasitoid
Insecta	Hymenoptera	Ichneumonidae	Diplazontinae	Syrphophilus	Syrphophilus bizonarius	BOLD:AAH1949	Predator
Insecta	Hymenoptera	Pompilidae	Pompilinae	Tachypompilus	Tachypompilus analis	BOLD:ACQ5083	Pest
Insecta	Hymenoptera	Formicidae	Dolichoderinae	Technomyrmex	Technomyrmex albipes	BOLD:ACH6123	Pest
Insecta	Hymenoptera	Eulophidae	Tetrastichinae	Tetrastichus		BOLD:ACT4381
Insecta	Hymenoptera	Braconidae	Agathidinae	Therophilus, Zosteragathis	Therophilus festivus	BOLD:AAU4842	Parasitoid
Insecta	Hymenoptera	Torymidae	Toryminae	Torymus		BOLD:ADT7884
Insecta	Hymenoptera	Ichneumonidae	Cremastinae	Trathala	Trathala flavoorbitalis	BOLD:ACV1137	Parasitoid
Insecta	Hymenoptera	Ichneumonidae	Cremastinae	Trathala	Trathala flavoorbitalis	BOLD:ADJ6894	Parasitoid
Insecta	Hymenoptera	Ichneumonidae	Cremastinae	Trathala	Trathala flavoorbitalis	BOLD:ADX9076	Parasitoid
Insecta	Hymenoptera	Ichneumonidae	Cremastinae	Trathala	Trathala flavoorbitalis	BOLD:ADY4119	Parasitoid
Insecta	Hymenoptera	Diapriidae	Diapriinae	Trichopria	Trichopria atricornis	BOLD:ACJ7867	Parasitoid
Insecta	Hymenoptera	Diapriidae	Diapriinae	Trichopria	Trichopria sp. 1 TAS-2012, Trichopria drosophilae, Trichopria verticillata	BOLD:ABX6634	Parasitoid
Insecta	Hymenoptera	Ichneumonidae	Metopiinae	Triclistus	Triclistus globulipes	BOLD:ABV4629	Parasitoid
Insecta	Hymenoptera	Platygastridae	Scelioninae	Trissolcus	Trissolcus japonicus	BOLD:ACC4975	Parasitoid
Insecta	Hymenoptera	Platygastridae	Scelioninae	Trissolcus	Trissolcus plautiae	BOLD:ADB7640	Parasitoid
Insecta	Hymenoptera	Ichneumonidae	Cryptinae	Trychosis	Trychosis tristator	BOLD:ACH4308	Parasitoid
Insecta	Hymenoptera	Crabronidae		Trypoxylon		BOLD:ACP8677
Insecta	Hymenoptera	Crabronidae		Trypoxylon	Trypoxylon sp. PS-2019, Trypoxylon petiolatum	BOLD:ACA2605	Parasitoid
Insecta	Hymenoptera	Vespidae	Vespinae	Vespa	Vespa affinis, Vespa velutina	BOLD:ACH6486	Predator/pollinator
Insecta	Hymenoptera	Vespidae	Vespinae	Vespa	Vespa crabro	BOLD:ABA8441	Pest
Insecta	Hymenoptera	Vespidae	Vespinae	Vespa	Vespa tropica	BOLD:AAU9698	Pest
Insecta	Hymenoptera	Vespidae	Vespinae	Vespa	Vespa velutina	BOLD:AAQ3010	Predator/pollinator
Insecta	Hymenoptera	Ichneumonidae	Ichneumoninae	Virgichneumon	Virgichneumon albilineatus	BOLD:ADK3909	Parasitoid
Insecta	Hymenoptera	Ichneumonidae	Pimplinae	Xanthopimpla		BOLD:AAZ1703
Insecta	Hymenoptera	Ichneumonidae	Pimplinae	Zaglyptus		BOLD:AAZ2411
Insecta	Hymenoptera	Ampulicidae				BOLD:ACW2331
Insecta	Hymenoptera	Aphelinidae	Aphelininae	Aphelinus		BOLD:ABA9128
Insecta	Hymenoptera	Aphelinidae	Aphelininae	Aphelinus		BOLD:ABX2004
Insecta	Hymenoptera	Aphelinidae	Aphelininae	Aphelinus		BOLD:ADS2843
Insecta	Hymenoptera	Apidae	Apinae	Amegilla		BOLD:ACV4640
Insecta	Hymenoptera	Apidae	Xylocopinae	Ceratina		BOLD:ACV4515
Insecta	Hymenoptera	Argidae	Arginae	Arge		BOLD:ACP1010
Insecta	Hymenoptera	Bethylidae				BOLD:ABX2062
Insecta	Hymenoptera	Bethylidae				BOLD:ACD9769
Insecta	Hymenoptera	Bethylidae				BOLD:ACO3850
Insecta	Hymenoptera	Bethylidae				BOLD:ACS3885
Insecta	Hymenoptera	Bethylidae				BOLD:ADB8484
Insecta	Hymenoptera	Bethylidae				BOLD:ADE1717
Insecta	Hymenoptera	Braconidae	Agathidinae	Therophilus		BOLD:ACO9027
Insecta	Hymenoptera	Braconidae	Agathidinae	Zosteragathis		BOLD:AAU4838
Insecta	Hymenoptera	Braconidae	Alysiinae	Asobara		BOLD:ACD0931
Insecta	Hymenoptera	Braconidae	Alysiinae	Dinotrema		BOLD:ABX5161
Insecta	Hymenoptera	Braconidae	Alysiinae	Dinotrema		BOLD:ACC3881
Insecta	Hymenoptera	Braconidae	Alysiinae	Dinotrema		BOLD:ACC6631
Insecta	Hymenoptera	Braconidae	Alysiinae	Dinotrema		BOLD:ACE0995
Insecta	Hymenoptera	Braconidae	Alysiinae	Dinotrema		BOLD:ACG5783
Insecta	Hymenoptera	Braconidae	Alysiinae	Dinotrema		BOLD:ACO5105
Insecta	Hymenoptera	Braconidae	Alysiinae	Dinotrema		BOLD:ACT9449
Insecta	Hymenoptera	Braconidae	Alysiinae	Dinotrema		BOLD:ADF9663
Insecta	Hymenoptera	Braconidae	Alysiinae			BOLD:AAU9196
Insecta	Hymenoptera	Braconidae	Alysiinae			BOLD:ACG1996
Insecta	Hymenoptera	Braconidae	Alysiinae			BOLD:ACR4669
Insecta	Hymenoptera	Braconidae	Alysiinae			BOLD:ADG1114
Insecta	Hymenoptera	Braconidae	Alysiinae			BOLD:ADN8203
Insecta	Hymenoptera	Braconidae	Aphidiinae	Aphidius		BOLD:ACN6140
Insecta	Hymenoptera	Braconidae	Aphidiinae	Aphidius		BOLD:ADI8120
Insecta	Hymenoptera	Braconidae	Aphidiinae	Praon		BOLD:ACD7210
Insecta	Hymenoptera	Braconidae	Braconinae	Bracon		BOLD:ACO6545
Insecta	Hymenoptera	Braconidae	Braconinae	Bracon		BOLD:ACV5814
Insecta	Hymenoptera	Braconidae	Cardiochilinae	Schoenlandella		BOLD:ACA6381
Insecta	Hymenoptera	Braconidae	Cheloninae	Phanerotoma		BOLD:AAI2862
Insecta	Hymenoptera	Braconidae	Doryctinae	Heterospilus		BOLD:ADB8634
Insecta	Hymenoptera	Braconidae	Euphorinae			BOLD:ACO5520
Insecta	Hymenoptera	Braconidae	Euphorinae			BOLD:ACZ6514
Insecta	Hymenoptera	Braconidae	Euphorinae			BOLD:ADG3522
Insecta	Hymenoptera	Braconidae	Macrocentrinae	Macrocentrus		BOLD:ADG3099
Insecta	Hymenoptera	Braconidae	Microgastrinae	Apanteles		BOLD:AAH1273
Insecta	Hymenoptera	Braconidae	Microgastrinae	Apanteles		BOLD:AAV2130
Insecta	Hymenoptera	Braconidae	Microgastrinae	Apanteles		BOLD:ACU8379
Insecta	Hymenoptera	Braconidae	Microgastrinae	Apanteles		BOLD:ACY5862
Insecta	Hymenoptera	Braconidae	Microgastrinae	Apanteles		BOLD:ACY6198
Insecta	Hymenoptera	Braconidae	Microgastrinae	Choeras		BOLD:AAH1208
Insecta	Hymenoptera	Braconidae	Microgastrinae	Choeras		BOLD:ABY9416
Insecta	Hymenoptera	Braconidae	Microgastrinae	Cotesia		BOLD:ABX9989
Insecta	Hymenoptera	Braconidae	Microgastrinae	Cotesia		BOLD:ACJ7764
Insecta	Hymenoptera	Braconidae	Microgastrinae	Cotesia		BOLD:ACM0253
Insecta	Hymenoptera	Braconidae	Microgastrinae	Cotesia		BOLD:ACM8078
Insecta	Hymenoptera	Braconidae	Microgastrinae	Cotesia		BOLD:ACO0597
Insecta	Hymenoptera	Braconidae	Microgastrinae	Cotesia		BOLD:ACQ1835
Insecta	Hymenoptera	Braconidae	Microgastrinae	Cotesia		BOLD:ACR0081
Insecta	Hymenoptera	Braconidae	Microgastrinae	Cotesia		BOLD:ACU3997
Insecta	Hymenoptera	Braconidae	Microgastrinae	Cotesia		BOLD:ADG1675
Insecta	Hymenoptera	Braconidae	Microgastrinae	Dolichogenidea		BOLD:AAV2119
Insecta	Hymenoptera	Braconidae	Microgastrinae	Dolichogenidea		BOLD:ACU9114
Insecta	Hymenoptera	Braconidae	Microgastrinae	Dolichogenidea		BOLD:ACV1865
Insecta	Hymenoptera	Braconidae	Microgastrinae	Glyptapanteles		BOLD:ACU8858
Insecta	Hymenoptera	Braconidae	Microgastrinae	Glyptapanteles		BOLD:ADU3887
Insecta	Hymenoptera	Braconidae	Microgastrinae	Microgaster		BOLD:ACT8750
Insecta	Hymenoptera	Braconidae	Microgastrinae	Microgaster		BOLD:ADC1752
Insecta	Hymenoptera	Braconidae	Microgastrinae	Microgaster		BOLD:ADE2776
Insecta	Hymenoptera	Braconidae	Microgastrinae	Microplitis		BOLD:AAV2098
Insecta	Hymenoptera	Braconidae	Microgastrinae	Microplitis		BOLD:AAV2121
Insecta	Hymenoptera	Braconidae	Microgastrinae	Microplitis		BOLD:ABZ6858
Insecta	Hymenoptera	Braconidae	Microgastrinae	Microplitis		BOLD:ADF9545
Insecta	Hymenoptera	Braconidae	Microgastrinae	Parapanteles		BOLD:AAH1240
Insecta	Hymenoptera	Braconidae	Microgastrinae	Parapanteles		BOLD:AAH1325
Insecta	Hymenoptera	Braconidae	Microgastrinae	Parapanteles		BOLD:ADL9610
Insecta	Hymenoptera	Braconidae	Microgastrinae	Protapanteles		BOLD:AAM7218
Insecta	Hymenoptera	Braconidae	Microgastrinae	Snellenius		BOLD:AAV2095
Insecta	Hymenoptera	Braconidae	Microgastrinae	Snellenius, Microplitis		BOLD:ABZ6859
Insecta	Hymenoptera	Braconidae	Microgastrinae			BOLD:AAH1082
Insecta	Hymenoptera	Braconidae	Microgastrinae			BOLD:ABZ6908
Insecta	Hymenoptera	Braconidae	Microgastrinae			BOLD:ACM9840
Insecta	Hymenoptera	Braconidae	Microgastrinae			BOLD:ACZ8250
Insecta	Hymenoptera	Braconidae	Microgastrinae			BOLD:ADB8991
Insecta	Hymenoptera	Braconidae	Microgastrinae			BOLD:ADF3561
Insecta	Hymenoptera	Braconidae	Microgastrinae			BOLD:ADF4293
Insecta	Hymenoptera	Braconidae	Microgastrinae			BOLD:ADF8779
Insecta	Hymenoptera	Braconidae	Opiinae	Opius		BOLD:ACQ9321
Insecta	Hymenoptera	Braconidae	Opiinae	Opius		BOLD:ADC1434
Insecta	Hymenoptera	Braconidae	Opiinae			BOLD:ACP1151
Insecta	Hymenoptera	Braconidae	Opiinae			BOLD:ACR3054
Insecta	Hymenoptera	Braconidae	Opiinae			BOLD:ADG1814
Insecta	Hymenoptera	Braconidae	Opiinae			BOLD:ADV0663
Insecta	Hymenoptera	Braconidae				BOLD:ADH9106
Insecta	Hymenoptera	Braconidae				BOLD:ADS2438
Insecta	Hymenoptera	Braconidae				BOLD:ADS9741
Insecta	Hymenoptera	Braconidae				BOLD:ADT7213
Insecta	Hymenoptera	Braconidae				BOLD:ADV1061
Insecta	Hymenoptera	Braconidae				BOLD:AEA8811
Insecta	Hymenoptera	Ceraphronidae				BOLD:ABX8198
Insecta	Hymenoptera	Chalcididae				BOLD:ABV5018
Insecta	Hymenoptera	Chrysididae	Chrysidinae	Chrysis		BOLD:AAV6055
Insecta	Hymenoptera	Chrysididae				BOLD:ACZ6495
Insecta	Hymenoptera	Colletidae	Hylaeinae	Hylaeus		BOLD:ACN7111
Insecta	Hymenoptera	Colletidae	Hylaeinae	Hylaeus		BOLD:ACV3695
Insecta	Hymenoptera	Colletidae	Hylaeinae	Hylaeus		BOLD:ACZ5460
Insecta	Hymenoptera	Crabronidae	Crabroninae	Dasyproctus		BOLD:ACV2425
Insecta	Hymenoptera	Crabronidae	Crabroninae	Larra		BOLD:AAQ3017
Insecta	Hymenoptera	Crabronidae	Crabroninae	Rhopalum		BOLD:ADI0790
Insecta	Hymenoptera	Crabronidae		Liris		BOLD:ACB7723
Insecta	Hymenoptera	Crabronidae		Liris		BOLD:ACZ4498
Insecta	Hymenoptera	Crabronidae		Liris		BOLD:ACZ4499
Insecta	Hymenoptera	Crabronidae		Liris		BOLD:ADV6782
Insecta	Hymenoptera	Crabronidae		Tachysphex		BOLD:ADP0402
Insecta	Hymenoptera	Crabronidae				BOLD:ACW1842
Insecta	Hymenoptera	Crabronidae				BOLD:ACW2838
Insecta	Hymenoptera	Crabronidae				BOLD:ACY5442
Insecta	Hymenoptera	Crabronidae				BOLD:ACY6226
Insecta	Hymenoptera	Crabronidae				BOLD:ADG0719
Insecta	Hymenoptera	Diapriidae	Diapriinae	Trichopria		BOLD:ACK0109
Insecta	Hymenoptera	Diapriidae	Diapriinae	Trichopria		BOLD:ADS2889
Insecta	Hymenoptera	Diapriidae				BOLD:ACO9218
Insecta	Hymenoptera	Diapriidae				BOLD:ADW2125
Insecta	Hymenoptera	Dryinidae	Anteoninae	Anteon		BOLD:ADU0412
Insecta	Hymenoptera	Dryinidae				BOLD:ADU1837
Insecta	Hymenoptera	Dryinidae				BOLD:ADU8340
Insecta	Hymenoptera	Dryinidae				BOLD:ADV0793
Insecta	Hymenoptera	Dryinidae				BOLD:ADV3613
Insecta	Hymenoptera	Dryinidae				BOLD:ADV6258
Insecta	Hymenoptera	Encyrtidae	Encyrtinae	Copidosoma		BOLD:ADU5749
Insecta	Hymenoptera	Eulophidae				BOLD:ACZ5612
Insecta	Hymenoptera	Eulophidae				BOLD:ADU4271
Insecta	Hymenoptera	Figitidae				BOLD:ACO3305
Insecta	Hymenoptera	Formicidae				BOLD:ACO6263
Insecta	Hymenoptera	Formicidae				BOLD:ADB3840
Insecta	Hymenoptera	Halictidae	Halictinae	Lasioglossum		BOLD:ACV4415
Insecta	Hymenoptera	Halictidae	Halictinae	Sphecodes		BOLD:ADU7116
Insecta	Hymenoptera	Halictidae	Nomiinae	Nomia		BOLD:ACV4299
Insecta	Hymenoptera	Halictidae				BOLD:ADS7267
Insecta	Hymenoptera	Halictidae				BOLD:ADT1634
Insecta	Hymenoptera	Ichneumonidae	Banchinae			BOLD:ABY2326
Insecta	Hymenoptera	Ichneumonidae	Campopleginae	Campoplex		BOLD:ADC1109
Insecta	Hymenoptera	Ichneumonidae	Campopleginae	Casinaria		BOLD:ADJ5656
Insecta	Hymenoptera	Ichneumonidae	Campopleginae	Cymodusa		BOLD:ACD4925
Insecta	Hymenoptera	Ichneumonidae	Campopleginae	Hyposoter		BOLD:AAV4398
Insecta	Hymenoptera	Ichneumonidae	Campopleginae			BOLD:AAQ3087
Insecta	Hymenoptera	Ichneumonidae	Campopleginae			BOLD:ABA5980
Insecta	Hymenoptera	Ichneumonidae	Campopleginae			BOLD:ABW3359
Insecta	Hymenoptera	Ichneumonidae	Campopleginae			BOLD:ACD4926
Insecta	Hymenoptera	Ichneumonidae	Campopleginae			BOLD:ACJ3243
Insecta	Hymenoptera	Ichneumonidae	Cremastinae	Pristomerus		BOLD:ACN6161
Insecta	Hymenoptera	Ichneumonidae	Cremastinae	Pristomerus		BOLD:ADV2562
Insecta	Hymenoptera	Ichneumonidae	Cremastinae			BOLD:ACD9426
Insecta	Hymenoptera	Ichneumonidae	Cryptinae			BOLD:ABX2023
Insecta	Hymenoptera	Ichneumonidae	Cryptinae			BOLD:ACA3051
Insecta	Hymenoptera	Ichneumonidae	Cryptinae			BOLD:ACP4649
Insecta	Hymenoptera	Ichneumonidae	Cryptinae			BOLD:ADK8846
Insecta	Hymenoptera	Ichneumonidae	Cryptinae			BOLD:ADU6928
Insecta	Hymenoptera	Ichneumonidae	Ichneumoninae			BOLD:AAQ0502
Insecta	Hymenoptera	Ichneumonidae	Ichneumoninae			BOLD:ADT4715
Insecta	Hymenoptera	Ichneumonidae	Mesochorinae	Mesochorus		BOLD:ACG6063
Insecta	Hymenoptera	Ichneumonidae	Mesochorinae			BOLD:ACA3165
Insecta	Hymenoptera	Ichneumonidae	Metopiinae	Triclistus		BOLD:ACW9707
Insecta	Hymenoptera	Ichneumonidae	Metopiinae			BOLD:AAQ3056
Insecta	Hymenoptera	Ichneumonidae	Ophioninae	Enicospilus		BOLD:AAH2022
Insecta	Hymenoptera	Ichneumonidae	Ophioninae	Enicospilus		BOLD:AAI5163
Insecta	Hymenoptera	Ichneumonidae	Ophioninae	Enicospilus		BOLD:ACA6188
Insecta	Hymenoptera	Ichneumonidae	Ophioninae	Enicospilus		BOLD:ACB8257
Insecta	Hymenoptera	Ichneumonidae	Orthocentrinae			BOLD:ACO7749
Insecta	Hymenoptera	Ichneumonidae	Orthocentrinae			BOLD:ACO7901
Insecta	Hymenoptera	Ichneumonidae	Pimplinae	Lissopimpla, Echthromorpha		BOLD:AAH1996
Insecta	Hymenoptera	Ichneumonidae	Pimplinae	Pimpla		BOLD:ACO5028
Insecta	Hymenoptera	Ichneumonidae	Pimplinae	Xanthopimpla		BOLD:ACI8048
Insecta	Hymenoptera	Ichneumonidae	Tryphoninae	Netelia		BOLD:ACA6138
Insecta	Hymenoptera	Ichneumonidae				BOLD:AAH1839
Insecta	Hymenoptera	Ichneumonidae				BOLD:AAY6917
Insecta	Hymenoptera	Ichneumonidae				BOLD:ABX2028
Insecta	Hymenoptera	Ichneumonidae				BOLD:ACC4985
Insecta	Hymenoptera	Ichneumonidae				BOLD:ACN4406
Insecta	Hymenoptera	Ichneumonidae				BOLD:ACO1143
Insecta	Hymenoptera	Ichneumonidae				BOLD:ACO3293
Insecta	Hymenoptera	Ichneumonidae				BOLD:ACO6522
Insecta	Hymenoptera	Ichneumonidae				BOLD:ACO6866
Insecta	Hymenoptera	Ichneumonidae				BOLD:ACO7126
Insecta	Hymenoptera	Ichneumonidae				BOLD:ACO8435
Insecta	Hymenoptera	Ichneumonidae				BOLD:ACP4293
Insecta	Hymenoptera	Ichneumonidae				BOLD:ACR0035
Insecta	Hymenoptera	Ichneumonidae				BOLD:ACR7369
Insecta	Hymenoptera	Ichneumonidae				BOLD:ACS4476
Insecta	Hymenoptera	Ichneumonidae				BOLD:ACU8235
Insecta	Hymenoptera	Ichneumonidae				BOLD:ACV0540
Insecta	Hymenoptera	Ichneumonidae				BOLD:ACW8437
Insecta	Hymenoptera	Ichneumonidae				BOLD:ACX0130
Insecta	Hymenoptera	Ichneumonidae				BOLD:ACZ2753
Insecta	Hymenoptera	Ichneumonidae				BOLD:ACZ2805
Insecta	Hymenoptera	Ichneumonidae				BOLD:ACZ5784
Insecta	Hymenoptera	Ichneumonidae				BOLD:ADC1388
Insecta	Hymenoptera	Ichneumonidae				BOLD:ADC1971
Insecta	Hymenoptera	Ichneumonidae				BOLD:ADC2373
Insecta	Hymenoptera	Ichneumonidae				BOLD:ADF8987
Insecta	Hymenoptera	Ichneumonidae				BOLD:ADF9963
Insecta	Hymenoptera	Ichneumonidae				BOLD:ADG3706
Insecta	Hymenoptera	Ichneumonidae				BOLD:ADJ6316
Insecta	Hymenoptera	Ichneumonidae				BOLD:ADJ8916
Insecta	Hymenoptera	Ichneumonidae				BOLD:ADS5665
Insecta	Hymenoptera	Ichneumonidae				BOLD:ADT8256
Insecta	Hymenoptera	Ichneumonidae				BOLD:ADU3003
Insecta	Hymenoptera	Ichneumonidae				BOLD:ADU3004
Insecta	Hymenoptera	Ichneumonidae				BOLD:ADU8173
Insecta	Hymenoptera	Ichneumonidae				BOLD:ADV3316
Insecta	Hymenoptera	Ichneumonidae				BOLD:ADV7048
Insecta	Hymenoptera	Ichneumonidae				BOLD:ADV8261
Insecta	Hymenoptera	Ichneumonidae				BOLD:AEC2271
Insecta	Hymenoptera	Megachilidae	Megachilinae	Megachile		BOLD:ACV4377
Insecta	Hymenoptera	Megaspilidae				BOLD:ACK1376
Insecta	Hymenoptera	Megaspilidae				BOLD:ADW4082
Insecta	Hymenoptera	Philanthidae	Philanthinae	Cerceris		BOLD:ACP9123
Insecta	Hymenoptera	Philanthidae	Philanthinae	Cerceris		BOLD:AEB7381
Insecta	Hymenoptera	Platygastridae	Scelioninae			BOLD:ABX2056
Insecta	Hymenoptera	Platygastridae	Scelioninae			BOLD:ABX9762
Insecta	Hymenoptera	Platygastridae	Scelioninae			BOLD:ACE0339
Insecta	Hymenoptera	Platygastridae				BOLD:ACM7158
Insecta	Hymenoptera	Platygastridae				BOLD:ACN6970
Insecta	Hymenoptera	Platygastridae				BOLD:ACO0647
Insecta	Hymenoptera	Platygastridae				BOLD:ACO5194
Insecta	Hymenoptera	Platygastridae				BOLD:ACO7414
Insecta	Hymenoptera	Platygastridae				BOLD:ACO8749
Insecta	Hymenoptera	Platygastridae				BOLD:ACV0154
Insecta	Hymenoptera	Platygastridae				BOLD:ACV2024
Insecta	Hymenoptera	Platygastridae				BOLD:ACV5387
Insecta	Hymenoptera	Platygastridae				BOLD:ACV5684
Insecta	Hymenoptera	Platygastridae				BOLD:ACW2509
Insecta	Hymenoptera	Platygastridae				BOLD:ACW5032
Insecta	Hymenoptera	Platygastridae				BOLD:ACW6732
Insecta	Hymenoptera	Platygastridae				BOLD:ACX7307
Insecta	Hymenoptera	Platygastridae				BOLD:ACX8848
Insecta	Hymenoptera	Platygastridae				BOLD:ACY2826
Insecta	Hymenoptera	Platygastridae				BOLD:ACY5057
Insecta	Hymenoptera	Platygastridae				BOLD:ADE2037
Insecta	Hymenoptera	Platygastridae				BOLD:ADG2142
Insecta	Hymenoptera	Platygastridae				BOLD:ADI6960
Insecta	Hymenoptera	Platygastridae				BOLD:ADS0700
Insecta	Hymenoptera	Platygastridae				BOLD:ADT1946
Insecta	Hymenoptera	Platygastridae				BOLD:ADV2518
Insecta	Hymenoptera	Pompilidae	Pompilinae	Anoplius		BOLD:ACN6361
Insecta	Hymenoptera	Pompilidae	Pompilinae	Episyron		BOLD:ADP4626
Insecta	Hymenoptera	Pompilidae				BOLD:ACU3405
Insecta	Hymenoptera	Pompilidae				BOLD:ACZ1713
Insecta	Hymenoptera	Pompilidae				BOLD:ACZ1942
Insecta	Hymenoptera	Pompilidae				BOLD:ACZ5681
Insecta	Hymenoptera	Pompilidae				BOLD:ADD2507
Insecta	Hymenoptera	Psenidae		Psenulus		BOLD:ACO6848
Insecta	Hymenoptera	Pteromalidae	Pteromalinae	Pteromalus		BOLD:ACA5069
Insecta	Hymenoptera	Pteromalidae				BOLD:ADU7320
Insecta	Hymenoptera	Sphecidae	Ammophilinae	Podalonia		BOLD:ACP9050
Insecta	Hymenoptera	Sphecidae	Sceliphrinae	Chalybion		BOLD:ACP0087
Insecta	Hymenoptera	Sphecidae	Sceliphrinae	Sceliphron		BOLD:ACO9251
Insecta	Hymenoptera	Tiphiidae				BOLD:ADU3378
Insecta	Hymenoptera	Trichogrammatidae				BOLD:ADV6530
Insecta	Hymenoptera	Vespidae				BOLD:ADT8876
Insecta	Hymenoptera					BOLD:ACD4951
Insecta	Hymenoptera					BOLD:ACD7821
Insecta	Hymenoptera					BOLD:ACD8134
Insecta	Hymenoptera					BOLD:ACV4586
Insecta	Hymenoptera					BOLD:ACZ2211
Insecta	Hymenoptera					BOLD:ADA7388
Insecta	Hymenoptera					BOLD:ADC1173
Insecta	Hymenoptera					BOLD:ADH3756
Insecta	Hymenoptera					BOLD:ADH4791
Insecta	Hymenoptera					BOLD:ADH6281
Insecta	Hymenoptera					BOLD:ADJ1553
Insecta	Hymenoptera					BOLD:ADJ2291
Insecta	Hymenoptera					BOLD:ADJ5366
Insecta	Hymenoptera					BOLD:ADS2923
Insecta	Hymenoptera					BOLD:ADS3550
Insecta	Hymenoptera					BOLD:ADV0755
Insecta	Hymenoptera					BOLD:ADV3898
Insecta	Lepidoptera	Riodinidae	Riodininae	Abisara	Abisara echerius	BOLD:ADR9862	Pest/pollinator
Insecta	Lepidoptera	Noctuidae	Condicinae	Hadjina, Acosmetia	Acosmetia chinensis, Acosmetia biguttula	BOLD:AAG5874	Pest/pollinator
Insecta	Lepidoptera	Noctuidae	Acronictinae	Acronicta	Acronicta rumicis, Acronicta sp.	BOLD:AAC2556	Pest/pollinator
Insecta	Lepidoptera	Tortricidae	Tortricinae	Adoxophyes	Adoxophyes dubia, Adoxophyes honmai	BOLD:AAJ1828	Pest/pollinator
Insecta	Lepidoptera	Tortricidae	Tortricinae	Adoxophyes	Adoxophyes fasciculana, Adoxophyes orana, Adoxophyes privatana	BOLD:ABY6932	Pest/pollinator
Insecta	Lepidoptera	Tortricidae	Tortricinae	Adoxophyes	Adoxophyes orana, Adoxophyes sp. SC-2011, Adoxophyes sp. XL-2015	BOLD:ABA2177	Pest/pollinator
Insecta	Lepidoptera	Tortricidae	Tortricinae	Adoxophyes	Adoxophyes privatana, Adoxophyes cyrtosema, Adoxophyes fasciculana	BOLD:ABA2158	Pest/pollinator
Insecta	Lepidoptera	Erebidae	Herminiinae	Adrapsa	Adrapsa ablualis	BOLD:AAB9667	Pest/pollinator
Insecta	Lepidoptera	Noctuidae	Aediinae	Aedia	Aedia acronyctiodes	BOLD:AAC1282	Pest/pollinator
Insecta	Lepidoptera	Noctuidae	Aediinae	Aedia	Aedia leucomelas	BOLD:AAC1283	Pest/pollinator
Insecta	Lepidoptera	Crambidae	Spilomelinae	Aethaloessa	Aethaloessa calidalis	BOLD:AAG0546	Pest/pollinator
Insecta	Lepidoptera	Geometridae	Larentiinae	Agnibesa		BOLD:AAN0104
Insecta	Lepidoptera	Noctuidae	Noctuinae	Agrotis	Agrotis ipsilon	BOLD:AAA3364	Pest/pollinator
Insecta	Lepidoptera	Noctuidae	Noctuinae	Agrotis	Agrotis ipsilon	BOLD:ADF7804	Pest/pollinator
Insecta	Lepidoptera	Cosmopterigidae	Cosmopteriginae	Anatrachyntis	Anatrachyntis japonica	BOLD:AAR3734	Pest/pollinator
Insecta	Lepidoptera	Tortricidae	Olethreutinae	Ancylis	Ancylis comptana	BOLD:ABX5131	Pest/pollinator
Insecta	Lepidoptera	Tortricidae	Olethreutinae	Ancylis	Ancylis comptana	BOLD:ADI5033	Pest/pollinator
Insecta	Lepidoptera	Erebidae	Scoliopteryginae	Anomis	Anomis auragoides, Anomis flava, Anomis lyona	BOLD:AAC7805	Pest/pollinator
Insecta	Lepidoptera	Erebidae	Scoliopteryginae	Gonitis, Anomis	Anomis mesogona, Gonitis mesogona	BOLD:ABY3714	Pest/pollinator
Insecta	Lepidoptera	Erebidae	Eulepidotinae, Catocalinae	Anticarsia	Anticarsia irrorata	BOLD:AAF1691	Pest/pollinator
Insecta	Lepidoptera	Crambidae	Spilomelinae	Antigastra	Antigastra catalaunalis	BOLD:AAE6976	Pest/pollinator
Insecta	Lepidoptera	Noctuidae	Noctuinae	Apamea	Apamea xylodes	BOLD:AAF7818	Pest/pollinator
Insecta	Lepidoptera	Nymphalidae	Biblidinae	Ariadne	Ariadne ariadne	BOLD:ACX4062	Pest/pollinator
Insecta	Lepidoptera	Lycaenidae	Theclinae	Artipe	Artipe eryx	BOLD:AAK0208	Pest/pollinator
Insecta	Lepidoptera	Geometridae	Ennominae	Cleora, Ascotis	Ascotis dianaria, Cleora AH01Ch, Ascotis selenaria	BOLD:AAC0403	Pest/pollinator
Insecta	Lepidoptera	Crambidae	Spilomelinae	Ategumia	Ategumia adipalis	BOLD:AAD2705	Pest/pollinator
Insecta	Lepidoptera	Noctuidae	Noctuinae	Athetis	Athetis lepigone	BOLD:AAG5938	Pest/pollinator
Insecta	Lepidoptera	Noctuidae	Noctuinae	Athetis	Athetis lepigone	BOLD:ADK3507	Pest/pollinator
Insecta	Lepidoptera	Noctuidae	Noctuinae	Athetis	Athetis reclusa	BOLD:AAQ0233	Pest/pollinator
Insecta	Lepidoptera	Noctuidae	Noctuinae	Athetis	Athetis reclusa	BOLD:ADH5386	Pest/pollinator
Insecta	Lepidoptera	Nymphalidae	Limenitidinae	Limenitis, Athyma	Athyma sulpitia, Limenitis sulpitia	BOLD:AAJ2607	Pest/pollinator
Insecta	Lepidoptera	Lecithoceridae	Torodorinae	Athymoris	Athymoris martialis	BOLD:AAJ9552	Pest/pollinator
Insecta	Lepidoptera	Psychidae	Psychinae	Bacotia	Bacotia sakabei	BOLD:ADJ6715	Pest/pollinator
Insecta	Lepidoptera	Tortricidae	Olethreutinae	Bactra	Bactra scalopias, Bactra ablabes, Bactra optanias	BOLD:AAT9996	Pest/pollinator
Insecta	Lepidoptera	Geometridae	Geometrinae	Berta	Berta albiplaga	BOLD:AAC7686	Pest/pollinator
Insecta	Lepidoptera	Erebidae	Herminiinae	Bleptina		BOLD:AAA9240
Insecta	Lepidoptera	Crambidae	Spilomelinae	Bocchoris	Bocchoris inspersalis, Bocchoris cf. inspersalis	BOLD:AAC5466	Pest/pollinator
Insecta	Lepidoptera	Crambidae	Spilomelinae	Bradina	Bradina admixtalis	BOLD:AAC9320	Pest/pollinator
Insecta	Lepidoptera	Crambidae	Spilomelinae	Bradina	Bradina melanoperas	BOLD:AAE8009	Pest/pollinator
Insecta	Lepidoptera	Erebidae	Arctiinae	Brunia, Eilema	Brunia sarawaca, Eilema AH03Th, Eilema AH10Th, Eilema AH05Th, Brunia antica, Eilema antica	BOLD:AAH2624	Pest/pollinator
Insecta	Lepidoptera	Gracillariidae	Gracillariinae	Caloptilia	Caloptilia theivora	BOLD:ADD1138	Pest/pollinator
Insecta	Lepidoptera	Crambidae	Spilomelinae	Camptomastix		BOLD:AAL5910
Insecta	Lepidoptera	Noctuidae, Erebidae	Noctuinae	Caradrina	Caradrina morosa	BOLD:ABY3487	Pest/pollinator
Insecta	Lepidoptera	Geometridae	Ennominae	Chiasmia	Chiasmia hebesata	BOLD:AAC1425	Pest/pollinator
Insecta	Lepidoptera	Geometridae	Ennominae	Chiasmia		BOLD:ABX1210
Insecta	Lepidoptera	Lycaenidae	Polyommatinae	Chilades, Luthrodes	Chilades pandava, Luthrodes pandava	BOLD:AAJ4577	Pest/pollinator
Insecta	Lepidoptera	Crambidae	Crambinae	Chilo	Chilo suppressalis	BOLD:AAB0666	Pest/pollinator
Insecta	Lepidoptera	Tortricidae	Tortricinae	Choristoneura, Homona	Choristoneura luticostana, Homona coffearia, Homona superbana, Choristoneura diversana, Homona magnanima	BOLD:ABA2240	Pest/pollinator
Insecta	Lepidoptera	Noctuidae	Plusiinae	Chrysodeixis	Chrysodeixis chalcites, Chrysodeixis acuta, Chrysodeixis eriosoma	BOLD:AAB3384	Pest/pollinator
Insecta	Lepidoptera	Noctuidae	Plusiinae	Plusia, Chrysodeixis	Chrysodeixis chalcites, Chrysodeixis acuta, Chrysodeixis illuminata, Chrysodeixis eriosoma, Plusia acuta	BOLD:AAB3385	Pest/pollinator
Insecta	Lepidoptera	Geometridae	Ennominae	Cleora	Cleora repulsaria	BOLD:ACT0335	Pest/pollinator
Insecta	Lepidoptera	Pyralidae, Crambidae	Spilomelinae	Cnaphalocrocis, Mecyna	Cnaphalocrocis cf. medinalis, Cnaphalocrocis medinalis, Mecyna tricolor	BOLD:AAA4901	Pest/pollinator
Insecta	Lepidoptera	Crambidae	Spilomelinae, Pyraustinae	Cnaphalocrocis, Marasmia	Cnaphalocrocis poeyalis, Marasmia poeyalis	BOLD:AAC4723	Pest/pollinator
Insecta	Lepidoptera	Pieridae	Coliadinae	Colias	Colias croceus, Colias croacia, Colias marnoana, Colias erate, Colias crocea, Colias poliographus, Colias nilagiriensis, Colias alfacariensis, Colias libanotica, Colias hyale	BOLD:ABZ3039	Pest/pollinator
Insecta	Lepidoptera	Noctuidae	Condicinae	Perigea, Condica	Condica capensis, Perigea conducta, Condica illecta, Condica aroana	BOLD:ABZ3194	Pest/pollinator
Insecta	Lepidoptera	Noctuidae	Condicinae	Condica	Condica illecta	BOLD:AAB2411	Pest/pollinator
Insecta	Lepidoptera	Noctuidae	Condicinae	Condica	Condica Janzen17, Condica albigera	BOLD:AAD8636	Pest/pollinator
Insecta	Lepidoptera	Noctuidae	Condicinae	Condica	Condica viscosa	BOLD:AAN1812	Pest/pollinator
Insecta	Lepidoptera	Erebidae	Arctiinae	Creatonotos	Creatonotos sp., Creatonotos transiens	BOLD:AAE9516	Pest/pollinator
Insecta	Lepidoptera	Crambidae	Pyraustinae	Crypsiptya	Crypsiptya coclesalis	BOLD:AAE4215	Pest/pollinator
Insecta	Lepidoptera	Pyralidae	Phycitinae	Cryptoblabes	Cryptoblabes adoceta	BOLD:AAD8019	Pest/pollinator
Insecta	Lepidoptera	Noctuidae	Plusiinae	Ctenoplusia	Ctenoplusia agnata	BOLD:ADC8369	Pest/pollinator
Insecta	Lepidoptera	Noctuidae	Plusiinae	Ctenoplusia	Ctenoplusia albostriata	BOLD:AAD6357	Pest/pollinator
Insecta	Lepidoptera	Erebidae	Arctiinae	Danielithosia	Danielithosia hoenei	BOLD:ACD8663	Pest/pollinator
Insecta	Lepidoptera	Noctuidae	Noctuinae	Dasygaster1	Dasygaster melambaphes	BOLD:AAO2991	Pest/pollinator
Insecta	Lepidoptera	Crambidae	Spilomelinae, Rivulinae	Diaphania, Oglasa	Diaphania indica, Diaphania nr. indica, Oglasa consanguis	BOLD:AAB1719	Pest/pollinator
Insecta	Lepidoptera	Crambidae	Spilomelinae	Mecyna, Diasemia	Diasemia accalis, Mecyna tricolor	BOLD:AAC4399	Pest/pollinator
Insecta	Lepidoptera	Erebidae	Boletobiinae	Diomea	Diomea cremata	BOLD:ACP3078	Pest/pollinator
Insecta	Lepidoptera	Tortricidae	Olethreutinae	Dudua	Dudua sp., Dudua siderea, Dudua charadraea, Dudua aprobola	BOLD:AAT1455	Pest/pollinator
Insecta	Lepidoptera	Erebidae	Erebinae	Dysgonia	Dysgonia mandschuriana, Dysgonia arctotaenia	BOLD:ADM8094	Pest/pollinator
Insecta	Lepidoptera	Geometridae	Ennominae	Ectropis	Ectropis arizanensis, Ectropis excellens, Ectropis obliqua	BOLD:AAI9331	Pest/pollinator
Insecta	Lepidoptera	Elachistidae	Elachistinae	Elachista	Elachista exactella, Elachista baltica, Elachista freyerella, Elachista nr. freyerella	BOLD:AAD9985	Pest/pollinator
Insecta	Lepidoptera	Nymphalidae	Satyrinae, Danainae, Biblidinae	Ariadne, Elymnias, Tirumala	Elymnias hypermnestra, Ariadne ariadne, Tirumala septentrionis	BOLD:AAN4008	Pest/pollinator
Insecta	Lepidoptera	Hepialidae		Endoclita	Endoclita signifer, Endoclita sinensis	BOLD:ABV4193	Pest/pollinator
Insecta	Lepidoptera	Pyralidae	Pyralinae	Endotricha	Endotricha portialis	BOLD:ABY9049	Pest/pollinator
Insecta	Lepidoptera	Sesiidae	Tinthiinae	Entrichella	Entrichella constricta	BOLD:ABX8284	Pest/pollinator
Insecta	Lepidoptera	Sesiidae	Tinthiinae	Entrichella	Entrichella trifasciata	BOLD:ABX4477	Pest/pollinator
Insecta	Lepidoptera	Erebidae	Erebinae	Ericeia	Ericeia epitheca	BOLD:AAB2465	Pest/pollinator
Insecta	Lepidoptera	Erebidae	Erebinae	Ericeia	Ericeia inangulata	BOLD:AAL4530	Pest/pollinator
Insecta	Lepidoptera	Erebidae, Noctuidae	Erebinae	Ericeia	Ericeia korintjiensis	BOLD:AAG5994	Pest/pollinator
Insecta	Lepidoptera	Erebidae	Erebinae	Ericeia	Ericeia subcinerea	BOLD:AAZ4774	Pest/pollinator
Insecta	Lepidoptera	Erebidae	Boletobiinae	Eublemma	Eublemma anachoresis, Eublemma accedens	BOLD:AAB5648	Pest/pollinator
Insecta	Lepidoptera	Erebidae	Boletobiinae	Eublemma	Eublemma cochylioides	BOLD:AAB6501	Pest/pollinator
Insecta	Lepidoptera	Lycaenidae	Polyommatinae	Euchrysops	Euchrysops cnejus	BOLD:AAD0845	Pest/pollinator
Insecta	Lepidoptera	Limacodidae, Erebidae	Lymantriinae, Limacodinae	Neothosea, Euproctis, Somena	Euproctis scintillans, Somena scintillans, Euproctis pulverea, Neothosea suigensis	BOLD:AAG6231	Pest/pollinator
Insecta	Lepidoptera	Pieridae	Coliadinae	Eurema	Eurema ada insosinica, Eurema mandarina, Eurema brigitta, Eurema hecabe, Eurema alitha, Eurema lacteola, Eurema andersoni, Eurema blanda, Eurema andersonii, Eurema ada	BOLD:AAA6082	Pest/pollinator
Insecta	Lepidoptera	Pieridae	Coliadinae	Eurema	Eurema hecabe	BOLD:ADC7597	Pest/pollinator
Insecta	Lepidoptera	Noctuidae	Noctuinae	Spodoptera, Euxoa	Euxoa pareruta, Spodoptera cilium	BOLD:AAC8279	Pest/pollinator
Insecta	Lepidoptera	Pterophoridae	Pterophorinae	Exelastis	Exelastis pumilio	BOLD:AAD4253	Pest/pollinator
Insecta	Lepidoptera	Geometridae	Ennominae	Fascellina	Fascellina plagiataAH01Bu, Fascellina plagiata, Fascellina plagiataAH01Ch	BOLD:AAE6604	Pest/pollinator
Insecta	Lepidoptera	Noctuidae	Noctuinae	Lacinipolia, Feliniopsis	Feliniopsis confundens	BOLD:ACV2039	Pest/pollinator
Insecta	Lepidoptera	Nolidae	Eligminae	Gadirtha	Gadirtha fusca	BOLD:ADR3490	Pest/pollinator
Insecta	Lepidoptera	Eupterotidae		Ganisa	Ganisa plana, Ganisa similis	BOLD:AAU2718	Pest/pollinator
Insecta	Lepidoptera	Crambidae	Spilomelinae	Glycythyma	Glycythyma chrysorycta	BOLD:AAE3792	Pest/pollinator
Insecta	Lepidoptera	Erebidae	Erebinae	Mocis, Grammodes	Grammodes geometrica, Mocis ancilla, Grammodes stolida	BOLD:AAZ9061	Pest/pollinator
Insecta	Lepidoptera	Tortricidae	Olethreutinae	Grapholita	Grapholita molesta	BOLD:AAB0523	Pest/pollinator
Insecta	Lepidoptera	Tortricidae	Tortricinae	Cochylis, Gynnidomorpha	Gynnidomorpha permixtana, Gynnidomorpha romonana, Gynnidomorpha minimana, Cochylis sp. 1	BOLD:AAA3058	Pest/pollinator
Insecta	Lepidoptera	Gelechiidae	Dichomeridinae	Helcystogramma	Helcystogramma sp. ABX8999, Helcystogramma macroscopa	BOLD:ABX8999	Pest/pollinator
Insecta	Lepidoptera	Noctuidae	Heliothinae	Helicoverpa	Helicoverpa armigera, Helicoverpa sp. Roraima01, Helicoverpa assulta, Helicoverpa sp., Helicoverpa sp. Piaui01, Helicoverpa sp. Bahia01	BOLD:AAA5223	Pest/pollinator
Insecta	Lepidoptera	Erebidae	Herminiinae	Herminia	Herminia grisealis	BOLD:ADK5872	Pest/pollinator
Insecta	Lepidoptera	Crambidae	Spilomelinae	Herpetogramma	Herpetogramma licarsisalis	BOLD:AAA3965	Pest/pollinator
Insecta	Lepidoptera	Erebidae	Herminiinae	Bertula, Hipoepa	Hipoepa fractalis, Bertula bistrigata	BOLD:ABY4999	Pest/pollinator
Insecta	Lepidoptera	Sphingidae	Macroglossinae	Hippotion	Hippotion echeclus, Hippotion rosetta	BOLD:ABZ6316	Pest/pollinator
Insecta	Lepidoptera	Sphingidae	Macroglossinae	Hippotion	Hippotion rafflesii, Hippotion rosetta, Hippotion boerhaviae	BOLD:AAB4653	Pest/pollinator
Insecta	Lepidoptera	Erebidae	Herminiinae	Hydrillodes	Hydrillodes dimissalis	BOLD:AAD1155	Pest/pollinator
Insecta	Lepidoptera	Erebidae	Calpinae, Noctuinae, Herminiinae	Caradrina, Hydrillodes	Hydrillodes metisalis, Hydrillodes sp. 3, Hydrillodes sp., Caradrina morosa, Hydrillodes sp. NSMK IN2018001600, Hydrillodes sp. NSMK IN2018001599, Hydrillodes metisalis PS1, Hydrillodes lentalis	BOLD:AAE1851	Pest/pollinator
Insecta	Lepidoptera	Erebidae	Herminiinae	Hydrillodes		BOLD:ACB1132
Insecta	Lepidoptera	Erebidae	Herminiinae	Hydrillodes	Hydrillodes uliginosalis	BOLD:ADZ4258	Pest/pollinator
Insecta	Lepidoptera	Erebidae, Noctuidae	Herminiinae	Hydrillodes	Hydrillodes uliginosalis	BOLD:ACE4994	Pest/pollinator
Insecta	Lepidoptera	Crambidae	Spilomelinae	Hymenia	Hymenia perspectalis	BOLD:AAB1651	Pest/pollinator
Insecta	Lepidoptera	Crambidae	Spilomelinae	Hymenia	Hymenia perspectalis	BOLD:ACF2276	Pest/pollinator
Insecta	Lepidoptera	Geometridae	Ennominae	Hyperythra	Hyperythra lutea	BOLD:ABA0047	Pest/pollinator
Insecta	Lepidoptera	Geometridae	Ennominae	Hypomecis, Ectropis, Racotis	Hypomecis roboraria, Ectropis AH01Pk, Racotis AH01Bu	BOLD:AAC9906	Pest/pollinator
Insecta	Lepidoptera	Geometridae	Ennominae	Hypomecis, Jankowskia	Hypomecis roboraria, Jankowskia fuscaria	BOLD:AEA8259	Pest/pollinator
Insecta	Lepidoptera	Geometridae	Sterrhinae	Scopula, Idaea	Idaea agrammaria, Idaea griveaudi, Idaea pulveraria	BOLD:AAE5595	Pest/pollinator
Insecta	Lepidoptera	Geometridae	Sterrhinae	Idaea	Idaea AH02Th, Idaea neanica	BOLD:ABV9788	Pest/pollinator
Insecta	Lepidoptera	Geometridae	Sterrhinae	Idaea	Idaea foedata	BOLD:ABA2911	Pest/pollinator
Insecta	Lepidoptera	Geometridae	Sterrhinae	Idaea	Idaea insularum	BOLD:ACM4092	Pest/pollinator
Insecta	Lepidoptera	Noctuidae	Noctuinae	Actinotia, Ipimorpha	Ipimorpha subtusa, Actinotia intermediata	BOLD:AAY7658	Pest/pollinator
Insecta	Lepidoptera	Geometridae	Geometrinae	Jodis	Jodis nanda	BOLD:AAK3725	Pest/pollinator
Insecta	Lepidoptera	Erebidae	Lymantriinae	Laelia	Laelia umbrina	BOLD:ACS0841	Pest/pollinator
Insecta	Lepidoptera	Lycaenidae	Polyommatinae	Zizeeria, Lampides, Pseudozizeeria	Lampides boeticus, Zizeeria maha, Pseudozizeeria maha	BOLD:AAA3849	Pest/pollinator
Insecta	Lepidoptera	Blastobasidae	Blastobasinae	Lateantenna	Lateantenna decolor	BOLD:ADF8350	Pest/pollinator
Insecta	Lepidoptera	Blastobasidae	Blastobasinae	Lateantenna	Lateantenna inana	BOLD:ACL6456	Pest/pollinator
Insecta	Lepidoptera	Nymphalidae	Satyrinae	Lethe	Lethe europa	BOLD:AAK9224	Pest/pollinator
Insecta	Lepidoptera	Noctuidae	Noctuinae	Leucania, Mythimna	Leucania obsoleta, Mythimna unipuncta	BOLD:AAD5689	Pest/pollinator
Insecta	Lepidoptera	Noctuidae	Noctuinae	Leucania	Leucania stenographa	BOLD:AAB6366	Pest/pollinator
Insecta	Lepidoptera	Plutellidae	Plutellinae	Leuroperna	Leuroperna sera	BOLD:ADI6320	Pest/pollinator
Insecta	Lepidoptera	Tortricidae	Olethreutinae	Lobesia	Lobesia nr. transtrifera, Lobesia aeolopa, Lobesia transtrifera	BOLD:AAC4015	Pest/pollinator
Insecta	Lepidoptera	Tortricidae	Olethreutinae	Loboschiza	Loboschiza koenigana, Loboschiza vulnerata	BOLD:ABA3382	Pest/pollinator
Insecta	Lepidoptera	Geometridae, Noctuidae	Larentiinae	Xanthorhoe, Loxofidonia	Loxofidonia muscicapata, Xanthorhoe saturata, Xanthorhoe AH01Pk	BOLD:AAG6123	Pest/pollinator
Insecta	Lepidoptera	Crambidae	Pyraustinae	Mabra	Mabra eryxalis	BOLD:AAF8522	Pest/pollinator
Insecta	Lepidoptera	Erebidae	Erebinae	Macaldenia	Macaldenia palumba	BOLD:AAG6038	Pest/pollinator
Insecta	Lepidoptera	Sphingidae	Macroglossinae	Macroglossum	Macroglossum gyrans, Macroglossum troglodytus, Macroglossum pyrrhosticta, Macroglossum neotroglodytus	BOLD:AAB9142	Pest/pollinator
Insecta	Lepidoptera	Sphingidae	Macroglossinae	Macroglossum	Macroglossum UB02, Macroglossum gyrans, Macroglossum neotroglodytus, Macroglossum variegatum, Macroglossum pyrrhosticta, Macroglossum pyrrhostictum	BOLD:AAB3002	Pest/pollinator
Insecta	Lepidoptera	Nymphalidae	Nymphalinae	Melitaea	Melitaea trivia	BOLD:ACM7718	Pest/pollinator
Insecta	Lepidoptera	Pyralidae	Phycitinae	Meyrickiella	Meyrickiella homosema	BOLD:AAG0433	Pest/pollinator
Insecta	Lepidoptera	Erebidae	Arctiinae	Miltochrista	Miltochrista calamina	BOLD:ADK5700	Pest/pollinator
Insecta	Lepidoptera	Pyralidae, Crambidae	Spilomelinae, Crambinae	Miyakea, Eurrhyparodes	Miyakea raddeella, Eurrhyparodes accessalis, Eurrhyparodes bracteolalis	BOLD:AAD1174	Pest/pollinator
Insecta	Lepidoptera	Erebidae	Erebinae, Catocalinae	Mocis	Mocis frugalis, Mocis proverai, Mocis WS01Th	BOLD:ABZ2788	Pest/pollinator
Insecta	Lepidoptera	Erebidae	Erebinae, Herminiinae, Catocalinae	Herminia, Mocis	Mocis undata, Mocis trifasciata, Herminia tarsipennalis	BOLD:AAB5638	Pest/pollinator
Insecta	Lepidoptera	Tineidae	Scardiinae	Morophaga	Morophaga formosana	BOLD:ADR3912	Pest/pollinator
Insecta	Lepidoptera	Nymphalidae	Satyrinae	Mycalesis	Mycalesis francisca, Mycalesis gotama, Mycalesis sp.	BOLD:AAF6712	Pest/pollinator
Insecta	Lepidoptera	Nymphalidae	Satyrinae	Mycalesis	Mycalesis mineus, Mycalesis panthaka, Mycalesis zonata, Mycalesis perseus, Mycalesis visala, Mycalesis perseoides, Mycalesis intermedia	BOLD:AAK8780	Pest/pollinator
Insecta	Lepidoptera	Nymphalidae	Satyrinae	Mycalesis	Mycalesis mineus, Mycalesis sp. SSG2014a, Mycalesis sp. SSG2014b, Mycalesis panthaka, Mycalesis perseoides, Mycalesis sp. 1 UK-2010	BOLD:AAN3496	Pest/pollinator
Insecta	Lepidoptera	Noctuidae	Noctuinae	Mythimna	Mythimna consanguis	BOLD:AAI3331	Pest/pollinator
Insecta	Lepidoptera	Noctuidae	Noctuinae	Mythimna	Mythimna consanguis	BOLD:AAK8653	Pest/pollinator
Insecta	Lepidoptera	Noctuidae	Noctuinae	Mythimna	Mythimna convecta	BOLD:AAB5610	Pest/pollinator
Insecta	Lepidoptera	Noctuidae	Noctuinae	Leucania, Mythimna	Mythimna loreyi, Leucania loreyi	BOLD:ACE6246	Pest/pollinator
Insecta	Lepidoptera	Noctuidae	Noctuinae	Leucania, Mythimna	Mythimna pseudoloreyi, Mythimna loreyi, Mythimna curvula, Leucania pseudoloreyi	BOLD:ACF5020	Pest/pollinator
Insecta	Lepidoptera	Noctuidae	Noctuinae	Mythimna	Mythimna separata	BOLD:ACE8377	Pest/pollinator
Insecta	Lepidoptera	Crambidae	Spilomelinae	Nausinoe	Nausinoe geometralis	BOLD:AAM0632	Pest/pollinator
Insecta	Lepidoptera	Blastobasidae	Blastobasinae	Neoblastobasis	Neoblastobasis spiniharpella	BOLD:AAX6193	Pest/pollinator
Insecta	Lepidoptera	Tortricidae	Tortricinae	Acleris, Neocalyptis	Neocalyptis sp., Acleris enitescens, Acleris crataegi	BOLD:ABA1861	Pest/pollinator
Insecta	Lepidoptera	Sphingidae	Macroglossinae	Neogurelca	Neogurelca himachala	BOLD:AAG4712	Pest/pollinator
Insecta	Lepidoptera	Nymphalidae	Limenitidinae	Neptis	Neptis hylas, Neptis clinia, Ideopsis vulgaris, Sithon nedymond, Neptis namba, Paduca fasciata, Neptis ida, Neptis duryodana, Rapala iarbus	BOLD:AAH5021	Pest/pollinator
Insecta	Lepidoptera	Noctuidae	Noctuinae	Niphonyx	Niphonyx segregata	BOLD:AAG5871	Pest/pollinator
Insecta	Lepidoptera	Nolidae	Nolinae	Nola	Nola cicatricalis	BOLD:ADJ9397	Pest/pollinator
Insecta	Lepidoptera	Crambidae	Spilomelinae	Notarcha		BOLD:ACE6204
Insecta	Lepidoptera	Tortricidae	Olethreutinae	Notocelia	Notocelia rosaecolana	BOLD:AAC1134	Pest/pollinator
Insecta	Lepidoptera	Erebidae	Arctiinae	Nyctemera	Nyctemera adversata	BOLD:AAG6329	Pest/pollinator
Insecta	Lepidoptera	Geometridae	Larentiinae	Nycterosea, Orthonoma, Orthonama	Nycterosea obstipata, Orthonoma obstipata, Orthonama obstipata	BOLD:AAA3431	Pest/pollinator
Insecta	Lepidoptera	Pyralidae, Crambidae	Spilomelinae	Omiodes	Omiodes sp. AAG0558, Omiodes nipponalis	BOLD:AAG0558	Pest/pollinator
Insecta	Lepidoptera	Pyralidae	Phycitinae	Salebriaria, Oncocera	Oncocera semirubella, Salebriaria semirubella	BOLD:AAD7672	Pest/pollinator
Insecta	Lepidoptera	Erebidae	Calpinae	Oraesia	Oraesia emarginata	BOLD:AAN4597	Pest/pollinator
Insecta	Lepidoptera	Crambidae, Erebidae	Spilomelinae, Lymantriinae	Herpetogramma, Orgyia, Haritalodes	Orgyia australis, Haritalodes derogata, Haritalodes sp. AAB8317, Herpetogramma platycapna	BOLD:AAB8317	Pest/pollinator
Insecta	Lepidoptera	Crambidae	Pyraustinae	Ostrinia	Ostrinia narynensis, Ostrinia furnacalis, Ostrinia nubilalis, Ostrinia zaguliaevi, Ostrinia zealis, Ostrinia scapulalis, Ostrinia kurentzovi, Ostrinia nr. zaguliaevi	BOLD:AAA2654	Pest/pollinator
Insecta	Lepidoptera	Crambidae	Spilomelinae	Palpita	Palpita fraterna, Palpita parvifraterna	BOLD:AAL7618	Pest/pollinator
Insecta	Lepidoptera	Crambidae	Spilomelinae	Palpita	Palpita hypohomalia, Palpita sp. 3 ZY, Palpita nigropunctalis	BOLD:AAD7044	Pest/pollinator
Insecta	Lepidoptera	Crambidae	Spilomelinae	Palpita	Palpita minuscula	BOLD:ABW6645	Pest/pollinator
Insecta	Lepidoptera	Erebidae	Pangraptinae	Pangrapta	Pangrapta bicornuta, Pangrapta perturbans, Pangrapta trimantesalis	BOLD:AAG5913	Pest/pollinator
Insecta	Lepidoptera	Papilionidae	Papilioninae	Papilio	Papilio polytes	BOLD:AAI6158	Pest/pollinator
Insecta	Lepidoptera	Papilionidae	Papilioninae	Papilio	Papilio xuthus	BOLD:AAA4525	Pest/pollinator
Insecta	Lepidoptera	Erebidae	Erebinae	Parallelia	Parallelia stuposa	BOLD:ABY5243	Pest/pollinator
Insecta	Lepidoptera	Hesperiidae	Hesperiinae	Parnara	Parnara guttatus	BOLD:ADC5076	Pest/pollinator
Insecta	Lepidoptera	Hesperiidae	Hesperiinae	Pelopidas	Pelopidas mathias	BOLD:AAD6584	Pest/pollinator
Insecta	Lepidoptera	Hesperiidae	Hesperiinae	Pelopidas	Pelopidas mathias	BOLD:ACE7433	Pest/pollinator
Insecta	Lepidoptera	Hesperiidae	Hesperiinae	Pelopidas	Pelopidas mathias	BOLD:ACE7434	Pest/pollinator
Insecta	Lepidoptera	Hesperiidae	Hesperiinae	Pelopidas	Pelopidas mathias	BOLD:ACS5779	Pest/pollinator
Insecta	Lepidoptera	Erebidae	Arctiinae	Pelosia	Pelosia muscerda	BOLD:AAD5281	Pest/pollinator
Insecta	Lepidoptera	Noctuidae	Noctuinae	Peridroma	Peridroma saucia, Peridroma sp. B	BOLD:AAA6377	Pest/pollinator
Insecta	Lepidoptera	Gracillariidae	Phyllocnistinae	Phyllocnistis	Phyllocnistis citrella	BOLD:AAP5978	Pest/pollinator
Insecta	Lepidoptera	Pieridae	Pierinae	Pieris	Pieris canidia	BOLD:AAF7628	Pest/pollinator
Insecta	Lepidoptera	Pieridae	Pierinae	Pieris	Pieris canidia	BOLD:ACB5732	Pest/pollinator
Insecta	Lepidoptera	Pieridae	Pierinae	Pieris	Pieris rapae	BOLD:AAA2224	Pest/pollinator
Insecta	Lepidoptera	Geometridae	Ennominae	Plesiolaea	Plesiolaea promacha	BOLD:ACJ9446	Pest/pollinator
Insecta	Lepidoptera	Pyralidae	Phycitinae	Plodia	Plodia interpunctella	BOLD:AAB2462	Pest/pollinator
Insecta	Lepidoptera	Erebidae	Calpinae	Plusiodonta	Plusiodonta coelonota	BOLD:ACD6159	Pest/pollinator
Insecta	Lepidoptera	Plutellidae	Plutellinae	Plutella	Plutella xylostella	BOLD:AAA1513	Pest/pollinator
Insecta	Lepidoptera	Nymphalidae	Nymphalinae	Polygonia	Polygonia caureum, Polygonia aureum, Polygonia c-album, Polygonia c-aureum	BOLD:AAD9073	Pest/pollinator
Insecta	Lepidoptera	Pyralidae, Crambidae	Spilomelinae	Herpetogramma, Pyralidae_incertae_sedis, Psara	Psara jasiusalis, Herpetogramma platycapna, Herpetogramma nr. stultalis, Herpetogramma stultalis, Pyralidae_incertae_sedis sp. 9, Herpetogramma rudis	BOLD:AAC2328	Pest/pollinator
Insecta	Lepidoptera	Hesperiidae	Tagiadinae	Pseudocoladenia	Pseudocoladenia dan	BOLD:ACS6774	Pest/pollinator
Insecta	Lepidoptera	Geometridae	Ennominae	Psilalcis	Psilalcis breta	BOLD:ABZ5213	Pest/pollinator
Insecta	Lepidoptera	Erebidae	Erebinae	Ptichodis	Ptichodis immunis	BOLD:AAA7258	Pest/pollinator
Insecta	Lepidoptera	Crambidae	Spilomelinae	Pycnarmon	Pycnarmon sp. AAC5783, Pycnarmon cribrata	BOLD:AAC5783	Pest/pollinator
Insecta	Lepidoptera	Hesperiidae	Pyrginae	Pyrgus	Pyrgus maculatus	BOLD:ADR5877	Pest/pollinator
Insecta	Lepidoptera	Crambidae	Spilomelinae	Rehimena	Rehimena phrynealis	BOLD:AAD4886	Pest/pollinator
Insecta	Lepidoptera	Tortricidae	Olethreutinae	Rhadinoscolops	Rhadinoscolops koenigiana	BOLD:AAE7465	Pest/pollinator
Insecta	Lepidoptera	Tortricidae	Olethreutinae	Rhadinoscolops	Rhadinoscolops koenigiana PS1, Rhadinoscolops koenigiana	BOLD:AAE7468	Pest/pollinator
Insecta	Lepidoptera	Tortricidae	Olethreutinae	Rhopobota	Rhopobota naevana	BOLD:AAA9812	Pest/pollinator
Insecta	Lepidoptera	Erebidae	Hypenodinae	Schrankia	Schrankia costaestrigalis, Schrankia intermedialis	BOLD:AAD1543	Pest/pollinator
Insecta	Lepidoptera	Geometridae	Sterrhinae	Scopula	Scopula AH01ST, Scopula AH01Pk, Scopula latitans	BOLD:ACM4640	Pest/pollinator
Insecta	Lepidoptera	Geometridae	Sterrhinae	Scopula		BOLD:AAJ5481
Insecta	Lepidoptera	Geometridae	Sterrhinae	Scopula		BOLD:AAE9763
Insecta	Lepidoptera	Geometridae	Sterrhinae	Scopula	Scopula AH03Th, Scopula nesciaroides	BOLD:AAJ5868	Pest/pollinator
Insecta	Lepidoptera	Geometridae	Sterrhinae	Scopula		BOLD:ABV8238
Insecta	Lepidoptera	Geometridae	Sterrhinae	Scopula	Scopula colymbas, Scopula latitans	BOLD:AAC7295	Pest/pollinator
Insecta	Lepidoptera	Geometridae	Sterrhinae	Scopula	Scopula hypochra	BOLD:AAA9027	Pest/pollinator
Insecta	Lepidoptera	Geometridae	Sterrhinae	Scopula		BOLD:AAQ0217
Insecta	Lepidoptera	Erebidae	Herminiinae	Simplicia	Simplicia cornicalis	BOLD:AAD1694	Pest/pollinator
Insecta	Lepidoptera	Lycaenidae	Theclinae	Sinthusa	Sinthusa chandrana	BOLD:AAJ7109	Pest/pollinator
Insecta	Lepidoptera	Gelechiidae	Apatetrinae	Sitotroga	Sitotroga cerealella	BOLD:AAD0546	Pest/pollinator
Insecta	Lepidoptera	Gelechiidae	Apatetrinae	Sitotroga	Sitotroga cerealella	BOLD:ADD1973	Pest/pollinator
Insecta	Lepidoptera	Erebidae	Arctiinae	Spilarctia	Spilarctia sp., Spilarctia alba	BOLD:ACW0149	Pest/pollinator
Insecta	Lepidoptera	Erebidae	Arctiinae	Spilosoma	Spilosoma lubricipeda	BOLD:AAB2233	Pest/pollinator
Insecta	Lepidoptera	Noctuidae	Noctuinae	Spodoptera	Spodoptera depravata, Spodoptera litura	BOLD:AAA8626	Pest/pollinator
Insecta	Lepidoptera	Noctuidae	Noctuinae, Bryophilinae	Spodoptera, Cryphia	Spodoptera exigua	BOLD:AAA6644	Pest/pollinator
Insecta	Lepidoptera	Crambidae	Spilomelinae	Spoladea	Spoladea mimetica, Spoladea recurvalis	BOLD:AAA3666	Pest/pollinator
Insecta	Lepidoptera	Stathmopodidae		Stathmopoda	Stathmopoda auriferella, Stathmopoda theoris	BOLD:ADM7218	Pest/pollinator
Insecta	Lepidoptera	Pterophoridae	Pterophorinae	Stenoptilodes	Stenoptilodes taprobanes, Stenoptilodes brevipennis	BOLD:AAD5104	Pest/pollinator
Insecta	Lepidoptera	Hesperiidae	Hesperiinae	Taractrocera	Taractrocera archias	BOLD:ADH6093	Pest/pollinator
Insecta	Lepidoptera	Noctuidae	Plusiinae	Thysanoplusia	Thysanoplusia intermixta	BOLD:ACB6622	Pest/pollinator
Insecta	Lepidoptera	Geometridae	Sterrhinae	Timandra	Timandra recompta	BOLD:ABX6023	Pest/pollinator
Insecta	Lepidoptera	Noctuidae	Noctuinae	Trachea	Trachea atriplicis	BOLD:AAE0836	Pest/pollinator
Insecta	Lepidoptera	Noctuidae	Plusiinae	Thysanoplusia, Trichoplusia	Trichoplusia daubei, Thysanoplusia daubei	BOLD:AAM5409	Pest/pollinator
Insecta	Lepidoptera	Erebidae	Erebinae	Grammodes, Trigonodes	Trigonodes hyppasia, Grammodes AH01Th	BOLD:AAA8493	Pest/pollinator
Insecta	Lepidoptera	Crambidae	Spilomelinae	Udea	Udea ferrugalis, Udea delineatalis	BOLD:AAC3729	Pest/pollinator
Insecta	Lepidoptera	Noctuidae	Bagisarinae, Plusiinae	Vittaplusia, Trichoplusia, Xanthodes	Vittaplusia vittata, Xanthodes albago, Trichoplusia vittata	BOLD:ACE8010	Pest/pollinator
Insecta	Lepidoptera	Geometridae, Crambidae	Larentiinae, Acentropinae	Xanthorhoe, Elophila	Xanthorhoe quadrifasciata, Elophila turbata	BOLD:AAQ1108	Pest/pollinator
Insecta	Lepidoptera	Geometridae	Larentiinae	Xanthorhoe, Orthonama	Xanthorhoe quadrifasciata, Orthonama AH01Tz, Orthonama obstipata	BOLD:ACF5811	Pest/pollinator
Insecta	Lepidoptera	Nymphalidae	Satyrinae	Mycalesis	Ypthima formosana, Mycalesis madjicosa, Mycalesis gotama	BOLD:ACQ6169	Pest/pollinator
Insecta	Lepidoptera	Lycaenidae	Coliadinae, Polyommatinae, Satyrinae	Zizina, Zizula, Ypthima, Actizera, Catopsilia	Zizina labradus, Actizera lucida, Zizina otis, Zizula hylax, Zizina antanossa, Zizina oxleyi, Zizina antanosa, Zizina emelina, Catopsilia pomona, Ypthima huebneri	BOLD:AAB2267	Pest/pollinator
Insecta	Lepidoptera	Noctuidae	Plusiinae	Zonoplusia	Zonoplusia ochreata	BOLD:ACL0573	Pest/pollinator
Insecta	Lepidoptera	Bedelliidae		Bedellia		BOLD:ADU0983
Insecta	Lepidoptera	Cosmopterigidae	Cosmopteriginae	Labdia		BOLD:ACO3703
Insecta	Lepidoptera	Cosmopterigidae				BOLD:ACV4132
[truncated: 142 more rows]
